# Supplementary material for: Genomic Instability of Circulating Tumor DNA as a Prognostic Marker for Pancreatic Cancer Survival: A Prospective Cohort Study
Source: Cancers (Basel). 2021 Oct 30;13(21):5466. doi: 10.3390/cancers13215466 (PMC8582446; doi:10.3390/cancers13215466)
Supplement: Supplementary file 1 [file cancers-13-05466-s001.zip › Supplementary Table.xlsx]

## Sheet: Table S1
Supplementary Table S1. Clinico-pathological characteristics between Chemagen and Qiagen kit in each status
		Resectable (n=110)					Locally advanced (n=78)					Metastatic (n=127)
		Total (n=110)	Kit		P-value		Total (n=78)	Kit		P-value		Total (n=127)	Kit		P-value
			Chemagen (n = 50)	Qiagen (n = 60)				Chemagen (n = 49)	Qiagen (n = 29)				Chemagen (n = 69)	Qiagen (n = 58)
Age	Mean ± SD	66.1 ± 10.4	67.6 ± 11.2	64.8 ± 9.6	0.1715		66.5 ± 9	67.3 ± 8.6	65.2 ± 9.7	0.3295		64.1 ± 9.3	64 ± 8.7	64.1 ± 10.2	0.9796
Sex
	Male	62	26 (52%)	36 (60%)	0.3996		41	23 (46.9%)	18 (62.1%)	0.1959		78	45 (65.2%)	33 (56.9%)	0.3373
	Female	48	24 (48%)	24 (40%)			37	26 (53.1%)	11 (37.9%)			49	24 (34.8%)	25 (43.1%)
Pancreatic tumor location
	Body or tail	46	25 (50%)	21 (35%)	0.1123		31	18 (36.7%)	13 (44.8%)	0.4803		87	45 (65.2%)	42 (72.4%)	0.3845
	Head or neck	64	25 (50%)	39 (65%)			47	31 (63.3%)	16 (55.2%)			40	24 (34.8%)	16 (27.6%)
CA19-9, U/mL
	≤37	56	26 (52%)	30 (50.9%)	0.9045		21	12 (24.5%)	9 (31%)	0.5288		29	19 (28.4%)	10 (17.5%)	0.1562
	>37	53	24 (48%)	29 (49.2%)			57	37 (75.5%)	20 (69%)			95	48 (71.6%)	47 (82.5%)
CEA, U/mL
	≤5	76	36 (75%)	40 (71.4%)	0.6823		39	22 (53.7%)	17 (65.4%)	0.343		37	22 (37.3%)	15 (27.3%)	0.2538
	>5	28	12 (25%)	16 (28.6%)			28	19 (46.3%)	9 (34.6%)			77	37 (62.7%)	40 (72.7%)
ECOG
	0+1	108	50 (100%)	58 (96.7%)	0.4996		76	47 (95.9%)	29 (100%)	0.5268		125	69 (100%)	56 (96.6%)	0.2066
	2+3	2	0 (0%)	2 (3.3%)			2	2 (4.1%)	0 (0%)			2	0 (0%)	2 (3.5%)
standard deviation, SD; carbohydrate antigen 19-9, CA19-9; carcinoembryonic antigen, CEA; Eastern Cooperative Oncology Group, ECOG

## Sheet: Table S2
Supplementary Table S2. Clinico-pathological characteristics between I-score high and low group in each status
Characteristic		Resectable (n=110)					Locally advanced (n=78)					Metastatic (n=127)
		Total (n=110)	I-score		P-value		Total (n=78)	I-score		P-value		Total (n=127)	I-score		P-value
			Low (n = 104)	High (n = 6)				Low (n = 74)	High (n = 4)				Low (n = 61)	High (n = 66)
Age	Mean ± SD	66.1 ± 10.4	65.9 ± 10.4	68.5 ± 10.9	0.5584		66.5 ± 9.0	66.3 ± 9.2	70.3 ± 5.2	0.3994		64.1 ± 9.3	64.9 ± 8.5	63.3 ± 10	0.3516
Sex
	Male	62 (56.4%)	59 (95.2%)	3 (4.8%)	>.9999		41 (52.6%)	39 (95.1%)	2 (4.9%)	>.9999		78 (61.4%)	38 (48.7%)	40 (51.3%)	0.8451
	Female	48 (43.6%)	45 (93.8%)	3 (6.3%)			37 (47.4%)	35 (94.6%)	2 (5.4%)			49 (38.6%)	23 (46.9%)	26 (53.1%)
Tumor location
	Body or tail	46 (41.8%)	44 (95.7%)	2 (4.4%)	>.9999		31 (39.7%)	28 (90.3%)	3 (9.7%)	0.2952		87 (68.5%)	36 (41.4%)	51 (58.6%)	0.0269
	Head or neck	64 (58.2%)	60 (93.8%)	4 (6.3%)			47 (60.3%)	46 (97.9%)	1 (2.1%)			40 (31.5%)	25 (62.5%)	15 (37.5%)
CA19-9, U/mL
	≤37	56 (51.4%)	54 (96.4%)	2 (3.6%)	0.4294		21 (26.9%)	20 (95.2%)	1 (4.8%)	>.9999		29 (23.4%)	21 (72.4%)	8 (27.6%)	0.0022
	>37	53 (48.6%)	49 (92.5%)	4 (7.6%)			57 (73.1%)	54 (94.7%)	3 (5.3%)			95 (76.6%)	38 (40.0%)	57 (60.0%)
CEA, U/mL
	≤5	76 (73.1%)	74 (97.4%)	2 (2.6%)	0.0436		39 (58.2%)	39 (100.0%)	0 (0.0%)	0.0267		37 (32.5%)	25 (67.6%)	12 (32.4%)	0.0028
	>5	28 (26.9%)	24 (85.7%)	4 (14.3%)			28 (41.8%)	24 (85.7%)	4 (14.3%)			77 (67.5%)	29 (37.7%)	48 (62.3%)
ECOG
	0+1	108 (98.2%)	102 (94.4%)	6 (5.6%)	>.9999		76 (97.4%)	72 (94.7%)	4 (5.3%)	>.9999		125 (98.4%)	60 (48.0%)	65 (52.0%)	>.9999
	2+3	2 (1.8%)	2 (100.0%)	0 (0.0%)			2 (2.6%)	2 (100.0%)	0 (0.0%)			2 (1.6%)	1 (50.0%)	1 (50.0%)
standard deviation, SD; carbohydrate antigen 19-9, CA19-9; carcinoembryonic antigen, CEA; Eastern Cooperative Oncology Group, ECOG

## Sheet: Table S3
Supplementary Table S3. Objective responses in patients receiving FOLFIRINOX* as first line chemotherapy
Variable		Total	I-score		P-value
		(n = 49)	Low (n = 34)	High (n = 15)
Response — no. (%)	complete response	1	1 (2.9)	0 (0.0)	0.001
	partial response	12	5 (14.7)	7 (46.7)
	stable disease	28	25 (73.5)	3 (20.0)
	progressive disease	8	3 (8.8)	5 (33.3)
Rate of objective response†	No. (%)	13	6 (17.7)	7 (46.7)	0.076
Rate of disease control‡	No. (%)	41	31 (91.2)	10 (66.7)	0.047
Response duration, months	median (range)	6.8 (2.0-15.4)	7.4 (2.7-15.4)	6.8 (2.0-14.5)	0.617
* FOLFIRINOX denotes oxaliplatin, irinotecan, fluorouracil, and leucovorin.
† The rate of objective response was defined as the percentage of patients who had a complete or partial response.
‡ The rate of disease control was defined as the percentage of patients who had a complete response, a partial response, or stable disease.

## Sheet: Table S4
Supplementary Table S4. GISTIC Classified Amplification and Deletion Regions
	Cytoband	Peak Limits	q-value
Amp	1q22	chr1:151000002-162000000	0.040509
	3q28	chr3:174000002-198022430	0.0030838
	8q24.23	chr8:125000002-146364022	0.00060333
	12p12.1	chr12:24000002-27000000	2.5998e-05
	19q13.2	chr19:31000002-59128983	2.5998e-05
Del	8p22	chr8:1-27000000	0.00010181
	9p22.1	chr9:1-27000000	0.22152
	18q21.33	chr18:57000002-65000000	0.00010181
amplification, Amp; deletion, Del

## Sheet: Table S5
Supplemental Table S5. Genes included in GISTIC amplification and deletion regions
GISTIC Reuslt	GISTIC Peak Limits	Overlapping Genes	Gene Coordinates	Reported in TCGA
Amp	chr8:125000002-146364022	TRMT12	chr8:125463047-125465266	Amp
Amp	chr8:125000002-146364022	RNF139	chr8:125487007-125500859	Amp
Amp	chr8:125000002-146364022	NDUFB9	chr8:125551342-125562227	Amp
Amp	chr8:125000002-146364022	ZNF572	chr8:125985538-125991630	Amp
Amp	chr8:125000002-146364022	TRIB1	chr8:126442562-126450647	Amp
Amp	chr8:125000002-146364022	PCAT1	chr8:128025398-128033259	Amp
Amp	chr8:125000002-146364022	POU5F1B	chr8:128427856-128429441	Amp
Amp	chr8:125000002-146364022	MYC	chr8:128748314-128753680	Amp
Amp	chr8:125000002-146364022	TMEM75	chr8:128958804-128960969	Amp
Amp	chr8:125000002-146364022	ASAP1-IT2	chr8:131094983-131097014	Amp
Amp	chr8:125000002-146364022	ASAP1-IT1	chr8:131307600-131308779	Amp
Amp	chr8:125000002-146364022	HPYR1	chr8:133572744-133573726	Amp
Amp	chr8:125000002-146364022	TATDN1	chr8:125500734-125551329	Amp
Amp	chr8:125000002-146364022	SQLE	chr8:126010719-126034525	Amp
Amp	chr8:125000002-146364022	LINC00861	chr8:126934766-126963441	Amp
Amp	chr8:125000002-146364022	CASC8	chr8:128455594-128494384	Amp
Amp	chr8:125000002-146364022	LINC00977	chr8:130228712-130253486	Amp
Amp	chr8:125000002-146364022	GSDMC	chr8:130760441-130799134	Amp
Amp	chr8:125000002-146364022	EFR3A	chr8:132916355-133025886	Amp
Amp	chr8:125000002-146364022	HHLA1	chr8:133073732-133117512	Amp
Amp	chr8:125000002-146364022	LRRC6	chr8:133584200-133687863	Amp
Amp	chr8:125000002-146364022	TMEM71	chr8:133722191-133772914	Amp
Amp	chr8:125000002-146364022	NDRG1	chr8:134249413-134309547	Amp
Amp	chr8:125000002-146364022	MTSS1	chr8:125563010-125740748	Amp
Amp	chr8:125000002-146364022	LINC00964	chr8:125954249-125963337	Amp
Amp	chr8:125000002-146364022	NSMCE2	chr8:126104082-126379367	Amp
Amp	chr8:125000002-146364022	FAM49B	chr8:130851838-131028897	Amp
Amp	chr8:125000002-146364022	ADCY8	chr8:131792546-132052835	Amp
Amp	chr8:125000002-146364022	OC90	chr8:133036466-133071627	Amp
Amp	chr8:125000002-146364022	PHF20L1	chr8:133787603-133861052	Amp
Amp	chr8:125000002-146364022	SLA	chr8:134048972-134115310	Amp
Amp	chr8:125000002-146364022	TG	chr8:133879204-134147143	Amp
Amp	chr8:125000002-146364022	ST3GAL1	chr8:134467090-134584183	Amp
Amp	chr8:125000002-146364022	ASAP1	chr8:131064350-131455906	Amp
Amp	chr8:125000002-146364022	KCNQ3	chr8:133133104-133493004	Amp
Amp	chr8:125000002-146364022	PVT1	chr8:128902873-129113499	Amp
Del	chr9:1-27000000	IFNA21	chr9:21165635-21166659	Del
Del	chr9:1-27000000	IFNA4	chr9:21186617-21187598	Del
Del	chr9:1-27000000	IFNA10	chr9:21206179-21207142	Del
Del	chr9:1-27000000	IFNA7	chr9:21201467-21202204	Del
Del	chr9:1-27000000	IFNA17	chr9:21227241-21228221	Del
Del	chr9:1-27000000	IFNA14	chr9:21239200-21239978	Del
Del	chr9:1-27000000	IFNA22P	chr9:21277686-21278562	Del
Del	chr9:1-27000000	IFNA5	chr9:21304612-21305312	Del
Del	chr9:1-27000000	IFNA6	chr9:21350316-21350886	Del
Del	chr9:1-27000000	IFNA13	chr9:21367370-21368075	Del
Del	chr9:1-27000000	IFNA2	chr9:21384253-21385396	Del
Del	chr9:1-27000000	IFNA8	chr9:21409145-21410184	Del
Del	chr9:1-27000000	IFNA1	chr9:21440452-21441315	Del
Del	chr9:1-27000000	IFNE	chr9:21480838-21482312	Del
Del	chr9:1-27000000	DMRTA1	chr9:22446839-22452472	Del
Del	chr9:1-27000000	IFNA16	chr9:21216371-21217310	Del
Del	chr9:1-27000000	KLHL9	chr9:21331017-21335429	Del
Del	chr9:1-27000000	MTAP	chr9:21802634-21865969	Del
Del	chr9:1-27000000	CDKN2A	chr9:21967750-21994490	Del
Del	chr9:1-27000000	CDKN2B	chr9:22002901-22009312	Del
Del	chr9:1-27000000	MIR31HG	chr9:21454266-21559697	Del
Del	chr9:1-27000000	CDKN2B-AS1	chr9:21994789-22121093	Del
Amp	chr1:151000002-162000000	C1orf56	chr1:151020258-151023871	Less frequent than 10%
Amp	chr1:151000002-162000000	MLLT11	chr1:151032150-151040973	Less frequent than 10%
Amp	chr1:151000002-162000000	LYSMD1	chr1:151132223-151138424	Less frequent than 10%
Amp	chr1:151000002-162000000	TNFAIP8L2	chr1:151129104-151132225	Less frequent than 10%
Amp	chr1:151000002-162000000	TMOD4	chr1:151142462-151148547	Less frequent than 10%
Amp	chr1:151000002-162000000	PSMD4	chr1:151227196-151239954	Less frequent than 10%
Amp	chr1:151000002-162000000	RFX5	chr1:151313115-151319769	Less frequent than 10%
Amp	chr1:151000002-162000000	PSMB4	chr1:151372040-151374412	Less frequent than 10%
Amp	chr1:151000002-162000000	MIR554	chr1:151518271-151518367	Less frequent than 10%
Amp	chr1:151000002-162000000	OAZ3	chr1:151735444-151743806	Less frequent than 10%
Amp	chr1:151000002-162000000	LINGO4	chr1:151772764-151777882	Less frequent than 10%
Amp	chr1:151000002-162000000	C2CD4D	chr1:151810338-151813033	Less frequent than 10%
Amp	chr1:151000002-162000000	THEM5	chr1:151819576-151826173	Less frequent than 10%
Amp	chr1:151000002-162000000	S100A11	chr1:152004981-152009511	Less frequent than 10%
Amp	chr1:151000002-162000000	TCHH	chr1:152078792-152087930	Less frequent than 10%
Amp	chr1:151000002-162000000	RPTN	chr1:152126070-152131704	Less frequent than 10%
Amp	chr1:151000002-162000000	CRNN	chr1:152381718-152386750	Less frequent than 10%
Amp	chr1:151000002-162000000	LCE5A	chr1:152483319-152484653	Less frequent than 10%
Amp	chr1:151000002-162000000	CRCT1	chr1:152486977-152488481	Less frequent than 10%
Amp	chr1:151000002-162000000	LCE3E	chr1:152538174-152539229	Less frequent than 10%
Amp	chr1:151000002-162000000	LCE3D	chr1:152551859-152552980	Less frequent than 10%
Amp	chr1:151000002-162000000	LCE3C	chr1:152573137-152573562	Less frequent than 10%
Amp	chr1:151000002-162000000	LCE3A	chr1:152595309-152595579	Less frequent than 10%
Amp	chr1:151000002-162000000	LCE3B	chr1:152586286-152586574	Less frequent than 10%
Amp	chr1:151000002-162000000	LCE2C	chr1:152647790-152649049	Less frequent than 10%
Amp	chr1:151000002-162000000	LCE2D	chr1:152635886-152637135	Less frequent than 10%
Amp	chr1:151000002-162000000	LCE2B	chr1:152658598-152659876	Less frequent than 10%
Amp	chr1:151000002-162000000	LCE2A	chr1:152670839-152671918	Less frequent than 10%
Amp	chr1:151000002-162000000	LCE4A	chr1:152681522-152681910	Less frequent than 10%
Amp	chr1:151000002-162000000	C1orf68	chr1:152691997-152692905	Less frequent than 10%
Amp	chr1:151000002-162000000	LCE1E	chr1:152758752-152760901	Less frequent than 10%
Amp	chr1:151000002-162000000	LCE1F	chr1:152748847-152749445	Less frequent than 10%
Amp	chr1:151000002-162000000	LCE1C	chr1:152777310-152779107	Less frequent than 10%
Amp	chr1:151000002-162000000	LCE1D	chr1:152769226-152770657	Less frequent than 10%
Amp	chr1:151000002-162000000	LCE1B	chr1:152784446-152785585	Less frequent than 10%
Amp	chr1:151000002-162000000	LCE1A	chr1:152799948-152800573	Less frequent than 10%
Amp	chr1:151000002-162000000	LCE6A	chr1:152815329-152816459	Less frequent than 10%
Amp	chr1:151000002-162000000	SMCP	chr1:152850797-152857523	Less frequent than 10%
Amp	chr1:151000002-162000000	IVL	chr1:152881038-152884362	Less frequent than 10%
Amp	chr1:151000002-162000000	SPRR1A	chr1:152956563-152958290	Less frequent than 10%
Amp	chr1:151000002-162000000	SPRR3	chr1:152974222-152976332	Less frequent than 10%
Amp	chr1:151000002-162000000	SPRR1B	chr1:153003678-153005376	Less frequent than 10%
Amp	chr1:151000002-162000000	SPRR2D	chr1:153012200-153013594	Less frequent than 10%
Amp	chr1:151000002-162000000	SPRR2A	chr1:153028595-153029988	Less frequent than 10%
Amp	chr1:151000002-162000000	SPRR2E	chr1:153065610-153067001	Less frequent than 10%
Amp	chr1:151000002-162000000	SPRR2F	chr1:153084612-153085989	Less frequent than 10%
Amp	chr1:151000002-162000000	SPRR2C	chr1:153112593-153113969	Less frequent than 10%
Amp	chr1:151000002-162000000	SPRR2G	chr1:153122057-153123427	Less frequent than 10%
Amp	chr1:151000002-162000000	LELP1	chr1:153175905-153177601	Less frequent than 10%
Amp	chr1:151000002-162000000	LOR	chr1:153232178-153234600	Less frequent than 10%
Amp	chr1:151000002-162000000	S100A9	chr1:153330329-153333503	Less frequent than 10%
Amp	chr1:151000002-162000000	S100A12	chr1:153346183-153348075	Less frequent than 10%
Amp	chr1:151000002-162000000	S100A8	chr1:153362507-153363664	Less frequent than 10%
Amp	chr1:151000002-162000000	S100A7A	chr1:153388999-153395701	Less frequent than 10%
Amp	chr1:151000002-162000000	S100A7L2	chr1:153409470-153412503	Less frequent than 10%
Amp	chr1:151000002-162000000	S100A7	chr1:153430219-153433137	Less frequent than 10%
Amp	chr1:151000002-162000000	S100A5	chr1:153509622-153514241	Less frequent than 10%
Amp	chr1:151000002-162000000	S100A6	chr1:153507075-153508717	Less frequent than 10%
Amp	chr1:151000002-162000000	S100A3	chr1:153519808-153521734	Less frequent than 10%
Amp	chr1:151000002-162000000	S100A14	chr1:153586731-153588808	Less frequent than 10%
Amp	chr1:151000002-162000000	S100A1	chr1:153600872-153604513	Less frequent than 10%
Amp	chr1:151000002-162000000	ILF2	chr1:153634263-153643504	Less frequent than 10%
Amp	chr1:151000002-162000000	SLC27A3	chr1:153747767-153752633	Less frequent than 10%
Amp	chr1:151000002-162000000	SLC39A1	chr1:153931574-153940660	Less frequent than 10%
Amp	chr1:151000002-162000000	JTB	chr1:153946744-153950451	Less frequent than 10%
Amp	chr1:151000002-162000000	RAB13	chr1:153954092-153958853	Less frequent than 10%
Amp	chr1:151000002-162000000	RPS27	chr1:153963238-153964631	Less frequent than 10%
Amp	chr1:151000002-162000000	MIR190B	chr1:154166140-154166219	Less frequent than 10%
Amp	chr1:151000002-162000000	HAX1	chr1:154245038-154248355	Less frequent than 10%
Amp	chr1:151000002-162000000	AQP10	chr1:154293591-154297801	Less frequent than 10%
Amp	chr1:151000002-162000000	UBE2Q1	chr1:154521050-154531120	Less frequent than 10%
Amp	chr1:151000002-162000000	PMVK	chr1:154897207-154909484	Less frequent than 10%
Amp	chr1:151000002-162000000	PYGO2	chr1:154929501-154934258	Less frequent than 10%
Amp	chr1:151000002-162000000	CKS1B	chr1:154947117-154951725	Less frequent than 10%
Amp	chr1:151000002-162000000	MIR4258	chr1:154948168-154948259	Less frequent than 10%
Amp	chr1:151000002-162000000	LENEP	chr1:154966061-154966791	Less frequent than 10%
Amp	chr1:151000002-162000000	DPM3	chr1:155112366-155112996	Less frequent than 10%
Amp	chr1:151000002-162000000	SLC50A1	chr1:155108287-155111334	Less frequent than 10%
Amp	chr1:151000002-162000000	KRTCAP2	chr1:155141883-155145804	Less frequent than 10%
Amp	chr1:151000002-162000000	MIR92B	chr1:155164967-155165063	Less frequent than 10%
Amp	chr1:151000002-162000000	MUC1	chr1:155158299-155162706	Less frequent than 10%
Amp	chr1:151000002-162000000	MTX1	chr1:155178489-155183624	Less frequent than 10%
Amp	chr1:151000002-162000000	SCAMP3	chr1:155225769-155232176	Less frequent than 10%
Amp	chr1:151000002-162000000	RUSC1	chr1:155290639-155300909	Less frequent than 10%
Amp	chr1:151000002-162000000	RUSC1-AS1	chr1:155290250-155293938	Less frequent than 10%
Amp	chr1:151000002-162000000	MIR555	chr1:155316140-155316236	Less frequent than 10%
Amp	chr1:151000002-162000000	POU5F1P4	chr1:155402970-155404053	Less frequent than 10%
Amp	chr1:151000002-162000000	SNORA42	chr1:155889699-155889833	Less frequent than 10%
Amp	chr1:151000002-162000000	SCARNA4	chr1:155895748-155895877	Less frequent than 10%
Amp	chr1:151000002-162000000	RXFP4	chr1:155911479-155912625	Less frequent than 10%
Amp	chr1:151000002-162000000	SSR2	chr1:155978838-155990758	Less frequent than 10%
Amp	chr1:151000002-162000000	RAB25	chr1:156030965-156040295	Less frequent than 10%
Amp	chr1:151000002-162000000	MEX3A	chr1:156041803-156051789	Less frequent than 10%
Amp	chr1:151000002-162000000	BGLAP	chr1:156211950-156213123	Less frequent than 10%
Amp	chr1:151000002-162000000	PAQR6	chr1:156213111-156217908	Less frequent than 10%
Amp	chr1:151000002-162000000	C1orf85	chr1:156262477-156265480	Less frequent than 10%
Amp	chr1:151000002-162000000	VHLL	chr1:156268414-156269428	Less frequent than 10%
Amp	chr1:151000002-162000000	TSACC	chr1:156307104-156316785	Less frequent than 10%
Amp	chr1:151000002-162000000	MIR9-1	chr1:156390132-156390221	Less frequent than 10%
Amp	chr1:151000002-162000000	APOA1BP	chr1:156561557-156564091	Less frequent than 10%
Amp	chr1:151000002-162000000	TTC24	chr1:156549518-156556562	Less frequent than 10%
Amp	chr1:151000002-162000000	HAPLN2	chr1:156589085-156595517	Less frequent than 10%
Amp	chr1:151000002-162000000	NES	chr1:156638555-156647189	Less frequent than 10%
Amp	chr1:151000002-162000000	CRABP2	chr1:156669399-156675608	Less frequent than 10%
Amp	chr1:151000002-162000000	MRPL24	chr1:156707093-156710923	Less frequent than 10%
Amp	chr1:151000002-162000000	RRNAD1	chr1:156698262-156706752	Less frequent than 10%
Amp	chr1:151000002-162000000	MIR765	chr1:156905922-156906036	Less frequent than 10%
Amp	chr1:151000002-162000000	ETV3L	chr1:157061834-157069600	Less frequent than 10%
Amp	chr1:151000002-162000000	CYCSP52	chr1:157098153-157098463	Less frequent than 10%
Amp	chr1:151000002-162000000	CD1A	chr1:158223926-158228058	Less frequent than 10%
Amp	chr1:151000002-162000000	CD1C	chr1:158259562-158264564	Less frequent than 10%
Amp	chr1:151000002-162000000	CD1B	chr1:158297739-158301321	Less frequent than 10%
Amp	chr1:151000002-162000000	CD1E	chr1:158323485-158327343	Less frequent than 10%
Amp	chr1:151000002-162000000	OR10T2	chr1:158368311-158369256	Less frequent than 10%
Amp	chr1:151000002-162000000	OR10K2	chr1:158389717-158390656	Less frequent than 10%
Amp	chr1:151000002-162000000	OR10K1	chr1:158435351-158436293	Less frequent than 10%
Amp	chr1:151000002-162000000	OR10R2	chr1:158449667-158450675	Less frequent than 10%
Amp	chr1:151000002-162000000	OR6Y1	chr1:158516917-158517895	Less frequent than 10%
Amp	chr1:151000002-162000000	OR6P1	chr1:158532440-158533394	Less frequent than 10%
Amp	chr1:151000002-162000000	OR10X1	chr1:158548708-158549689	Less frequent than 10%
Amp	chr1:151000002-162000000	OR10Z1	chr1:158576228-158577170	Less frequent than 10%
Amp	chr1:151000002-162000000	OR6K2	chr1:158669467-158670442	Less frequent than 10%
Amp	chr1:151000002-162000000	OR6K3	chr1:158686957-158687905	Less frequent than 10%
Amp	chr1:151000002-162000000	OR6K6	chr1:158724605-158725637	Less frequent than 10%
Amp	chr1:151000002-162000000	OR6N1	chr1:158735533-158736472	Less frequent than 10%
Amp	chr1:151000002-162000000	OR6N2	chr1:158746471-158747425	Less frequent than 10%
Amp	chr1:151000002-162000000	DARC	chr1:159173802-159176290	Less frequent than 10%
Amp	chr1:151000002-162000000	OR10J3	chr1:159283459-159284449	Less frequent than 10%
Amp	chr1:151000002-162000000	OR10J1	chr1:159409511-159410600	Less frequent than 10%
Amp	chr1:151000002-162000000	OR10J5	chr1:159504867-159505797	Less frequent than 10%
Amp	chr1:151000002-162000000	APCS	chr1:159557615-159558661	Less frequent than 10%
Amp	chr1:151000002-162000000	CRP	chr1:159682078-159684379	Less frequent than 10%
Amp	chr1:151000002-162000000	DUSP23	chr1:159750758-159752333	Less frequent than 10%
Amp	chr1:151000002-162000000	SLAMF8	chr1:159796478-159807282	Less frequent than 10%
Amp	chr1:151000002-162000000	SLAMF9	chr1:159921281-159924044	Less frequent than 10%
Amp	chr1:151000002-162000000	PIGM	chr1:159997461-160001783	Less frequent than 10%
Amp	chr1:151000002-162000000	IGSF8	chr1:160061128-160068618	Less frequent than 10%
Amp	chr1:151000002-162000000	PEA15	chr1:160175124-160185162	Less frequent than 10%
Amp	chr1:151000002-162000000	SUMO1P3	chr1:160287054-160288260	Less frequent than 10%
Amp	chr1:151000002-162000000	NHLH1	chr1:160336860-160342638	Less frequent than 10%
Amp	chr1:151000002-162000000	ITLN1	chr1:160846329-160854960	Less frequent than 10%
Amp	chr1:151000002-162000000	TSTD1	chr1:161007421-161008774	Less frequent than 10%
Amp	chr1:151000002-162000000	USF1	chr1:161009040-161015769	Less frequent than 10%
Amp	chr1:151000002-162000000	KLHDC9	chr1:161068150-161070138	Less frequent than 10%
Amp	chr1:151000002-162000000	DEDD	chr1:161090768-161102478	Less frequent than 10%
Amp	chr1:151000002-162000000	NIT1	chr1:161087861-161095235	Less frequent than 10%
Amp	chr1:151000002-162000000	UFC1	chr1:161123533-161128646	Less frequent than 10%
Amp	chr1:151000002-162000000	USP21	chr1:161129253-161135516	Less frequent than 10%
Amp	chr1:151000002-162000000	B4GALT3	chr1:161141099-161147758	Less frequent than 10%
Amp	chr1:151000002-162000000	ADAMTS4	chr1:161159537-161168845	Less frequent than 10%
Amp	chr1:151000002-162000000	APOA2	chr1:161192082-161193418	Less frequent than 10%
Amp	chr1:151000002-162000000	MIR5187	chr1:161196975-161197051	Less frequent than 10%
Amp	chr1:151000002-162000000	TOMM40L	chr1:161195728-161200536	Less frequent than 10%
Amp	chr1:151000002-162000000	MPZ	chr1:161274524-161279762	Less frequent than 10%
Amp	chr1:151000002-162000000	C1orf192	chr1:161334520-161337673	Less frequent than 10%
Amp	chr1:151000002-162000000	HSPA6	chr1:161494035-161496687	Less frequent than 10%
Amp	chr1:151000002-162000000	HSPA7	chr1:161575848-161578341	Less frequent than 10%
Amp	chr1:151000002-162000000	RPL31P11	chr1:161653494-161655042	Less frequent than 10%
Amp	chr1:151000002-162000000	BNIPL	chr1:151009028-151020076	Less frequent than 10%
Amp	chr1:151000002-162000000	CDC42SE1	chr1:151023446-151032125	Less frequent than 10%
Amp	chr1:151000002-162000000	GABPB2	chr1:151043079-151091007	Less frequent than 10%
Amp	chr1:151000002-162000000	SEMA6C	chr1:151104162-151119140	Less frequent than 10%
Amp	chr1:151000002-162000000	PIP5K1A	chr1:151171020-151222007	Less frequent than 10%
Amp	chr1:151000002-162000000	SCNM1	chr1:151138497-151142773	Less frequent than 10%
Amp	chr1:151000002-162000000	TNFAIP8L2-SCNM1	chr1:151129104-151142773	Less frequent than 10%
Amp	chr1:151000002-162000000	VPS72	chr1:151148775-151162689	Less frequent than 10%
Amp	chr1:151000002-162000000	PI4KB	chr1:151264272-151300191	Less frequent than 10%
Amp	chr1:151000002-162000000	SELENBP1	chr1:151336777-151345210	Less frequent than 10%
Amp	chr1:151000002-162000000	CGN	chr1:151483861-151511167	Less frequent than 10%
Amp	chr1:151000002-162000000	CELF3	chr1:151672533-151689290	Less frequent than 10%
Amp	chr1:151000002-162000000	MRPL9	chr1:151732122-151736040	Less frequent than 10%
Amp	chr1:151000002-162000000	RIIAD1	chr1:151694012-151702082	Less frequent than 10%
Amp	chr1:151000002-162000000	TDRKH	chr1:151744040-151763010	Less frequent than 10%
Amp	chr1:151000002-162000000	LOC100132111	chr1:151810944-151816641	Less frequent than 10%
Amp	chr1:151000002-162000000	THEM4	chr1:151843342-151882361	Less frequent than 10%
Amp	chr1:151000002-162000000	NBPF18P	chr1:151990753-151994985	Less frequent than 10%
Amp	chr1:151000002-162000000	S100A10	chr1:151955385-151966714	Less frequent than 10%
Amp	chr1:151000002-162000000	TCHHL1	chr1:152056619-152061540	Less frequent than 10%
Amp	chr1:151000002-162000000	FLG	chr1:152274650-152297679	Less frequent than 10%
Amp	chr1:151000002-162000000	HRNR	chr1:152184551-152196672	Less frequent than 10%
Amp	chr1:151000002-162000000	FLG2	chr1:152321212-152332482	Less frequent than 10%
Amp	chr1:151000002-162000000	KPRP	chr1:152730505-152734529	Less frequent than 10%
Amp	chr1:151000002-162000000	SPRR4	chr1:152943127-152945069	Less frequent than 10%
Amp	chr1:151000002-162000000	SPRR2B	chr1:153042717-153044084	Less frequent than 10%
Amp	chr1:151000002-162000000	PRR9	chr1:153190059-153191793	Less frequent than 10%
Amp	chr1:151000002-162000000	PGLYRP3	chr1:153270337-153283194	Less frequent than 10%
Amp	chr1:151000002-162000000	PGLYRP4	chr1:153302596-153321022	Less frequent than 10%
Amp	chr1:151000002-162000000	S100A13	chr1:153591275-153606568	Less frequent than 10%
Amp	chr1:151000002-162000000	S100A16	chr1:153579366-153585514	Less frequent than 10%
Amp	chr1:151000002-162000000	S100A2	chr1:153533584-153538306	Less frequent than 10%
Amp	chr1:151000002-162000000	S100A4	chr1:153516094-153518282	Less frequent than 10%
Amp	chr1:151000002-162000000	INTS3	chr1:153700566-153746555	Less frequent than 10%
Amp	chr1:151000002-162000000	NPR1	chr1:153651163-153666468	Less frequent than 10%
Amp	chr1:151000002-162000000	SNAPIN	chr1:153631129-153634328	Less frequent than 10%
Amp	chr1:151000002-162000000	CREB3L4	chr1:153940314-153946840	Less frequent than 10%
Amp	chr1:151000002-162000000	CRTC2	chr1:153920147-153931132	Less frequent than 10%
Amp	chr1:151000002-162000000	DENND4B	chr1:153901976-153919154	Less frequent than 10%
Amp	chr1:151000002-162000000	C1orf189	chr1:154171561-154178841	Less frequent than 10%
Amp	chr1:151000002-162000000	C1orf43	chr1:154179182-154193273	Less frequent than 10%
Amp	chr1:151000002-162000000	UBAP2L	chr1:154192654-154243329	Less frequent than 10%
Amp	chr1:151000002-162000000	ATP8B2	chr1:154298035-154323780	Less frequent than 10%
Amp	chr1:151000002-162000000	SHE	chr1:154451953-154474526	Less frequent than 10%
Amp	chr1:151000002-162000000	TDRD10	chr1:154474694-154520623	Less frequent than 10%
Amp	chr1:151000002-162000000	ADAR	chr1:154554533-154600456	Less frequent than 10%
Amp	chr1:151000002-162000000	CHRNB2	chr1:154540256-154552353	Less frequent than 10%
Amp	chr1:151000002-162000000	ADAM15	chr1:155023747-155035252	Less frequent than 10%
Amp	chr1:151000002-162000000	DCST1	chr1:155006281-155023406	Less frequent than 10%
Amp	chr1:151000002-162000000	DCST2	chr1:154991002-155006257	Less frequent than 10%
Amp	chr1:151000002-162000000	EFNA4	chr1:155036212-155042029	Less frequent than 10%
Amp	chr1:151000002-162000000	FLAD1	chr1:154955769-154965587	Less frequent than 10%
Amp	chr1:151000002-162000000	LOC100505666	chr1:155017667-155036467	Less frequent than 10%
Amp	chr1:151000002-162000000	SHC1	chr1:154934773-154946959	Less frequent than 10%
Amp	chr1:151000002-162000000	ZBTB7B	chr1:154975105-154991001	Less frequent than 10%
Amp	chr1:151000002-162000000	EFNA1	chr1:155100348-155107386	Less frequent than 10%
Amp	chr1:151000002-162000000	THBS3	chr1:155165378-155177772	Less frequent than 10%
Amp	chr1:151000002-162000000	TRIM46	chr1:155146262-155157447	Less frequent than 10%
Amp	chr1:151000002-162000000	CLK2	chr1:155232658-155243281	Less frequent than 10%
Amp	chr1:151000002-162000000	FAM189B	chr1:155216995-155225274	Less frequent than 10%
Amp	chr1:151000002-162000000	FDPS	chr1:155278538-155290457	Less frequent than 10%
Amp	chr1:151000002-162000000	GBA	chr1:155204238-155214653	Less frequent than 10%
Amp	chr1:151000002-162000000	HCN3	chr1:155247217-155259639	Less frequent than 10%
Amp	chr1:151000002-162000000	PKLR	chr1:155259083-155271225	Less frequent than 10%
Amp	chr1:151000002-162000000	ASH1L-AS1	chr1:155531771-155533735	Less frequent than 10%
Amp	chr1:151000002-162000000	DAP3	chr1:155658881-155708800	Less frequent than 10%
Amp	chr1:151000002-162000000	YY1AP1	chr1:155629232-155658823	Less frequent than 10%
Amp	chr1:151000002-162000000	GON4L	chr1:155719448-155829191	Less frequent than 10%
Amp	chr1:151000002-162000000	ARHGEF2	chr1:155916629-155948336	Less frequent than 10%
Amp	chr1:151000002-162000000	KIAA0907	chr1:155882835-155904188	Less frequent than 10%
Amp	chr1:151000002-162000000	RIT1	chr1:155867598-155881193	Less frequent than 10%
Amp	chr1:151000002-162000000	LAMTOR2	chr1:156024516-156028301	Less frequent than 10%
Amp	chr1:151000002-162000000	UBQLN4	chr1:156005091-156023516	Less frequent than 10%
Amp	chr1:151000002-162000000	PMF1	chr1:156182778-156209868	Less frequent than 10%
Amp	chr1:151000002-162000000	PMF1-BGLAP	chr1:156182778-156213123	Less frequent than 10%
Amp	chr1:151000002-162000000	SEMA4A	chr1:156119734-156147542	Less frequent than 10%
Amp	chr1:151000002-162000000	SLC25A44	chr1:156163722-156182587	Less frequent than 10%
Amp	chr1:151000002-162000000	CCT3	chr1:156278751-156308206	Less frequent than 10%
Amp	chr1:151000002-162000000	RHBG	chr1:156338979-156355013	Less frequent than 10%
Amp	chr1:151000002-162000000	TMEM79	chr1:156252703-156262234	Less frequent than 10%
Amp	chr1:151000002-162000000	C1orf61	chr1:156374054-156399184	Less frequent than 10%
Amp	chr1:151000002-162000000	MEF2D	chr1:156433512-156470634	Less frequent than 10%
Amp	chr1:151000002-162000000	BCAN	chr1:156611739-156629324	Less frequent than 10%
Amp	chr1:151000002-162000000	GPATCH4	chr1:156564099-156571279	Less frequent than 10%
Amp	chr1:151000002-162000000	HDGF	chr1:156711898-156722240	Less frequent than 10%
Amp	chr1:151000002-162000000	ISG20L2	chr1:156692412-156697705	Less frequent than 10%
Amp	chr1:151000002-162000000	INSRR	chr1:156810664-156828712	Less frequent than 10%
Amp	chr1:151000002-162000000	NTRK1	chr1:156785541-156851642	Less frequent than 10%
Amp	chr1:151000002-162000000	PEAR1	chr1:156863522-156886226	Less frequent than 10%
Amp	chr1:151000002-162000000	SH2D2A	chr1:156776034-156786640	Less frequent than 10%
Amp	chr1:151000002-162000000	ARHGEF11	chr1:156904631-157015162	Less frequent than 10%
Amp	chr1:151000002-162000000	ETV3	chr1:157094458-157108383	Less frequent than 10%
Amp	chr1:151000002-162000000	FCRL5	chr1:157483166-157522310	Less frequent than 10%
Amp	chr1:151000002-162000000	FCRL3	chr1:157647977-157670647	Less frequent than 10%
Amp	chr1:151000002-162000000	FCRL1	chr1:157764193-157789940	Less frequent than 10%
Amp	chr1:151000002-162000000	FCRL2	chr1:157715522-157746922	Less frequent than 10%
Amp	chr1:151000002-162000000	KIRREL	chr1:157963062-158070052	Less frequent than 10%
Amp	chr1:151000002-162000000	CD1D	chr1:158149736-158156216	Less frequent than 10%
Amp	chr1:151000002-162000000	LOC646268	chr1:158101833-158110430	Less frequent than 10%
Amp	chr1:151000002-162000000	MNDA	chr1:158801167-158819270	Less frequent than 10%
Amp	chr1:151000002-162000000	PYHIN1	chr1:158901336-158946849	Less frequent than 10%
Amp	chr1:151000002-162000000	AIM2	chr1:159032274-159046647	Less frequent than 10%
Amp	chr1:151000002-162000000	CADM3	chr1:159141376-159172932	Less frequent than 10%
Amp	chr1:151000002-162000000	LOC100131825	chr1:159165774-159172212	Less frequent than 10%
Amp	chr1:151000002-162000000	FCER1A	chr1:159259503-159278014	Less frequent than 10%
Amp	chr1:151000002-162000000	C1orf204	chr1:159804263-159825137	Less frequent than 10%
Amp	chr1:151000002-162000000	CCDC19	chr1:159842153-159869906	Less frequent than 10%
Amp	chr1:151000002-162000000	TAGLN2	chr1:159887896-159895332	Less frequent than 10%
Amp	chr1:151000002-162000000	VSIG8	chr1:159824105-159832447	Less frequent than 10%
Amp	chr1:151000002-162000000	LOC100505633	chr1:159931013-159948876	Less frequent than 10%
Amp	chr1:151000002-162000000	ATP1A2	chr1:160085519-160113374	Less frequent than 10%
Amp	chr1:151000002-162000000	ATP1A4	chr1:160121351-160156767	Less frequent than 10%
Amp	chr1:151000002-162000000	KCNJ9	chr1:160051359-160059212	Less frequent than 10%
Amp	chr1:151000002-162000000	DCAF8	chr1:160185504-160232350	Less frequent than 10%
Amp	chr1:151000002-162000000	PEX19	chr1:160246598-160254941	Less frequent than 10%
Amp	chr1:151000002-162000000	NCSTN	chr1:160313062-160328742	Less frequent than 10%
Amp	chr1:151000002-162000000	VANGL2	chr1:160370363-160398468	Less frequent than 10%
Amp	chr1:151000002-162000000	CD84	chr1:160510883-160549306	Less frequent than 10%
Amp	chr1:151000002-162000000	SLAMF6	chr1:160454819-160493052	Less frequent than 10%
Amp	chr1:151000002-162000000	CD48	chr1:160648535-160681641	Less frequent than 10%
Amp	chr1:151000002-162000000	SLAMF1	chr1:160579608-160617101	Less frequent than 10%
Amp	chr1:151000002-162000000	LY9	chr1:160765863-160798045	Less frequent than 10%
Amp	chr1:151000002-162000000	SLAMF7	chr1:160708846-160724608	Less frequent than 10%
Amp	chr1:151000002-162000000	ITLN2	chr1:160914815-160924589	Less frequent than 10%
Amp	chr1:151000002-162000000	ARHGAP30	chr1:161016731-161039760	Less frequent than 10%
Amp	chr1:151000002-162000000	F11R	chr1:160965000-160991133	Less frequent than 10%
Amp	chr1:151000002-162000000	PVRL4	chr1:161040780-161059385	Less frequent than 10%
Amp	chr1:151000002-162000000	FCER1G	chr1:161185086-161189038	Less frequent than 10%
Amp	chr1:151000002-162000000	NDUFS2	chr1:161169104-161184184	Less frequent than 10%
Amp	chr1:151000002-162000000	NR1I3	chr1:161199455-161208000	Less frequent than 10%
Amp	chr1:151000002-162000000	PPOX	chr1:161136180-161141010	Less frequent than 10%
Amp	chr1:151000002-162000000	PCP4L1	chr1:161228516-161255240	Less frequent than 10%
Amp	chr1:151000002-162000000	SDHC	chr1:161284165-161334535	Less frequent than 10%
Amp	chr1:151000002-162000000	FCGR2C	chr1:161551128-161571010	Less frequent than 10%
Amp	chr1:151000002-162000000	FCGR3A	chr1:161511550-161520413	Less frequent than 10%
Amp	chr1:151000002-162000000	FCGR3B	chr1:161592987-161601753	Less frequent than 10%
Amp	chr1:151000002-162000000	DUSP12	chr1:161719580-161726952	Less frequent than 10%
Amp	chr1:151000002-162000000	FCGR2B	chr1:161632904-161648444	Less frequent than 10%
Amp	chr1:151000002-162000000	FCRLA	chr1:161676761-161684142	Less frequent than 10%
Amp	chr1:151000002-162000000	FCRLB	chr1:161692456-161697933	Less frequent than 10%
Amp	chr1:151000002-162000000	OLFML2B	chr1:161952981-161993644	Less frequent than 10%
Amp	chr1:151000002-162000000	POGZ	chr1:151375199-151431941	Less frequent than 10%
Amp	chr1:151000002-162000000	RORC	chr1:151778546-151804348	Less frequent than 10%
Amp	chr1:151000002-162000000	SNX27	chr1:151584661-151671559	Less frequent than 10%
Amp	chr1:151000002-162000000	TUFT1	chr1:151512780-151556059	Less frequent than 10%
Amp	chr1:151000002-162000000	ZNF687	chr1:151254790-151264381	Less frequent than 10%
Amp	chr1:151000002-162000000	FLG-AS1	chr1:152285934-152339168	Less frequent than 10%
Amp	chr1:151000002-162000000	CHTOP	chr1:153606457-153618782	Less frequent than 10%
Amp	chr1:151000002-162000000	GATAD2B	chr1:153777202-153895451	Less frequent than 10%
Amp	chr1:151000002-162000000	NUP210L	chr1:153965167-154127592	Less frequent than 10%
Amp	chr1:151000002-162000000	EFNA3	chr1:155051347-155060014	Less frequent than 10%
Amp	chr1:151000002-162000000	IL6R	chr1:154377668-154441926	Less frequent than 10%
Amp	chr1:151000002-162000000	KCNN3	chr1:154669941-154842754	Less frequent than 10%
Amp	chr1:151000002-162000000	PBXIP1	chr1:154916558-154928567	Less frequent than 10%
Amp	chr1:151000002-162000000	ASH1L	chr1:155305051-155532324	Less frequent than 10%
Amp	chr1:151000002-162000000	LMNA	chr1:156052336-156109880	Less frequent than 10%
Amp	chr1:151000002-162000000	MSTO1	chr1:155579960-155584758	Less frequent than 10%
Amp	chr1:151000002-162000000	MSTO2P	chr1:155579978-155720479	Less frequent than 10%
Amp	chr1:151000002-162000000	SYT11	chr1:155829259-155854990	Less frequent than 10%
Amp	chr1:151000002-162000000	IQGAP3	chr1:156495196-156542396	Less frequent than 10%
Amp	chr1:151000002-162000000	LRRC71	chr1:156890423-156902880	Less frequent than 10%
Amp	chr1:151000002-162000000	PRCC	chr1:156737273-156770609	Less frequent than 10%
Amp	chr1:151000002-162000000	CD5L	chr1:157800703-157811634	Less frequent than 10%
Amp	chr1:151000002-162000000	FCRL4	chr1:157543538-157567870	Less frequent than 10%
Amp	chr1:151000002-162000000	IFI16	chr1:158979681-159024945	Less frequent than 10%
Amp	chr1:151000002-162000000	SPTA1	chr1:158580495-158656506	Less frequent than 10%
Amp	chr1:151000002-162000000	CASQ1	chr1:160160284-160171676	Less frequent than 10%
Amp	chr1:151000002-162000000	COPA	chr1:160258376-160313354	Less frequent than 10%
Amp	chr1:151000002-162000000	FCRL6	chr1:159770300-159786047	Less frequent than 10%
Amp	chr1:151000002-162000000	IGSF9	chr1:159896828-159915386	Less frequent than 10%
Amp	chr1:151000002-162000000	KCNJ10	chr1:160007256-160040051	Less frequent than 10%
Amp	chr1:151000002-162000000	CD244	chr1:160799949-160832692	Less frequent than 10%
Amp	chr1:151000002-162000000	PFDN2	chr1:161070345-161087866	Less frequent than 10%
Amp	chr1:151000002-162000000	ATF6	chr1:161736033-161933860	Less frequent than 10%
Amp	chr1:151000002-162000000	GBAP1	chr1:155183615-155197325	Less frequent than 10%
Amp	chr1:151000002-162000000	SMG5	chr1:156219014-156252620	Less frequent than 10%
Amp	chr1:151000002-162000000	TPM3	chr1:154127779-154164611	Less frequent than 10%
Amp	chr1:151000002-162000000	FCGR2A	chr1:161475204-161489360	Less frequent than 10%
Amp	chr1:151000002-162000000	PRUNE	chr1:150980972-151008189	Less frequent than 10%
Amp	chr1:151000002-162000000	LOC100132062	chr1:323891-180755196	Less frequent than 10%
Amp	chr1:151000002-162000000	LOC100132287	chr1:323891-180755196	Less frequent than 10%
Amp	chr1:151000002-162000000	LOC100133331	chr1:323891-180755196	Less frequent than 10%
Amp	chr1:151000002-162000000	OR4F16	chr1:367658-180795226	Less frequent than 10%
Amp	chr1:151000002-162000000	OR4F29	chr1:367658-180795226	Less frequent than 10%
Amp	chr1:151000002-162000000	OR4F3	chr1:367658-180795226	Less frequent than 10%
Amp	chr1:151000002-162000000	SRGAP2D	chr1:121107151-206580068	Less frequent than 10%
Amp	chr3:174000002-198022430	MIR4789	chr3:175087328-175087410	Less frequent than 10%
Amp	chr3:174000002-198022430	DNAJC19	chr3:180701497-180707562	Less frequent than 10%
Amp	chr3:174000002-198022430	SOX2	chr3:181429711-181432223	Less frequent than 10%
Amp	chr3:174000002-198022430	MAP6D1	chr3:183533663-183543393	Less frequent than 10%
Amp	chr3:174000002-198022430	ABCC5-AS1	chr3:183724125-183729207	Less frequent than 10%
Amp	chr3:174000002-198022430	HTR3D	chr3:183749331-183757157	Less frequent than 10%
Amp	chr3:174000002-198022430	HTR3C	chr3:183770834-183778461	Less frequent than 10%
Amp	chr3:174000002-198022430	HTR3E	chr3:183814851-183824783	Less frequent than 10%
Amp	chr3:174000002-198022430	MIR1224	chr3:183959192-183959277	Less frequent than 10%
Amp	chr3:174000002-198022430	ALG3	chr3:183960116-183967313	Less frequent than 10%
Amp	chr3:174000002-198022430	CAMK2N2	chr3:183977002-183979251	Less frequent than 10%
Amp	chr3:174000002-198022430	SNORD66	chr3:184043483-184043559	Less frequent than 10%
Amp	chr3:174000002-198022430	POLR2H	chr3:184079501-184086383	Less frequent than 10%
Amp	chr3:174000002-198022430	MAGEF1	chr3:184428154-184429836	Less frequent than 10%
Amp	chr3:174000002-198022430	TMEM41A	chr3:185207388-185216845	Less frequent than 10%
Amp	chr3:174000002-198022430	CRYGS	chr3:186256231-186262167	Less frequent than 10%
Amp	chr3:174000002-198022430	EIF4A2	chr3:186501360-186507685	Less frequent than 10%
Amp	chr3:174000002-198022430	MIR1248	chr3:186504460-186504566	Less frequent than 10%
Amp	chr3:174000002-198022430	SNORA4	chr3:186505401-186505538	Less frequent than 10%
Amp	chr3:174000002-198022430	SNORA63	chr3:186505087-186505222	Less frequent than 10%
Amp	chr3:174000002-198022430	SNORA81	chr3:186504463-186504641	Less frequent than 10%
Amp	chr3:174000002-198022430	SNORD2	chr3:186502584-186502654	Less frequent than 10%
Amp	chr3:174000002-198022430	ADIPOQ-AS1	chr3:186569675-186573912	Less frequent than 10%
Amp	chr3:174000002-198022430	RTP1	chr3:186915273-186919253	Less frequent than 10%
Amp	chr3:174000002-198022430	SST	chr3:187386693-187388201	Less frequent than 10%
Amp	chr3:174000002-198022430	LPP-AS2	chr3:187868993-187871876	Less frequent than 10%
Amp	chr3:174000002-198022430	FLJ42393	chr3:187896330-187898596	Less frequent than 10%
Amp	chr3:174000002-198022430	MIR944	chr3:189547710-189547798	Less frequent than 10%
Amp	chr3:174000002-198022430	SNAR-I	chr3:190595718-190595839	Less frequent than 10%
Amp	chr3:174000002-198022430	PYDC2	chr3:191178951-191179245	Less frequent than 10%
Amp	chr3:174000002-198022430	MGC2889	chr3:192959567-192961761	Less frequent than 10%
Amp	chr3:174000002-198022430	OPA1-AS1	chr3:193336387-193345121	Less frequent than 10%
Amp	chr3:174000002-198022430	DPPA2P3	chr3:193710882-193712027	Less frequent than 10%
Amp	chr3:174000002-198022430	LINC00884	chr3:194207868-194209274	Less frequent than 10%
Amp	chr3:174000002-198022430	TMEM44-AS1	chr3:194304996-194311561	Less frequent than 10%
Amp	chr3:174000002-198022430	FAM43A	chr3:194406621-194409766	Less frequent than 10%
Amp	chr3:174000002-198022430	XXYLT1-AS1	chr3:194815316-194816786	Less frequent than 10%
Amp	chr3:174000002-198022430	MIR5692C1	chr3:195208644-195208667	Less frequent than 10%
Amp	chr3:174000002-198022430	MIR570	chr3:195426271-195426368	Less frequent than 10%
Amp	chr3:174000002-198022430	C3orf43	chr3:196233749-196242237	Less frequent than 10%
Amp	chr3:174000002-198022430	WDR53	chr3:196281058-196295413	Less frequent than 10%
Amp	chr3:174000002-198022430	CEP19	chr3:196433147-196439123	Less frequent than 10%
Amp	chr3:174000002-198022430	NCBP2	chr3:196662272-196669464	Less frequent than 10%
Amp	chr3:174000002-198022430	NCBP2-AS2	chr3:196669493-196670884	Less frequent than 10%
Amp	chr3:174000002-198022430	MFI2-AS1	chr3:196729776-196731615	Less frequent than 10%
Amp	chr3:174000002-198022430	DLG1-AS1	chr3:197025117-197030621	Less frequent than 10%
Amp	chr3:174000002-198022430	MIR4797	chr3:197020748-197020819	Less frequent than 10%
Amp	chr3:174000002-198022430	MIR922	chr3:197401366-197401447	Less frequent than 10%
Amp	chr3:174000002-198022430	RPL35A	chr3:197677051-197682721	Less frequent than 10%
Amp	chr3:174000002-198022430	NAALADL2-AS3	chr3:174797101-174833032	Less frequent than 10%
Amp	chr3:174000002-198022430	LINC00501	chr3:177012229-177041223	Less frequent than 10%
Amp	chr3:174000002-198022430	LINC01014	chr3:178136988-178175093	Less frequent than 10%
Amp	chr3:174000002-198022430	KCNMB3	chr3:178957536-178984838	Less frequent than 10%
Amp	chr3:174000002-198022430	GNB4	chr3:179113875-179169371	Less frequent than 10%
Amp	chr3:174000002-198022430	MFN1	chr3:179065479-179111008	Less frequent than 10%
Amp	chr3:174000002-198022430	ACTL6A	chr3:179280707-179306193	Less frequent than 10%
Amp	chr3:174000002-198022430	NDUFB5	chr3:179322574-179342288	Less frequent than 10%
Amp	chr3:174000002-198022430	TTC14	chr3:180319917-180328918	Less frequent than 10%
Amp	chr3:174000002-198022430	FXR1	chr3:180630233-180700539	Less frequent than 10%
Amp	chr3:174000002-198022430	LOC100996490	chr3:181670151-181728464	Less frequent than 10%
Amp	chr3:174000002-198022430	DCUN1D1	chr3:182660558-182698326	Less frequent than 10%
Amp	chr3:174000002-198022430	MCCC1	chr3:182733005-182817365	Less frequent than 10%
Amp	chr3:174000002-198022430	LINC00888	chr3:183165395-183173800	Less frequent than 10%
Amp	chr3:174000002-198022430	PARL	chr3:183547172-183602693	Less frequent than 10%
Amp	chr3:174000002-198022430	ABCC5	chr3:183637723-183735727	Less frequent than 10%
Amp	chr3:174000002-198022430	DVL3	chr3:183873283-183891314	Less frequent than 10%
Amp	chr3:174000002-198022430	EIF2B5	chr3:183852809-183863099	Less frequent than 10%
Amp	chr3:174000002-198022430	ABCF3	chr3:183903862-183911795	Less frequent than 10%
Amp	chr3:174000002-198022430	ECE2	chr3:183967444-184010819	Less frequent than 10%
Amp	chr3:174000002-198022430	VWA5B2	chr3:183948316-183960117	Less frequent than 10%
Amp	chr3:174000002-198022430	CHRD	chr3:184097860-184107617	Less frequent than 10%
Amp	chr3:174000002-198022430	CLCN2	chr3:184063972-184079439	Less frequent than 10%
Amp	chr3:174000002-198022430	EIF4G1	chr3:184032282-184053146	Less frequent than 10%
Amp	chr3:174000002-198022430	FAM131A	chr3:184053716-184064063	Less frequent than 10%
Amp	chr3:174000002-198022430	THPO	chr3:184089772-184095932	Less frequent than 10%
Amp	chr3:174000002-198022430	EHHADH-AS1	chr3:184880688-184909743	Less frequent than 10%
Amp	chr3:174000002-198022430	LIPH	chr3:185225569-185270369	Less frequent than 10%
Amp	chr3:174000002-198022430	C3orf65	chr3:185431039-185435955	Less frequent than 10%
Amp	chr3:174000002-198022430	LOC344887	chr3:185677757-185698665	Less frequent than 10%
Amp	chr3:174000002-198022430	TRA2B	chr3:185632357-185655924	Less frequent than 10%
Amp	chr3:174000002-198022430	ETV5	chr3:185764105-185826901	Less frequent than 10%
Amp	chr3:174000002-198022430	LOC253573	chr3:186172769-186211450	Less frequent than 10%
Amp	chr3:174000002-198022430	AHSG	chr3:186330849-186339107	Less frequent than 10%
Amp	chr3:174000002-198022430	DNAJB11	chr3:186288466-186303589	Less frequent than 10%
Amp	chr3:174000002-198022430	FETUB	chr3:186358148-186370797	Less frequent than 10%
Amp	chr3:174000002-198022430	TBCCD1	chr3:186263855-186288332	Less frequent than 10%
Amp	chr3:174000002-198022430	KNG1	chr3:186435097-186462199	Less frequent than 10%
Amp	chr3:174000002-198022430	ADIPOQ	chr3:186560462-186576252	Less frequent than 10%
Amp	chr3:174000002-198022430	RPL39L	chr3:186838740-186857263	Less frequent than 10%
Amp	chr3:174000002-198022430	MASP1	chr3:186933872-187009810	Less frequent than 10%
Amp	chr3:174000002-198022430	RTP4	chr3:187086167-187089369	Less frequent than 10%
Amp	chr3:174000002-198022430	RTP2	chr3:187416046-187420345	Less frequent than 10%
Amp	chr3:174000002-198022430	BCL6	chr3:187439164-187463513	Less frequent than 10%
Amp	chr3:174000002-198022430	TPRG1-AS2	chr3:188956474-188958383	Less frequent than 10%
Amp	chr3:174000002-198022430	CLDN1	chr3:190023489-190040235	Less frequent than 10%
Amp	chr3:174000002-198022430	CLDN16	chr3:190105660-190129932	Less frequent than 10%
Amp	chr3:174000002-198022430	TMEM207	chr3:190146443-190167665	Less frequent than 10%
Amp	chr3:174000002-198022430	OSTN	chr3:190930321-190967910	Less frequent than 10%
Amp	chr3:174000002-198022430	UTS2B	chr3:190984943-191048325	Less frequent than 10%
Amp	chr3:174000002-198022430	HRASLS	chr3:192958916-192988644	Less frequent than 10%
Amp	chr3:174000002-198022430	LOC647323	chr3:193675160-193721448	Less frequent than 10%
Amp	chr3:174000002-198022430	CPN2	chr3:194060493-194072057	Less frequent than 10%
Amp	chr3:174000002-198022430	LINC00887	chr3:194018988-194030593	Less frequent than 10%
Amp	chr3:174000002-198022430	LRRC15	chr3:194075975-194090472	Less frequent than 10%
Amp	chr3:174000002-198022430	ATP13A3	chr3:194123402-194188968	Less frequent than 10%
Amp	chr3:174000002-198022430	TMEM44	chr3:194308401-194354150	Less frequent than 10%
Amp	chr3:174000002-198022430	LOC100507391	chr3:194429149-194502897	Less frequent than 10%
Amp	chr3:174000002-198022430	XXYLT1-AS2	chr3:194868599-194873585	Less frequent than 10%
Amp	chr3:174000002-198022430	PPP1R2	chr3:195241220-195270224	Less frequent than 10%
Amp	chr3:174000002-198022430	SDHAP2	chr3:195384909-195415735	Less frequent than 10%
Amp	chr3:174000002-198022430	MUC20	chr3:195447752-195464540	Less frequent than 10%
Amp	chr3:174000002-198022430	MUC4	chr3:195473637-195538844	Less frequent than 10%
Amp	chr3:174000002-198022430	TNK2	chr3:195590235-195635880	Less frequent than 10%
Amp	chr3:174000002-198022430	TFRC	chr3:195776154-195809032	Less frequent than 10%
Amp	chr3:174000002-198022430	LINC00885	chr3:195869506-195887761	Less frequent than 10%
Amp	chr3:174000002-198022430	ZDHHC19	chr3:195924322-195938300	Less frequent than 10%
Amp	chr3:174000002-198022430	PCYT1A	chr3:195965252-196014584	Less frequent than 10%
Amp	chr3:174000002-198022430	TCTEX1D2	chr3:196018089-196045165	Less frequent than 10%
Amp	chr3:174000002-198022430	TM4SF19	chr3:196050416-196065291	Less frequent than 10%
Amp	chr3:174000002-198022430	TM4SF19-TCTEX1D2	chr3:196042955-196065291	Less frequent than 10%
Amp	chr3:174000002-198022430	FBXO45	chr3:196295724-196315930	Less frequent than 10%
Amp	chr3:174000002-198022430	NRROS	chr3:196366655-196388874	Less frequent than 10%
Amp	chr3:174000002-198022430	PIGX	chr3:196439244-196462876	Less frequent than 10%
Amp	chr3:174000002-198022430	PIGZ	chr3:196673213-196695742	Less frequent than 10%
Amp	chr3:174000002-198022430	LOC220729	chr3:197340897-197354752	Less frequent than 10%
Amp	chr3:174000002-198022430	FYTTD1	chr3:197476423-197511317	Less frequent than 10%
Amp	chr3:174000002-198022430	KIAA0226	chr3:197398258-197476568	Less frequent than 10%
Amp	chr3:174000002-198022430	LMLN	chr3:197687070-197770591	Less frequent than 10%
Amp	chr3:174000002-198022430	FAM157A	chr3:197879236-197907728	Less frequent than 10%
Amp	chr3:174000002-198022430	NLGN1	chr3:173116237-174001139	Less frequent than 10%
Amp	chr3:174000002-198022430	TBL1XR1	chr3:176738541-176915048	Less frequent than 10%
Amp	chr3:174000002-198022430	PIK3CA	chr3:178866310-178952497	Less frequent than 10%
Amp	chr3:174000002-198022430	ZMAT3	chr3:178735010-178789656	Less frequent than 10%
Amp	chr3:174000002-198022430	ZNF639	chr3:179041550-179053320	Less frequent than 10%
Amp	chr3:174000002-198022430	PEX5L	chr3:179512746-179754841	Less frequent than 10%
Amp	chr3:174000002-198022430	USP13	chr3:179370932-179507189	Less frequent than 10%
Amp	chr3:174000002-198022430	FLJ46066	chr3:182164757-182204150	Less frequent than 10%
Amp	chr3:174000002-198022430	ATP11B	chr3:182511290-182639421	Less frequent than 10%
Amp	chr3:174000002-198022430	B3GNT5	chr3:182971031-182991179	Less frequent than 10%
Amp	chr3:174000002-198022430	KLHL24	chr3:183353410-183402304	Less frequent than 10%
Amp	chr3:174000002-198022430	KLHL6	chr3:183205318-183273499	Less frequent than 10%
Amp	chr3:174000002-198022430	LAMP3	chr3:182840002-182880667	Less frequent than 10%
Amp	chr3:174000002-198022430	MCF2L2	chr3:182895791-183146057	Less frequent than 10%
Amp	chr3:174000002-198022430	AP2M1	chr3:183892633-183901879	Less frequent than 10%
Amp	chr3:174000002-198022430	EPHB3	chr3:184279586-184300196	Less frequent than 10%
Amp	chr3:174000002-198022430	PSMD2	chr3:184016885-184026842	Less frequent than 10%
Amp	chr3:174000002-198022430	C3orf70	chr3:184795837-184870802	Less frequent than 10%
Amp	chr3:174000002-198022430	EHHADH	chr3:184908411-184971886	Less frequent than 10%
Amp	chr3:174000002-198022430	IGF2BP2	chr3:185361526-185542827	Less frequent than 10%
Amp	chr3:174000002-198022430	MAP3K13	chr3:185000728-185206882	Less frequent than 10%
Amp	chr3:174000002-198022430	SENP2	chr3:185304030-185348885	Less frequent than 10%
Amp	chr3:174000002-198022430	DGKG	chr3:185864989-186080023	Less frequent than 10%
Amp	chr3:174000002-198022430	HRG	chr3:186383746-186396023	Less frequent than 10%
Amp	chr3:174000002-198022430	RFC4	chr3:186507681-186524484	Less frequent than 10%
Amp	chr3:174000002-198022430	LOC100131635	chr3:187420153-187450203	Less frequent than 10%
Amp	chr3:174000002-198022430	ST6GAL1	chr3:186648314-186796341	Less frequent than 10%
Amp	chr3:174000002-198022430	LPP	chr3:187871662-188608460	Less frequent than 10%
Amp	chr3:174000002-198022430	TP63	chr3:189349215-189615068	Less frequent than 10%
Amp	chr3:174000002-198022430	TPRG1	chr3:188889762-189041271	Less frequent than 10%
Amp	chr3:174000002-198022430	GMNC	chr3:190570525-190580465	Less frequent than 10%
Amp	chr3:174000002-198022430	IL1RAP	chr3:190231839-190374986	Less frequent than 10%
Amp	chr3:174000002-198022430	CCDC50	chr3:191046873-191116459	Less frequent than 10%
Amp	chr3:174000002-198022430	MB21D2	chr3:192514604-192635950	Less frequent than 10%
Amp	chr3:174000002-198022430	ATP13A4	chr3:193119865-193272696	Less frequent than 10%
Amp	chr3:174000002-198022430	ATP13A5	chr3:192992830-193096514	Less frequent than 10%
Amp	chr3:174000002-198022430	HES1	chr3:193853930-193856401	Less frequent than 10%
Amp	chr3:174000002-198022430	OPA1	chr3:193310932-193415600	Less frequent than 10%
Amp	chr3:174000002-198022430	GP5	chr3:194115549-194119995	Less frequent than 10%
Amp	chr3:174000002-198022430	LSG1	chr3:194361516-194393206	Less frequent than 10%
Amp	chr3:174000002-198022430	XXYLT1	chr3:194789012-194991895	Less frequent than 10%
Amp	chr3:174000002-198022430	APOD	chr3:195295572-195311076	Less frequent than 10%
Amp	chr3:174000002-198022430	SDHAP1	chr3:195686791-195717150	Less frequent than 10%
Amp	chr3:174000002-198022430	SLC51A	chr3:195943382-195960301	Less frequent than 10%
Amp	chr3:174000002-198022430	DLG1	chr3:196769430-197025447	Less frequent than 10%
Amp	chr3:174000002-198022430	MFI2	chr3:196728611-196756687	Less frequent than 10%
Amp	chr3:174000002-198022430	PAK2	chr3:196466727-196559518	Less frequent than 10%
Amp	chr3:174000002-198022430	RNF168	chr3:196195656-196230639	Less frequent than 10%
Amp	chr3:174000002-198022430	SENP5	chr3:196594726-196661584	Less frequent than 10%
Amp	chr3:174000002-198022430	ANKRD18DP	chr3:197784403-197807542	Less frequent than 10%
Amp	chr3:174000002-198022430	BDH1	chr3:197236653-197300194	Less frequent than 10%
Amp	chr3:174000002-198022430	IQCG	chr3:197615945-197686886	Less frequent than 10%
Amp	chr3:174000002-198022430	LRCH3	chr3:197518144-197598456	Less frequent than 10%
Amp	chr3:174000002-198022430	NAALADL2	chr3:174577110-175523428	Less frequent than 10%
Amp	chr3:174000002-198022430	CCDC39	chr3:180331795-180397283	Less frequent than 10%
Amp	chr3:174000002-198022430	KCNMB2	chr3:178254085-178562217	Less frequent than 10%
Amp	chr3:174000002-198022430	LINC00578	chr3:177159708-177470492	Less frequent than 10%
Amp	chr3:174000002-198022430	MRPL47	chr3:179306254-179322434	Less frequent than 10%
Amp	chr3:174000002-198022430	SOX2-OT	chr3:180774467-181460013	Less frequent than 10%
Amp	chr3:174000002-198022430	YEATS2	chr3:183415605-183530413	Less frequent than 10%
Amp	chr3:174000002-198022430	FGF12	chr3:191857181-192445388	Less frequent than 10%
Amp	chr3:174000002-198022430	LEPREL1	chr3:189674516-189840226	Less frequent than 10%
Amp	chr3:174000002-198022430	ACAP2	chr3:194995464-195163817	Less frequent than 10%
Amp	chr3:174000002-198022430	UBXN7	chr3:196080368-196159345	Less frequent than 10%
Amp	chr3:174000002-198022430	VPS8	chr3:184529930-184770402	Less frequent than 10%
Amp	chr8:125000002-146364022	MIR1204	chr8:128808207-128808274	Less frequent than 10%
Amp	chr8:125000002-146364022	MIR1205	chr8:128972878-128972941	Less frequent than 10%
Amp	chr8:125000002-146364022	MIR1206	chr8:129021143-129021202	Less frequent than 10%
Amp	chr8:125000002-146364022	MIR1207	chr8:129061397-129061484	Less frequent than 10%
Amp	chr8:125000002-146364022	MIR1208	chr8:129162361-129162434	Less frequent than 10%
Amp	chr8:125000002-146364022	MIR5194	chr8:131020579-131020699	Less frequent than 10%
Amp	chr8:125000002-146364022	MIR30B	chr8:135812762-135812850	Less frequent than 10%
Amp	chr8:125000002-146364022	MIR30D	chr8:135817118-135817188	Less frequent than 10%
Amp	chr8:125000002-146364022	LOC731779	chr8:142350647-142354720	Less frequent than 10%
Amp	chr8:125000002-146364022	MIR4472-1	chr8:143257699-143257779	Less frequent than 10%
Amp	chr8:125000002-146364022	LINC00051	chr8:143279716-143290364	Less frequent than 10%
Amp	chr8:125000002-146364022	ARC	chr8:143692404-143695833	Less frequent than 10%
Amp	chr8:125000002-146364022	JRK	chr8:143738873-143751412	Less frequent than 10%
Amp	chr8:125000002-146364022	LY6K	chr8:143781528-143785584	Less frequent than 10%
Amp	chr8:125000002-146364022	THEM6	chr8:143808620-143818350	Less frequent than 10%
Amp	chr8:125000002-146364022	LYPD2	chr8:143831627-143833952	Less frequent than 10%
Amp	chr8:125000002-146364022	SLURP1	chr8:143822361-143823829	Less frequent than 10%
Amp	chr8:125000002-146364022	CYP11B1	chr8:143953772-143961236	Less frequent than 10%
Amp	chr8:125000002-146364022	CDC42P3	chr8:144077244-144079080	Less frequent than 10%
Amp	chr8:125000002-146364022	LY6E	chr8:144099901-144103827	Less frequent than 10%
Amp	chr8:125000002-146364022	LY6H	chr8:144239330-144242053	Less frequent than 10%
Amp	chr8:125000002-146364022	GPIHBP1	chr8:144295067-144299044	Less frequent than 10%
Amp	chr8:125000002-146364022	GLI4	chr8:144349606-144359101	Less frequent than 10%
Amp	chr8:125000002-146364022	RHPN1-AS1	chr8:144448792-144450805	Less frequent than 10%
Amp	chr8:125000002-146364022	MAFA	chr8:144510229-144512602	Less frequent than 10%
Amp	chr8:125000002-146364022	NAPRT1	chr8:144656954-144660513	Less frequent than 10%
Amp	chr8:125000002-146364022	TIGD5	chr8:144680073-144682485	Less frequent than 10%
Amp	chr8:125000002-146364022	TSTA3	chr8:144694787-144699732	Less frequent than 10%
Amp	chr8:125000002-146364022	BREA2	chr8:144779284-144780583	Less frequent than 10%
Amp	chr8:125000002-146364022	CCDC166	chr8:144788863-144790279	Less frequent than 10%
Amp	chr8:125000002-146364022	FAM83H	chr8:144806102-144815914	Less frequent than 10%
Amp	chr8:125000002-146364022	MIR4664	chr8:144815252-144815323	Less frequent than 10%
Amp	chr8:125000002-146364022	MIR937	chr8:144895126-144895212	Less frequent than 10%
Amp	chr8:125000002-146364022	MIR661	chr8:145019358-145019447	Less frequent than 10%
Amp	chr8:125000002-146364022	PARP10	chr8:145051319-145060635	Less frequent than 10%
Amp	chr8:125000002-146364022	GRINA	chr8:145064225-145067583	Less frequent than 10%
Amp	chr8:125000002-146364022	EXOSC4	chr8:145133521-145135551	Less frequent than 10%
Amp	chr8:125000002-146364022	GPAA1	chr8:145137523-145141119	Less frequent than 10%
Amp	chr8:125000002-146364022	CYC1	chr8:145149959-145152428	Less frequent than 10%
Amp	chr8:125000002-146364022	SHARPIN	chr8:145153535-145159140	Less frequent than 10%
Amp	chr8:125000002-146364022	KIAA1875	chr8:145162628-145173218	Less frequent than 10%
Amp	chr8:125000002-146364022	FBXL6	chr8:145579087-145582183	Less frequent than 10%
Amp	chr8:125000002-146364022	SLC52A2	chr8:145582216-145584948	Less frequent than 10%
Amp	chr8:125000002-146364022	TMEM249	chr8:145576885-145579269	Less frequent than 10%
Amp	chr8:125000002-146364022	MIR939	chr8:145619363-145619445	Less frequent than 10%
Amp	chr8:125000002-146364022	MIR1234	chr8:145625475-145625559	Less frequent than 10%
Amp	chr8:125000002-146364022	SLC39A4	chr8:145637797-145642279	Less frequent than 10%
Amp	chr8:125000002-146364022	TONSL	chr8:145654162-145669812	Less frequent than 10%
Amp	chr8:125000002-146364022	FOXH1	chr8:145699114-145701718	Less frequent than 10%
Amp	chr8:125000002-146364022	KIFC2	chr8:145691737-145699499	Less frequent than 10%
Amp	chr8:125000002-146364022	GPT	chr8:145729464-145732555	Less frequent than 10%
Amp	chr8:125000002-146364022	PPP1R16A	chr8:145722108-145727504	Less frequent than 10%
Amp	chr8:125000002-146364022	LRRC14	chr8:145743348-145750559	Less frequent than 10%
Amp	chr8:125000002-146364022	RECQL4	chr8:145736666-145743210	Less frequent than 10%
Amp	chr8:125000002-146364022	ZNF34	chr8:145998500-146012725	Less frequent than 10%
Amp	chr8:125000002-146364022	RPL8	chr8:146015153-146017805	Less frequent than 10%
Amp	chr8:125000002-146364022	COMMD5	chr8:146075550-146078932	Less frequent than 10%
Amp	chr8:125000002-146364022	TMED10P1	chr8:146220250-146224283	Less frequent than 10%
Amp	chr8:125000002-146364022	ZNF252P-AS1	chr8:146228196-146231432	Less frequent than 10%
Amp	chr8:125000002-146364022	C8orf33	chr8:146277823-146281416	Less frequent than 10%
Amp	chr8:125000002-146364022	TMEM65	chr8:125323158-125384940	Less frequent than 10%
Amp	chr8:125000002-146364022	FAM84B	chr8:127564682-127570711	Less frequent than 10%
Amp	chr8:125000002-146364022	ZFAT-AS1	chr8:135610313-135612932	Less frequent than 10%
Amp	chr8:125000002-146364022	LOC286094	chr8:136246373-136311962	Less frequent than 10%
Amp	chr8:125000002-146364022	CHRAC1	chr8:141521396-141527252	Less frequent than 10%
Amp	chr8:125000002-146364022	DENND3	chr8:142138719-142205900	Less frequent than 10%
Amp	chr8:125000002-146364022	SLC45A4	chr8:142220869-142238673	Less frequent than 10%
Amp	chr8:125000002-146364022	GPR20	chr8:142366586-142377365	Less frequent than 10%
Amp	chr8:125000002-146364022	PTP4A3	chr8:142431487-142442554	Less frequent than 10%
Amp	chr8:125000002-146364022	BAI1	chr8:143545376-143626368	Less frequent than 10%
Amp	chr8:125000002-146364022	PSCA	chr8:143751725-143764145	Less frequent than 10%
Amp	chr8:125000002-146364022	LY6D	chr8:143866297-143868008	Less frequent than 10%
Amp	chr8:125000002-146364022	LYNX1	chr8:143845755-143859640	Less frequent than 10%
Amp	chr8:125000002-146364022	CYP11B2	chr8:143991974-143999259	Less frequent than 10%
Amp	chr8:125000002-146364022	C8orf31	chr8:144120678-144135720	Less frequent than 10%
Amp	chr8:125000002-146364022	LOC100133669	chr8:144063447-144099807	Less frequent than 10%
Amp	chr8:125000002-146364022	ZFP41	chr8:144328990-144344875	Less frequent than 10%
Amp	chr8:125000002-146364022	ZNF696	chr8:144373558-144382120	Less frequent than 10%
Amp	chr8:125000002-146364022	RHPN1	chr8:144451024-144466390	Less frequent than 10%
Amp	chr8:125000002-146364022	EEF1D	chr8:144661866-144679845	Less frequent than 10%
Amp	chr8:125000002-146364022	GSDMD	chr8:144635556-144645231	Less frequent than 10%
Amp	chr8:125000002-146364022	MROH6	chr8:144648362-144654928	Less frequent than 10%
Amp	chr8:125000002-146364022	PYCRL	chr8:144686082-144691784	Less frequent than 10%
Amp	chr8:125000002-146364022	FAM83H-AS1	chr8:144816309-144828507	Less frequent than 10%
Amp	chr8:125000002-146364022	MAPK15	chr8:144798506-144804633	Less frequent than 10%
Amp	chr8:125000002-146364022	ZNF623	chr8:144718182-144735900	Less frequent than 10%
Amp	chr8:125000002-146364022	ZNF707	chr8:144766621-144777555	Less frequent than 10%
Amp	chr8:125000002-146364022	EPPK1	chr8:144939491-144952632	Less frequent than 10%
Amp	chr8:125000002-146364022	NRBP2	chr8:144915754-144923146	Less frequent than 10%
Amp	chr8:125000002-146364022	PUF60	chr8:144898513-144911556	Less frequent than 10%
Amp	chr8:125000002-146364022	SCRIB	chr8:144873089-144897549	Less frequent than 10%
Amp	chr8:125000002-146364022	PLEC	chr8:144989320-145050913	Less frequent than 10%
Amp	chr8:125000002-146364022	MAF1	chr8:145159304-145162515	Less frequent than 10%
Amp	chr8:125000002-146364022	OPLAH	chr8:145106166-145115584	Less frequent than 10%
Amp	chr8:125000002-146364022	ADCK5	chr8:145597703-145618453	Less frequent than 10%
Amp	chr8:125000002-146364022	DGAT1	chr8:145538245-145550582	Less frequent than 10%
Amp	chr8:125000002-146364022	HSF1	chr8:145515269-145538385	Less frequent than 10%
Amp	chr8:125000002-146364022	SCRT1	chr8:145554227-145559943	Less frequent than 10%
Amp	chr8:125000002-146364022	CYHR1	chr8:145675314-145691031	Less frequent than 10%
Amp	chr8:125000002-146364022	MFSD3	chr8:145734551-145736589	Less frequent than 10%
Amp	chr8:125000002-146364022	VPS28	chr8:145648983-145653946	Less frequent than 10%
Amp	chr8:125000002-146364022	ARHGAP39	chr8:145754562-145838888	Less frequent than 10%
Amp	chr8:125000002-146364022	ZNF251	chr8:145946293-145980970	Less frequent than 10%
Amp	chr8:125000002-146364022	ZNF250	chr8:146102335-146126846	Less frequent than 10%
Amp	chr8:125000002-146364022	ZNF517	chr8:146024260-146034529	Less frequent than 10%
Amp	chr8:125000002-146364022	ZNF7	chr8:146052902-146072893	Less frequent than 10%
Amp	chr8:125000002-146364022	ZNF16	chr8:146155743-146176274	Less frequent than 10%
Amp	chr8:125000002-146364022	ZNF252P	chr8:146198974-146228285	Less frequent than 10%
Amp	chr8:125000002-146364022	FER1L6	chr8:124864226-125132302	Less frequent than 10%
Amp	chr8:125000002-146364022	FER1L6-AS1	chr8:124996377-125053023	Less frequent than 10%
Amp	chr8:125000002-146364022	FER1L6-AS2	chr8:125058311-125183763	Less frequent than 10%
Amp	chr8:125000002-146364022	KIAA0196	chr8:126036502-126104061	Less frequent than 10%
Amp	chr8:125000002-146364022	ZFAT	chr8:135490030-135725292	Less frequent than 10%
Amp	chr8:125000002-146364022	KHDRBS3	chr8:136469715-136659848	Less frequent than 10%
Amp	chr8:125000002-146364022	COL22A1	chr8:139600477-139926236	Less frequent than 10%
Amp	chr8:125000002-146364022	KCNK9	chr8:140613080-140715299	Less frequent than 10%
Amp	chr8:125000002-146364022	TRAPPC9	chr8:140742585-141468678	Less frequent than 10%
Amp	chr8:125000002-146364022	MROH5	chr8:142443928-142517330	Less frequent than 10%
Amp	chr8:125000002-146364022	PTK2	chr8:141668480-142011412	Less frequent than 10%
Amp	chr8:125000002-146364022	TSNARE1	chr8:143293440-143484543	Less frequent than 10%
Amp	chr8:125000002-146364022	GML	chr8:143916216-143928262	Less frequent than 10%
Amp	chr8:125000002-146364022	LOC100288181	chr8:143783669-143808391	Less frequent than 10%
Amp	chr8:125000002-146364022	TOP1MT	chr8:144391496-144442147	Less frequent than 10%
Amp	chr8:125000002-146364022	ZC3H3	chr8:144519824-144623620	Less frequent than 10%
Amp	chr8:125000002-146364022	BOP1	chr8:145486055-145515120	Less frequent than 10%
Amp	chr8:125000002-146364022	CPSF1	chr8:145618445-145634733	Less frequent than 10%
Amp	chr8:125000002-146364022	FAM203A	chr8:145192671-145440828	Less frequent than 10%
Amp	chr8:125000002-146364022	MROH1	chr8:145202918-145316843	Less frequent than 10%
Amp	chr8:125000002-146364022	SCXA	chr8:145321516-145492131	Less frequent than 10%
Amp	chr8:125000002-146364022	SCXB	chr8:145321516-145492131	Less frequent than 10%
Amp	chr8:125000002-146364022	SPATC1	chr8:145086581-145102015	Less frequent than 10%
Amp	chr8:125000002-146364022	AGO2	chr8:141541263-141645646	Less frequent than 10%
Amp	chr8:125000002-146364022	FAM135B	chr8:139142265-139509065	Less frequent than 10%
Amp	chr8:125000002-146364022	C8orf82	chr8:145751602-145754458	Less frequent than 10%
Amp	chr8:125000002-146364022	LRRC24	chr8:145747760-145752416	Less frequent than 10%
Amp	chr8:125000002-146364022	WISP1	chr8:134203281-134243932	Less frequent than 10%
Amp	chr12:24000002-27000000	MIR920	chr12:24365354-24365429	Less frequent than 10%
Amp	chr12:24000002-27000000	LYRM5	chr12:25348149-25357949	Less frequent than 10%
Amp	chr12:24000002-27000000	MIR4302	chr12:26026952-26027012	Less frequent than 10%
Amp	chr12:24000002-27000000	RASSF8-AS1	chr12:26107587-26112375	Less frequent than 10%
Amp	chr12:24000002-27000000	BHLHE41	chr12:26272958-26278003	Less frequent than 10%
Amp	chr12:24000002-27000000	LINC00477	chr12:24719897-24737102	Less frequent than 10%
Amp	chr12:24000002-27000000	C12orf77	chr12:25146364-25150373	Less frequent than 10%
Amp	chr12:24000002-27000000	LRMP	chr12:25205180-25261269	Less frequent than 10%
Amp	chr12:24000002-27000000	KRAS	chr12:25358179-25403854	Less frequent than 10%
Amp	chr12:24000002-27000000	SSPN	chr12:26348268-26387708	Less frequent than 10%
Amp	chr12:24000002-27000000	BCAT1	chr12:24962957-25102393	Less frequent than 10%
Amp	chr12:24000002-27000000	CASC1	chr12:25261222-25348094	Less frequent than 10%
Amp	chr12:24000002-27000000	IFLTD1	chr12:25629015-25801496	Less frequent than 10%
Amp	chr12:24000002-27000000	ITPR2	chr12:26488284-26986131	Less frequent than 10%
Amp	chr12:24000002-27000000	SOX5	chr12:23685230-24715383	Less frequent than 10%
Amp	chr12:24000002-27000000	RASSF8	chr12:26111963-26232825	Less frequent than 10%
Amp	chr12:24000002-27000000	MIR1244-1	chr12:9392065-232578105	Less frequent than 10%
Amp	chr12:24000002-27000000	MIR1244-2	chr12:9392065-232578105	Less frequent than 10%
Amp	chr12:24000002-27000000	MIR1244-3	chr12:9392065-232578105	Less frequent than 10%
Amp	chr12:24000002-27000000	RNU6-19P	chr12:11944823-76737476	Less frequent than 10%
Amp	chr12:24000002-27000000	ZNF26	chr12:93509-133589154	Less frequent than 10%
Amp	chr12:24000002-27000000	ZNF84	chr12:42779-133639885	Less frequent than 10%
Amp	chr19:31000002-59128983	DKFZp566F0947	chr19:31640782-31641311	Less frequent than 10%
Amp	chr19:31000002-59128983	PDCD5	chr19:33072093-33078358	Less frequent than 10%
Amp	chr19:31000002-59128983	RGS9BP	chr19:33166312-33169206	Less frequent than 10%
Amp	chr19:31000002-59128983	C19orf40	chr19:33463147-33467960	Less frequent than 10%
Amp	chr19:31000002-59128983	LRP3	chr19:33685598-33699773	Less frequent than 10%
Amp	chr19:31000002-59128983	CEBPA	chr19:33790839-33793470	Less frequent than 10%
Amp	chr19:31000002-59128983	CEBPA-AS1	chr19:33793762-33795963	Less frequent than 10%
Amp	chr19:31000002-59128983	SCGB1B2P	chr19:35067637-35068596	Less frequent than 10%
Amp	chr19:31000002-59128983	SCGB2B2	chr19:35084345-35085490	Less frequent than 10%
Amp	chr19:31000002-59128983	SCGB2B3P	chr19:35136777-35136957	Less frequent than 10%
Amp	chr19:31000002-59128983	ZNF792	chr19:35447257-35454953	Less frequent than 10%
Amp	chr19:31000002-59128983	SCN1B	chr19:35521591-35531353	Less frequent than 10%
Amp	chr19:31000002-59128983	FXYD3	chr19:35606731-35615228	Less frequent than 10%
Amp	chr19:31000002-59128983	FXYD1	chr19:35629692-35633959	Less frequent than 10%
Amp	chr19:31000002-59128983	HAMP	chr19:35773409-35776045	Less frequent than 10%
Amp	chr19:31000002-59128983	FFAR1	chr19:35842444-35843367	Less frequent than 10%
Amp	chr19:31000002-59128983	MIR5196	chr19:35836415-35836530	Less frequent than 10%
Amp	chr19:31000002-59128983	FFAR3	chr19:35849487-35851389	Less frequent than 10%
Amp	chr19:31000002-59128983	FFAR2	chr19:35940616-35942669	Less frequent than 10%
Amp	chr19:31000002-59128983	SBSN	chr19:36014268-36019253	Less frequent than 10%
Amp	chr19:31000002-59128983	LOC100506469	chr19:36031639-36036931	Less frequent than 10%
Amp	chr19:31000002-59128983	TMEM147	chr19:36036501-36038429	Less frequent than 10%
Amp	chr19:31000002-59128983	ETV2	chr19:36132646-36135773	Less frequent than 10%
Amp	chr19:31000002-59128983	ZBTB32	chr19:36203829-36207940	Less frequent than 10%
Amp	chr19:31000002-59128983	IGFLR1	chr19:36230150-36233351	Less frequent than 10%
Amp	chr19:31000002-59128983	PSENEN	chr19:36236477-36238056	Less frequent than 10%
Amp	chr19:31000002-59128983	U2AF1L4	chr19:36233427-36236336	Less frequent than 10%
Amp	chr19:31000002-59128983	HSPB6	chr19:36245466-36247930	Less frequent than 10%
Amp	chr19:31000002-59128983	LOC644050	chr19:36279777-36288811	Less frequent than 10%
Amp	chr19:31000002-59128983	PRODH2	chr19:36290891-36304201	Less frequent than 10%
Amp	chr19:31000002-59128983	APLP1	chr19:36359400-36370699	Less frequent than 10%
Amp	chr19:31000002-59128983	HCST	chr19:36393381-36395173	Less frequent than 10%
Amp	chr19:31000002-59128983	TYROBP	chr19:36395302-36399211	Less frequent than 10%
Amp	chr19:31000002-59128983	LRFN3	chr19:36428021-36436097	Less frequent than 10%
Amp	chr19:31000002-59128983	SYNE4	chr19:36494001-36499672	Less frequent than 10%
Amp	chr19:31000002-59128983	OVOL3	chr19:36602104-36604613	Less frequent than 10%
Amp	chr19:31000002-59128983	POLR2I	chr19:36604610-36606206	Less frequent than 10%
Amp	chr19:31000002-59128983	TBCB	chr19:36605887-36616849	Less frequent than 10%
Amp	chr19:31000002-59128983	COX7A1	chr19:36641823-36643771	Less frequent than 10%
Amp	chr19:31000002-59128983	LOC100134317	chr19:36802244-36803570	Less frequent than 10%
Amp	chr19:31000002-59128983	LOC728752	chr19:36980528-36981942	Less frequent than 10%
Amp	chr19:31000002-59128983	LOC284412	chr19:37756840-37759912	Less frequent than 10%
Amp	chr19:31000002-59128983	LOC644554	chr19:38308050-38317278	Less frequent than 10%
Amp	chr19:31000002-59128983	PPP1R14A	chr19:38741876-38747231	Less frequent than 10%
Amp	chr19:31000002-59128983	C19orf33	chr19:38794803-38795646	Less frequent than 10%
Amp	chr19:31000002-59128983	GGN	chr19:38874991-38878668	Less frequent than 10%
Amp	chr19:31000002-59128983	PSMD8	chr19:38865189-38874464	Less frequent than 10%
Amp	chr19:31000002-59128983	SPRED3	chr19:38880839-38890523	Less frequent than 10%
Amp	chr19:31000002-59128983	LGALS7	chr19:39261607-39264157	Less frequent than 10%
Amp	chr19:31000002-59128983	LGALS7B	chr19:39279849-39282394	Less frequent than 10%
Amp	chr19:31000002-59128983	LGALS4	chr19:39292310-39303740	Less frequent than 10%
Amp	chr19:31000002-59128983	RINL	chr19:39358471-39368919	Less frequent than 10%
Amp	chr19:31000002-59128983	LOC643669	chr19:39399619-39402798	Less frequent than 10%
Amp	chr19:31000002-59128983	NFKBIB	chr19:39390339-39399534	Less frequent than 10%
Amp	chr19:31000002-59128983	MRPS12	chr19:39421347-39423659	Less frequent than 10%
Amp	chr19:31000002-59128983	NCCRP1	chr19:39687603-39692522	Less frequent than 10%
Amp	chr19:31000002-59128983	SYCN	chr19:39693561-39694906	Less frequent than 10%
Amp	chr19:31000002-59128983	IFNL3	chr19:39734271-39735611	Less frequent than 10%
Amp	chr19:31000002-59128983	IFNL4	chr19:39736953-39739496	Less frequent than 10%
Amp	chr19:31000002-59128983	IFNL2	chr19:39759156-39760732	Less frequent than 10%
Amp	chr19:31000002-59128983	IFNL1	chr19:39786964-39789312	Less frequent than 10%
Amp	chr19:31000002-59128983	LRFN1	chr19:39797456-39805976	Less frequent than 10%
Amp	chr19:31000002-59128983	GMFG	chr19:39818998-39826726	Less frequent than 10%
Amp	chr19:31000002-59128983	MED29	chr19:39881962-39891203	Less frequent than 10%
Amp	chr19:31000002-59128983	MIR4530	chr19:39900262-39900318	Less frequent than 10%
Amp	chr19:31000002-59128983	ZFP36	chr19:39897486-39900052	Less frequent than 10%
Amp	chr19:31000002-59128983	RPS16	chr19:39923846-39926618	Less frequent than 10%
Amp	chr19:31000002-59128983	EID2B	chr19:40021629-40023494	Less frequent than 10%
Amp	chr19:31000002-59128983	EID2	chr19:40029446-40030838	Less frequent than 10%
Amp	chr19:31000002-59128983	LGALS13	chr19:40093168-40098114	Less frequent than 10%
Amp	chr19:31000002-59128983	LOC100129935	chr19:40129324-40133041	Less frequent than 10%
Amp	chr19:31000002-59128983	LGALS16	chr19:40146557-40151287	Less frequent than 10%
Amp	chr19:31000002-59128983	LGALS14	chr19:40194945-40200088	Less frequent than 10%
Amp	chr19:31000002-59128983	FBL	chr19:40325092-40337054	Less frequent than 10%
Amp	chr19:31000002-59128983	TTC9B	chr19:40721964-40724306	Less frequent than 10%
Amp	chr19:31000002-59128983	MIR641	chr19:40788449-40788548	Less frequent than 10%
Amp	chr19:31000002-59128983	SERTAD1	chr19:40928408-40931932	Less frequent than 10%
Amp	chr19:31000002-59128983	SERTAD3	chr19:40946747-40950282	Less frequent than 10%
Amp	chr19:31000002-59128983	MIA	chr19:41281081-41283398	Less frequent than 10%
Amp	chr19:31000002-59128983	EGLN2	chr19:41305047-41314346	Less frequent than 10%
Amp	chr19:31000002-59128983	CYP2S1	chr19:41699114-41713444	Less frequent than 10%
Amp	chr19:31000002-59128983	B3GNT8	chr19:41931263-41934635	Less frequent than 10%
Amp	chr19:31000002-59128983	C19orf69	chr19:41949062-41950670	Less frequent than 10%
Amp	chr19:31000002-59128983	CEACAM4	chr19:42125343-42133442	Less frequent than 10%
Amp	chr19:31000002-59128983	LYPD4	chr19:42341149-42348508	Less frequent than 10%
Amp	chr19:31000002-59128983	RABAC1	chr19:42460832-42463528	Less frequent than 10%
Amp	chr19:31000002-59128983	LOC100505622	chr19:42636780-42641251	Less frequent than 10%
Amp	chr19:31000002-59128983	MIR4323	chr19:42637596-42637665	Less frequent than 10%
Amp	chr19:31000002-59128983	ERF	chr19:42751716-42759309	Less frequent than 10%
Amp	chr19:31000002-59128983	PAFAH1B3	chr19:42801184-42806952	Less frequent than 10%
Amp	chr19:31000002-59128983	PSG8	chr19:43256838-43269831	Less frequent than 10%
Amp	chr19:31000002-59128983	LOC100289650	chr19:43326014-43331030	Less frequent than 10%
Amp	chr19:31000002-59128983	PSG1	chr19:43370612-43383871	Less frequent than 10%
Amp	chr19:31000002-59128983	PSG4	chr19:43696853-43709926	Less frequent than 10%
Amp	chr19:31000002-59128983	PRG1	chr19:43853207-43853700	Less frequent than 10%
Amp	chr19:31000002-59128983	LYPD3	chr19:43964945-43969831	Less frequent than 10%
Amp	chr19:31000002-59128983	PINLYP	chr19:44080951-44086256	Less frequent than 10%
Amp	chr19:31000002-59128983	ZNF576	chr19:44100543-44104587	Less frequent than 10%
Amp	chr19:31000002-59128983	SRRM5	chr19:44116252-44118650	Less frequent than 10%
Amp	chr19:31000002-59128983	KCNN4	chr19:44270684-44285409	Less frequent than 10%
Amp	chr19:31000002-59128983	ZNF224	chr19:44598481-44612479	Less frequent than 10%
Amp	chr19:31000002-59128983	MIR4531	chr19:45156955-45157002	Less frequent than 10%
Amp	chr19:31000002-59128983	APOE	chr19:45409038-45412650	Less frequent than 10%
Amp	chr19:31000002-59128983	APOC1	chr19:45417920-45422606	Less frequent than 10%
Amp	chr19:31000002-59128983	APOC4	chr19:45445494-45448753	Less frequent than 10%
Amp	chr19:31000002-59128983	APOC2	chr19:45449238-45452822	Less frequent than 10%
Amp	chr19:31000002-59128983	ZNF296	chr19:45574757-45579688	Less frequent than 10%
Amp	chr19:31000002-59128983	GEMIN7	chr19:45582517-45594782	Less frequent than 10%
Amp	chr19:31000002-59128983	BLOC1S3	chr19:45682002-45685058	Less frequent than 10%
Amp	chr19:31000002-59128983	KLC3	chr19:45843997-45854778	Less frequent than 10%
Amp	chr19:31000002-59128983	CD3EAP	chr19:45909466-45914024	Less frequent than 10%
Amp	chr19:31000002-59128983	PPM1N	chr19:46001730-46005764	Less frequent than 10%
Amp	chr19:31000002-59128983	LOC100287177	chr19:46144904-46146092	Less frequent than 10%
Amp	chr19:31000002-59128983	MIR330	chr19:46142251-46142345	Less frequent than 10%
Amp	chr19:31000002-59128983	GIPR	chr19:46171501-46185717	Less frequent than 10%
Amp	chr19:31000002-59128983	MIR642A	chr19:46178185-46178282	Less frequent than 10%
Amp	chr19:31000002-59128983	MIR642B	chr19:46178189-46178266	Less frequent than 10%
Amp	chr19:31000002-59128983	SNRPD2	chr19:46190711-46195443	Less frequent than 10%
Amp	chr19:31000002-59128983	DMWD	chr19:46286263-46296060	Less frequent than 10%
Amp	chr19:31000002-59128983	FOXA3	chr19:46367517-46377055	Less frequent than 10%
Amp	chr19:31000002-59128983	IRF2BP1	chr19:46386865-46389376	Less frequent than 10%
Amp	chr19:31000002-59128983	NANOS2	chr19:46416472-46418036	Less frequent than 10%
Amp	chr19:31000002-59128983	MIR769	chr19:46522189-46522307	Less frequent than 10%
Amp	chr19:31000002-59128983	PGLYRP1	chr19:46522411-46526556	Less frequent than 10%
Amp	chr19:31000002-59128983	IGFL4	chr19:46543005-46544274	Less frequent than 10%
Amp	chr19:31000002-59128983	IGFL3	chr19:46623327-46627931	Less frequent than 10%
Amp	chr19:31000002-59128983	DKFZp434J0226	chr19:46713498-46718094	Less frequent than 10%
Amp	chr19:31000002-59128983	IGFL1	chr19:46733008-46734500	Less frequent than 10%
Amp	chr19:31000002-59128983	CCDC8	chr19:46913585-46916919	Less frequent than 10%
Amp	chr19:31000002-59128983	PNMAL2	chr19:46994447-46999169	Less frequent than 10%
Amp	chr19:31000002-59128983	CALM3	chr19:47104511-47114039	Less frequent than 10%
Amp	chr19:31000002-59128983	PTGIR	chr19:47123724-47128354	Less frequent than 10%
Amp	chr19:31000002-59128983	GNG8	chr19:47137332-47137939	Less frequent than 10%
Amp	chr19:31000002-59128983	MIR320E	chr19:47212549-47212602	Less frequent than 10%
Amp	chr19:31000002-59128983	SNAR-E	chr19:47333841-47333961	Less frequent than 10%
Amp	chr19:31000002-59128983	TMEM160	chr19:47549166-47551882	Less frequent than 10%
Amp	chr19:31000002-59128983	MIR3190	chr19:47730198-47730278	Less frequent than 10%
Amp	chr19:31000002-59128983	MIR3191	chr19:47730200-47730276	Less frequent than 10%
Amp	chr19:31000002-59128983	CCDC9	chr19:47759730-47775210	Less frequent than 10%
Amp	chr19:31000002-59128983	PRR24	chr19:47777658-47778980	Less frequent than 10%
Amp	chr19:31000002-59128983	KPTN	chr19:47978399-47987521	Less frequent than 10%
Amp	chr19:31000002-59128983	SNORD23	chr19:48259109-48259219	Less frequent than 10%
Amp	chr19:31000002-59128983	TPRX1	chr19:48304499-48306861	Less frequent than 10%
Amp	chr19:31000002-59128983	SNAR-C4	chr19:48442797-48442917	Less frequent than 10%
Amp	chr19:31000002-59128983	SNAR-C3	chr19:48453552-48453671	Less frequent than 10%
Amp	chr19:31000002-59128983	LOC100505812	chr19:48758931-48761450	Less frequent than 10%
Amp	chr19:31000002-59128983	EMP3	chr19:48828628-48833810	Less frequent than 10%
Amp	chr19:31000002-59128983	KCNJ14	chr19:48958963-48969367	Less frequent than 10%
Amp	chr19:31000002-59128983	CYTH2	chr19:48972464-48985571	Less frequent than 10%
Amp	chr19:31000002-59128983	FAM83E	chr19:49103856-49116694	Less frequent than 10%
Amp	chr19:31000002-59128983	SPACA4	chr19:49109999-49110971	Less frequent than 10%
Amp	chr19:31000002-59128983	SPHK2	chr19:49122547-49133663	Less frequent than 10%
Amp	chr19:31000002-59128983	CA11	chr19:49141271-49149451	Less frequent than 10%
Amp	chr19:31000002-59128983	IZUMO1	chr19:49244144-49250166	Less frequent than 10%
Amp	chr19:31000002-59128983	FGF21	chr19:49259343-49261582	Less frequent than 10%
Amp	chr19:31000002-59128983	FUT1	chr19:49251267-49258647	Less frequent than 10%
Amp	chr19:31000002-59128983	PPP1R15A	chr19:49375648-49379319	Less frequent than 10%
Amp	chr19:31000002-59128983	FTL	chr19:49468565-49470136	Less frequent than 10%
Amp	chr19:31000002-59128983	CGB	chr19:49526125-49527632	Less frequent than 10%
Amp	chr19:31000002-59128983	LHB	chr19:49519236-49520347	Less frequent than 10%
Amp	chr19:31000002-59128983	LOC101059948	chr19:49521504-49522741	Less frequent than 10%
Amp	chr19:31000002-59128983	CGB1	chr19:49538825-49540191	Less frequent than 10%
Amp	chr19:31000002-59128983	CGB2	chr19:49535129-49536495	Less frequent than 10%
Amp	chr19:31000002-59128983	SNAR-G1	chr19:49540276-49540404	Less frequent than 10%
Amp	chr19:31000002-59128983	SNAR-G2	chr19:49534925-49535044	Less frequent than 10%
Amp	chr19:31000002-59128983	CGB5	chr19:49547101-49548568	Less frequent than 10%
Amp	chr19:31000002-59128983	CGB7	chr19:49557530-49558997	Less frequent than 10%
Amp	chr19:31000002-59128983	CGB8	chr19:49550894-49552368	Less frequent than 10%
Amp	chr19:31000002-59128983	KCNA7	chr19:49570674-49576198	Less frequent than 10%
Amp	chr19:31000002-59128983	NTF4	chr19:49564396-49567124	Less frequent than 10%
Amp	chr19:31000002-59128983	C19orf73	chr19:49621653-49622397	Less frequent than 10%
Amp	chr19:31000002-59128983	LIN7B	chr19:49617617-49621717	Less frequent than 10%
Amp	chr19:31000002-59128983	HRC	chr19:49654455-49658681	Less frequent than 10%
Amp	chr19:31000002-59128983	MIR4324	chr19:49812053-49812125	Less frequent than 10%
Amp	chr19:31000002-59128983	LOC100507003	chr19:49929687-49932075	Less frequent than 10%
Amp	chr19:31000002-59128983	PTH2	chr19:49925670-49926698	Less frequent than 10%
Amp	chr19:31000002-59128983	RPL13A	chr19:49990810-49995564	Less frequent than 10%
Amp	chr19:31000002-59128983	RPL13AP5	chr19:49990864-49995096	Less frequent than 10%
Amp	chr19:31000002-59128983	RPS11	chr19:49999621-50002969	Less frequent than 10%
Amp	chr19:31000002-59128983	SNORD32A	chr19:49993222-49993304	Less frequent than 10%
Amp	chr19:31000002-59128983	SNORD33	chr19:49993873-49993956	Less frequent than 10%
Amp	chr19:31000002-59128983	SNORD34	chr19:49994163-49994229	Less frequent than 10%
Amp	chr19:31000002-59128983	SNORD35A	chr19:49994431-49994517	Less frequent than 10%
Amp	chr19:31000002-59128983	SNORD35B	chr19:50000975-50001062	Less frequent than 10%
Amp	chr19:31000002-59128983	MIR150	chr19:50004041-50004125	Less frequent than 10%
Amp	chr19:31000002-59128983	RRAS	chr19:50138551-50143400	Less frequent than 10%
Amp	chr19:31000002-59128983	BCL2L12	chr19:50168398-50177173	Less frequent than 10%
Amp	chr19:31000002-59128983	ADM5	chr19:50191941-50194247	Less frequent than 10%
Amp	chr19:31000002-59128983	MIR5088	chr19:50185327-50185411	Less frequent than 10%
Amp	chr19:31000002-59128983	MIR4749	chr19:50357847-50357908	Less frequent than 10%
Amp	chr19:31000002-59128983	PTOV1	chr19:50354415-50363999	Less frequent than 10%
Amp	chr19:31000002-59128983	PNKP	chr19:50364459-50370822	Less frequent than 10%
Amp	chr19:31000002-59128983	MIR4750	chr19:50391431-50391487	Less frequent than 10%
Amp	chr19:31000002-59128983	ATF5	chr19:50431958-50437193	Less frequent than 10%
Amp	chr19:31000002-59128983	MIR4751	chr19:50436320-50436394	Less frequent than 10%
Amp	chr19:31000002-59128983	SIGLEC16	chr19:50472911-50479076	Less frequent than 10%
Amp	chr19:31000002-59128983	SNAR-B1	chr19:50637001-50642494	Less frequent than 10%
Amp	chr19:31000002-59128983	SNAR-B2	chr19:50637001-50642494	Less frequent than 10%
Amp	chr19:31000002-59128983	SNAR-D	chr19:50643458-50643577	Less frequent than 10%
Amp	chr19:31000002-59128983	NAPSA	chr19:50861733-50868931	Less frequent than 10%
Amp	chr19:31000002-59128983	NR1H2	chr19:50879679-50886285	Less frequent than 10%
Amp	chr19:31000002-59128983	SPIB	chr19:50922194-50934309	Less frequent than 10%
Amp	chr19:31000002-59128983	EMC10	chr19:50979735-50986608	Less frequent than 10%
Amp	chr19:31000002-59128983	ASPDH	chr19:51014856-51017947	Less frequent than 10%
Amp	chr19:31000002-59128983	JOSD2	chr19:51009253-51014612	Less frequent than 10%
Amp	chr19:31000002-59128983	SNAR-F	chr19:51108219-51108342	Less frequent than 10%
Amp	chr19:31000002-59128983	C19orf81	chr19:51152701-51162567	Less frequent than 10%
Amp	chr19:31000002-59128983	CLEC11A	chr19:51226604-51228981	Less frequent than 10%
Amp	chr19:31000002-59128983	GPR32	chr19:51273720-51274989	Less frequent than 10%
Amp	chr19:31000002-59128983	C19orf48	chr19:51300960-51307974	Less frequent than 10%
Amp	chr19:31000002-59128983	SNORD88A	chr19:51302695-51302792	Less frequent than 10%
Amp	chr19:31000002-59128983	SNORD88B	chr19:51302285-51302382	Less frequent than 10%
Amp	chr19:31000002-59128983	SNORD88C	chr19:51305581-51305678	Less frequent than 10%
Amp	chr19:31000002-59128983	KLK1	chr19:51322401-51327043	Less frequent than 10%
Amp	chr19:31000002-59128983	MGC45922	chr19:51320936-51322134	Less frequent than 10%
Amp	chr19:31000002-59128983	KLK5	chr19:51446558-51456344	Less frequent than 10%
Amp	chr19:31000002-59128983	KLK7	chr19:51479734-51487320	Less frequent than 10%
Amp	chr19:31000002-59128983	KLK8	chr19:51499263-51504958	Less frequent than 10%
Amp	chr19:31000002-59128983	KLK10	chr19:51515999-51523431	Less frequent than 10%
Amp	chr19:31000002-59128983	KLK12	chr19:51532347-51538148	Less frequent than 10%
Amp	chr19:31000002-59128983	KLK14	chr19:51581153-51587502	Less frequent than 10%
Amp	chr19:31000002-59128983	SIGLEC9	chr19:51628136-51639520	Less frequent than 10%
Amp	chr19:31000002-59128983	SIGLEC7	chr19:51645557-51656783	Less frequent than 10%
Amp	chr19:31000002-59128983	NKG7	chr19:51874873-51875960	Less frequent than 10%
Amp	chr19:31000002-59128983	LOC147646	chr19:51891542-51893828	Less frequent than 10%
Amp	chr19:31000002-59128983	LOC100129083	chr19:51919159-51920679	Less frequent than 10%
Amp	chr19:31000002-59128983	SIGLEC8	chr19:51954250-51961708	Less frequent than 10%
Amp	chr19:31000002-59128983	SIGLEC6	chr19:52022783-52035110	Less frequent than 10%
Amp	chr19:31000002-59128983	FLJ30403	chr19:52095035-52097633	Less frequent than 10%
Amp	chr19:31000002-59128983	SIGLEC14	chr19:52145805-52150132	Less frequent than 10%
Amp	chr19:31000002-59128983	MIR125A	chr19:52196506-52196592	Less frequent than 10%
Amp	chr19:31000002-59128983	MIR99B	chr19:52195864-52195934	Less frequent than 10%
Amp	chr19:31000002-59128983	MIRLET7E	chr19:52196038-52196117	Less frequent than 10%
Amp	chr19:31000002-59128983	HAS1	chr19:52216364-52227221	Less frequent than 10%
Amp	chr19:31000002-59128983	FPR1	chr19:52249022-52255150	Less frequent than 10%
Amp	chr19:31000002-59128983	MIR643	chr19:52785049-52785143	Less frequent than 10%
Amp	chr19:31000002-59128983	ZNF320	chr19:53379424-53394599	Less frequent than 10%
Amp	chr19:31000002-59128983	ERVV-1	chr19:53517343-53519833	Less frequent than 10%
Amp	chr19:31000002-59128983	ERVV-2	chr19:53547990-53554380	Less frequent than 10%
Amp	chr19:31000002-59128983	ZNF818P	chr19:53716200-53719355	Less frequent than 10%
Amp	chr19:31000002-59128983	VN1R2	chr19:53761544-53762855	Less frequent than 10%
Amp	chr19:31000002-59128983	VN1R4	chr19:53770012-53770918	Less frequent than 10%
Amp	chr19:31000002-59128983	FAM90A27P	chr19:53785542-53787602	Less frequent than 10%
Amp	chr19:31000002-59128983	BIRC8	chr19:53792853-53794875	Less frequent than 10%
Amp	chr19:31000002-59128983	LOC284379	chr19:54102884-54106751	Less frequent than 10%
Amp	chr19:31000002-59128983	DPRX	chr19:54135309-54140263	Less frequent than 10%
Amp	chr19:31000002-59128983	MIR1323	chr19:54175221-54175294	Less frequent than 10%
Amp	chr19:31000002-59128983	MIR498	chr19:54177450-54177574	Less frequent than 10%
Amp	chr19:31000002-59128983	MIR512-1	chr19:54169932-54172500	Less frequent than 10%
Amp	chr19:31000002-59128983	MIR512-2	chr19:54169926-54172508	Less frequent than 10%
Amp	chr19:31000002-59128983	MIR520E	chr19:54178964-54179051	Less frequent than 10%
Amp	chr19:31000002-59128983	MIR1283-1	chr19:54191734-54191821	Less frequent than 10%
Amp	chr19:31000002-59128983	MIR515-1	chr19:54182256-54188345	Less frequent than 10%
Amp	chr19:31000002-59128983	MIR515-2	chr19:54182256-54188345	Less frequent than 10%
Amp	chr19:31000002-59128983	MIR519C	chr19:54189722-54189809	Less frequent than 10%
Amp	chr19:31000002-59128983	MIR519E	chr19:54183193-54183277	Less frequent than 10%
Amp	chr19:31000002-59128983	MIR520A	chr19:54194134-54194219	Less frequent than 10%
Amp	chr19:31000002-59128983	MIR520F	chr19:54185412-54185499	Less frequent than 10%
Amp	chr19:31000002-59128983	MIR526B	chr19:54197646-54197729	Less frequent than 10%
Amp	chr19:31000002-59128983	MIR518B	chr19:54205990-54206073	Less frequent than 10%
Amp	chr19:31000002-59128983	MIR518C	chr19:54211988-54212089	Less frequent than 10%
Amp	chr19:31000002-59128983	MIR518F	chr19:54203268-54203355	Less frequent than 10%
Amp	chr19:31000002-59128983	MIR519B	chr19:54198466-54198547	Less frequent than 10%
Amp	chr19:31000002-59128983	MIR520B	chr19:54204480-54204541	Less frequent than 10%
Amp	chr19:31000002-59128983	MIR520C	chr19:54210706-54210793	Less frequent than 10%
Amp	chr19:31000002-59128983	MIR523	chr19:54201638-54201725	Less frequent than 10%
Amp	chr19:31000002-59128983	MIR524	chr19:54214255-54214342	Less frequent than 10%
Amp	chr19:31000002-59128983	MIR525	chr19:54200786-54200871	Less frequent than 10%
Amp	chr19:31000002-59128983	MIR526A1	chr19:54209505-54209590	Less frequent than 10%
Amp	chr19:31000002-59128983	MIR516B2	chr19:54228695-54228780	Less frequent than 10%
Amp	chr19:31000002-59128983	MIR517A	chr19:54215521-54215608	Less frequent than 10%
Amp	chr19:31000002-59128983	MIR517B	chr19:54224329-54224396	Less frequent than 10%
Amp	chr19:31000002-59128983	MIR519D	chr19:54216600-54216688	Less frequent than 10%
Amp	chr19:31000002-59128983	MIR520D	chr19:54223349-54223436	Less frequent than 10%
Amp	chr19:31000002-59128983	MIR520G	chr19:54225419-54225509	Less frequent than 10%
Amp	chr19:31000002-59128983	MIR521-2	chr19:54219847-54219934	Less frequent than 10%
Amp	chr19:31000002-59128983	MIR526A2	chr19:54230175-54230240	Less frequent than 10%
Amp	chr19:31000002-59128983	MIR516B1	chr19:54240098-54240188	Less frequent than 10%
Amp	chr19:31000002-59128983	MIR517C	chr19:54244566-54244661	Less frequent than 10%
Amp	chr19:31000002-59128983	MIR518A1	chr19:54234259-54234344	Less frequent than 10%
Amp	chr19:31000002-59128983	MIR518A2	chr19:54242586-54242673	Less frequent than 10%
Amp	chr19:31000002-59128983	MIR518D	chr19:54238130-54238217	Less frequent than 10%
Amp	chr19:31000002-59128983	MIR518E	chr19:54233091-54233179	Less frequent than 10%
Amp	chr19:31000002-59128983	MIR520H	chr19:54245765-54245853	Less frequent than 10%
Amp	chr19:31000002-59128983	MIR1283-2	chr19:54261485-54261572	Less frequent than 10%
Amp	chr19:31000002-59128983	MIR516A1	chr19:54259994-54260084	Less frequent than 10%
Amp	chr19:31000002-59128983	MIR519A1	chr19:54255650-54255735	Less frequent than 10%
Amp	chr19:31000002-59128983	MIR521-1	chr19:54251889-54251976	Less frequent than 10%
Amp	chr19:31000002-59128983	MIR522	chr19:54254464-54254551	Less frequent than 10%
Amp	chr19:31000002-59128983	MIR527	chr19:54257271-54257356	Less frequent than 10%
Amp	chr19:31000002-59128983	MIR516A2	chr19:54264386-54264476	Less frequent than 10%
Amp	chr19:31000002-59128983	MIR519A2	chr19:54265597-54265684	Less frequent than 10%
Amp	chr19:31000002-59128983	MIR371A	chr19:54290928-54290995	Less frequent than 10%
Amp	chr19:31000002-59128983	MIR371B	chr19:54290930-54290996	Less frequent than 10%
Amp	chr19:31000002-59128983	MIR372	chr19:54291143-54291210	Less frequent than 10%
Amp	chr19:31000002-59128983	MIR373	chr19:54291958-54292027	Less frequent than 10%
Amp	chr19:31000002-59128983	MIR935	chr19:54485560-54485651	Less frequent than 10%
Amp	chr19:31000002-59128983	OSCAR	chr19:54597932-54605994	Less frequent than 10%
Amp	chr19:31000002-59128983	TFPT	chr19:54610319-54619055	Less frequent than 10%
Amp	chr19:31000002-59128983	LENG1	chr19:54659378-54663446	Less frequent than 10%
Amp	chr19:31000002-59128983	TSEN34	chr19:54694118-54698394	Less frequent than 10%
Amp	chr19:31000002-59128983	LILRA6	chr19:54740467-54746617	Less frequent than 10%
Amp	chr19:31000002-59128983	LILRB2	chr19:54777674-54785033	Less frequent than 10%
Amp	chr19:31000002-59128983	MIR4752	chr19:54785963-54786035	Less frequent than 10%
Amp	chr19:31000002-59128983	LILRA3	chr19:54799854-54804265	Less frequent than 10%
Amp	chr19:31000002-59128983	LILRA4	chr19:54844691-54850421	Less frequent than 10%
Amp	chr19:31000002-59128983	CDC42EP5	chr19:54976208-54984437	Less frequent than 10%
Amp	chr19:31000002-59128983	LENG9	chr19:54972978-54974894	Less frequent than 10%
Amp	chr19:31000002-59128983	LILRA2	chr19:55085256-55099027	Less frequent than 10%
Amp	chr19:31000002-59128983	LILRA1	chr19:55105040-55113846	Less frequent than 10%
Amp	chr19:31000002-59128983	LILRP2	chr19:55219699-55224955	Less frequent than 10%
Amp	chr19:31000002-59128983	KIR2DL1	chr19:55281264-55295778	Less frequent than 10%
Amp	chr19:31000002-59128983	NCR1	chr19:55417507-55424439	Less frequent than 10%
Amp	chr19:31000002-59128983	RNU6-35P	chr19:55471012-55471042	Less frequent than 10%
Amp	chr19:31000002-59128983	RNU6-64P	chr19:55471012-55471043	Less frequent than 10%
Amp	chr19:31000002-59128983	TNNI3	chr19:55663135-55669100	Less frequent than 10%
Amp	chr19:31000002-59128983	COX6B2	chr19:55861069-55866182	Less frequent than 10%
Amp	chr19:31000002-59128983	IL11	chr19:55875749-55881831	Less frequent than 10%
Amp	chr19:31000002-59128983	TMEM190	chr19:55888203-55889612	Less frequent than 10%
Amp	chr19:31000002-59128983	TMEM238	chr19:55890611-55895627	Less frequent than 10%
Amp	chr19:31000002-59128983	NAT14	chr19:55996556-55998935	Less frequent than 10%
Amp	chr19:31000002-59128983	ZNF628	chr19:55987698-55995854	Less frequent than 10%
Amp	chr19:31000002-59128983	SBK2	chr19:56041099-56048435	Less frequent than 10%
Amp	chr19:31000002-59128983	SBK3	chr19:56052022-56056909	Less frequent than 10%
Amp	chr19:31000002-59128983	ZNF579	chr19:56088890-56092211	Less frequent than 10%
Amp	chr19:31000002-59128983	FIZ1	chr19:56102736-56110893	Less frequent than 10%
Amp	chr19:31000002-59128983	ZNF524	chr19:56111729-56114504	Less frequent than 10%
Amp	chr19:31000002-59128983	ZNF865	chr19:56124958-56129907	Less frequent than 10%
Amp	chr19:31000002-59128983	ZNF784	chr19:56132106-56135941	Less frequent than 10%
Amp	chr19:31000002-59128983	ZNF580	chr19:56152391-56154836	Less frequent than 10%
Amp	chr19:31000002-59128983	ZNF581	chr19:56154985-56156989	Less frequent than 10%
Amp	chr19:31000002-59128983	RFPL4A	chr19:56270506-56274541	Less frequent than 10%
Amp	chr19:31000002-59128983	RFPL4AL1	chr19:56283170-56284545	Less frequent than 10%
Amp	chr19:31000002-59128983	ZSCAN5B	chr19:56701057-56704421	Less frequent than 10%
Amp	chr19:31000002-59128983	ZNF582-AS1	chr19:56905044-56910544	Less frequent than 10%
Amp	chr19:31000002-59128983	PEG3-AS1	chr19:57323847-57325161	Less frequent than 10%
Amp	chr19:31000002-59128983	MIMT1	chr19:57352269-57359922	Less frequent than 10%
Amp	chr19:31000002-59128983	AURKC	chr19:57742376-57746916	Less frequent than 10%
Amp	chr19:31000002-59128983	TRAPPC2P1	chr19:57874878-57876721	Less frequent than 10%
Amp	chr19:31000002-59128983	ZNF548	chr19:57901217-57913919	Less frequent than 10%
Amp	chr19:31000002-59128983	ZNF17	chr19:57922528-57933307	Less frequent than 10%
Amp	chr19:31000002-59128983	ZNF416	chr19:58082933-58090243	Less frequent than 10%
Amp	chr19:31000002-59128983	ZSCAN4	chr19:58180302-58190520	Less frequent than 10%
Amp	chr19:31000002-59128983	ZNF671	chr19:58231118-58238995	Less frequent than 10%
Amp	chr19:31000002-59128983	ZNF586	chr19:58281019-58291984	Less frequent than 10%
Amp	chr19:31000002-59128983	ZNF552	chr19:58318449-58326281	Less frequent than 10%
Amp	chr19:31000002-59128983	FKBP1AP1	chr19:58336666-58338830	Less frequent than 10%
Amp	chr19:31000002-59128983	LOC100128398	chr19:58514261-58518574	Less frequent than 10%
Amp	chr19:31000002-59128983	A1BG	chr19:58858171-58864865	Less frequent than 10%
Amp	chr19:31000002-59128983	A1BG-AS1	chr19:58863335-58866549	Less frequent than 10%
Amp	chr19:31000002-59128983	MIR4754	chr19:58898136-58898225	Less frequent than 10%
Amp	chr19:31000002-59128983	LOC646862	chr19:58907456-58908446	Less frequent than 10%
Amp	chr19:31000002-59128983	ZNF584	chr19:58920062-58929692	Less frequent than 10%
Amp	chr19:31000002-59128983	ZNF446	chr19:58987794-58992597	Less frequent than 10%
Amp	chr19:31000002-59128983	ZBTB45	chr19:59024896-59030921	Less frequent than 10%
Amp	chr19:31000002-59128983	TRIM28	chr19:59055835-59062082	Less frequent than 10%
Amp	chr19:31000002-59128983	UBE2M	chr19:59067078-59070343	Less frequent than 10%
Amp	chr19:31000002-59128983	CENPBD1P1	chr19:59086765-59095762	Less frequent than 10%
Amp	chr19:31000002-59128983	TSHZ3	chr19:31765850-31840190	Less frequent than 10%
Amp	chr19:31000002-59128983	THEG5	chr19:32079094-32084456	Less frequent than 10%
Amp	chr19:31000002-59128983	LOC400684	chr19:32880955-32896445	Less frequent than 10%
Amp	chr19:31000002-59128983	ZNF507	chr19:32836513-32878573	Less frequent than 10%
Amp	chr19:31000002-59128983	NUDT19	chr19:33182866-33204702	Less frequent than 10%
Amp	chr19:31000002-59128983	TDRD12	chr19:33210678-33281714	Less frequent than 10%
Amp	chr19:31000002-59128983	SLC7A9	chr19:33321418-33360683	Less frequent than 10%
Amp	chr19:31000002-59128983	GPATCH1	chr19:33571785-33621318	Less frequent than 10%
Amp	chr19:31000002-59128983	WDR88	chr19:33622997-33666703	Less frequent than 10%
Amp	chr19:31000002-59128983	SLC7A10	chr19:33699569-33716756	Less frequent than 10%
Amp	chr19:31000002-59128983	CEBPG	chr19:33864574-33873592	Less frequent than 10%
Amp	chr19:31000002-59128983	KCTD15	chr19:34287750-34306666	Less frequent than 10%
Amp	chr19:31000002-59128983	LSM14A	chr19:34663351-34720420	Less frequent than 10%
Amp	chr19:31000002-59128983	KIAA0355	chr19:34745455-34846471	Less frequent than 10%
Amp	chr19:31000002-59128983	PDCD2L	chr19:34895302-34917072	Less frequent than 10%
Amp	chr19:31000002-59128983	UBA2	chr19:34919267-34960798	Less frequent than 10%
Amp	chr19:31000002-59128983	WTIP	chr19:34972879-34992085	Less frequent than 10%
Amp	chr19:31000002-59128983	ZNF181	chr19:35225479-35233774	Less frequent than 10%
Amp	chr19:31000002-59128983	ZNF302	chr19:35168566-35177302	Less frequent than 10%
Amp	chr19:31000002-59128983	LOC400685	chr19:35307057-35323773	Less frequent than 10%
Amp	chr19:31000002-59128983	GRAMD1A	chr19:35491245-35517373	Less frequent than 10%
Amp	chr19:31000002-59128983	ZNF30	chr19:35417806-35436076	Less frequent than 10%
Amp	chr19:31000002-59128983	FXYD7	chr19:35634153-35645205	Less frequent than 10%
Amp	chr19:31000002-59128983	HPN	chr19:35531409-35557477	Less frequent than 10%
Amp	chr19:31000002-59128983	HPN-AS1	chr19:35549962-35597208	Less frequent than 10%
Amp	chr19:31000002-59128983	LGI4	chr19:35615416-35626178	Less frequent than 10%
Amp	chr19:31000002-59128983	FAM187B	chr19:35715703-35719628	Less frequent than 10%
Amp	chr19:31000002-59128983	LSR	chr19:35739558-35758867	Less frequent than 10%
Amp	chr19:31000002-59128983	USF2	chr19:35759895-35770718	Less frequent than 10%
Amp	chr19:31000002-59128983	CD22	chr19:35820068-35838264	Less frequent than 10%
Amp	chr19:31000002-59128983	LOC100128682	chr19:35896508-35907742	Less frequent than 10%
Amp	chr19:31000002-59128983	MAG	chr19:35782988-35804709	Less frequent than 10%
Amp	chr19:31000002-59128983	DMKN	chr19:35988118-36004560	Less frequent than 10%
Amp	chr19:31000002-59128983	GAPDHS	chr19:36024313-36036221	Less frequent than 10%
Amp	chr19:31000002-59128983	KRTDAP	chr19:35978225-35981433	Less frequent than 10%
Amp	chr19:31000002-59128983	COX6B1	chr19:36139124-36149686	Less frequent than 10%
Amp	chr19:31000002-59128983	HAUS5	chr19:36103645-36116251	Less frequent than 10%
Amp	chr19:31000002-59128983	RBM42	chr19:36119979-36128587	Less frequent than 10%
Amp	chr19:31000002-59128983	UPK1A	chr19:36157417-36169387	Less frequent than 10%
Amp	chr19:31000002-59128983	UPK1A-AS1	chr19:36158849-36164193	Less frequent than 10%
Amp	chr19:31000002-59128983	ARHGAP33	chr19:36266416-36279724	Less frequent than 10%
Amp	chr19:31000002-59128983	C19orf55	chr19:36249043-36260077	Less frequent than 10%
Amp	chr19:31000002-59128983	KMT2B	chr19:36208920-36229779	Less frequent than 10%
Amp	chr19:31000002-59128983	LIN37	chr19:36239261-36245420	Less frequent than 10%
Amp	chr19:31000002-59128983	KIRREL2	chr19:36347809-36358048	Less frequent than 10%
Amp	chr19:31000002-59128983	NFKBID	chr19:36379142-36391552	Less frequent than 10%
Amp	chr19:31000002-59128983	NPHS1	chr19:36316273-36342895	Less frequent than 10%
Amp	chr19:31000002-59128983	ALKBH6	chr19:36500021-36505141	Less frequent than 10%
Amp	chr19:31000002-59128983	CLIP3	chr19:36505561-36523797	Less frequent than 10%
Amp	chr19:31000002-59128983	SDHAF1	chr19:36486089-36487220	Less frequent than 10%
Amp	chr19:31000002-59128983	THAP8	chr19:36525886-36545664	Less frequent than 10%
Amp	chr19:31000002-59128983	CAPNS1	chr19:36630917-36641255	Less frequent than 10%
Amp	chr19:31000002-59128983	LINC00665	chr19:36803962-36822620	Less frequent than 10%
Amp	chr19:31000002-59128983	ZNF146	chr19:36705503-36729675	Less frequent than 10%
Amp	chr19:31000002-59128983	LOC644189	chr19:36912075-36913799	Less frequent than 10%
Amp	chr19:31000002-59128983	ZFP82	chr19:36882860-36909550	Less frequent than 10%
Amp	chr19:31000002-59128983	ZNF260	chr19:37001588-37019248	Less frequent than 10%
Amp	chr19:31000002-59128983	ZNF382	chr19:37096206-37119499	Less frequent than 10%
Amp	chr19:31000002-59128983	ZNF461	chr19:37128282-37157739	Less frequent than 10%
Amp	chr19:31000002-59128983	ZNF567	chr19:37180301-37212225	Less frequent than 10%
Amp	chr19:31000002-59128983	ZNF790	chr19:37309223-37341689	Less frequent than 10%
Amp	chr19:31000002-59128983	ZNF790-AS1	chr19:37288451-37319013	Less frequent than 10%
Amp	chr19:31000002-59128983	ZNF850	chr19:37234379-37263716	Less frequent than 10%
Amp	chr19:31000002-59128983	ZNF829	chr19:37379025-37407193	Less frequent than 10%
Amp	chr19:31000002-59128983	ZNF383	chr19:37717365-37734574	Less frequent than 10%
Amp	chr19:31000002-59128983	ZNF585A	chr19:37641000-37663615	Less frequent than 10%
Amp	chr19:31000002-59128983	ZNF585B	chr19:37672480-37701451	Less frequent than 10%
Amp	chr19:31000002-59128983	HKR1	chr19:37825579-37855357	Less frequent than 10%
Amp	chr19:31000002-59128983	ZNF569	chr19:37902059-37958339	Less frequent than 10%
Amp	chr19:31000002-59128983	ZNF570	chr19:37959981-37976242	Less frequent than 10%
Amp	chr19:31000002-59128983	ZNF540	chr19:38042272-38105079	Less frequent than 10%
Amp	chr19:31000002-59128983	ZNF571	chr19:38055154-38085673	Less frequent than 10%
Amp	chr19:31000002-59128983	ZNF571-AS1	chr19:38039850-38078248	Less frequent than 10%
Amp	chr19:31000002-59128983	ZNF573	chr19:38229202-38270230	Less frequent than 10%
Amp	chr19:31000002-59128983	ZNF607	chr19:38187263-38210691	Less frequent than 10%
Amp	chr19:31000002-59128983	ZNF781	chr19:38158649-38183216	Less frequent than 10%
Amp	chr19:31000002-59128983	LOC100631378	chr19:38314362-38345836	Less frequent than 10%
Amp	chr19:31000002-59128983	WDR87	chr19:38375471-38397317	Less frequent than 10%
Amp	chr19:31000002-59128983	DPF1	chr19:38701648-38720317	Less frequent than 10%
Amp	chr19:31000002-59128983	SPINT2	chr19:38755097-38783254	Less frequent than 10%
Amp	chr19:31000002-59128983	CATSPERG	chr19:38826442-38861589	Less frequent than 10%
Amp	chr19:31000002-59128983	FAM98C	chr19:38893774-38899728	Less frequent than 10%
Amp	chr19:31000002-59128983	KCNK6	chr19:38810483-38819649	Less frequent than 10%
Amp	chr19:31000002-59128983	RASGRP4	chr19:38899697-38916945	Less frequent than 10%
Amp	chr19:31000002-59128983	EIF3K	chr19:39109721-39127595	Less frequent than 10%
Amp	chr19:31000002-59128983	MAP4K1	chr19:39078280-39108643	Less frequent than 10%
Amp	chr19:31000002-59128983	CAPN12	chr19:39220831-39235114	Less frequent than 10%
Amp	chr19:31000002-59128983	HNRNPL	chr19:39327027-39342979	Less frequent than 10%
Amp	chr19:31000002-59128983	SARS2	chr19:39405903-39421536	Less frequent than 10%
Amp	chr19:31000002-59128983	SIRT2	chr19:39369194-39390502	Less frequent than 10%
Amp	chr19:31000002-59128983	FBXO27	chr19:39514662-39523198	Less frequent than 10%
Amp	chr19:31000002-59128983	PAK4	chr19:39616419-39670046	Less frequent than 10%
Amp	chr19:31000002-59128983	PAF1	chr19:39876269-39881835	Less frequent than 10%
Amp	chr19:31000002-59128983	PLEKHG2	chr19:39903749-39919055	Less frequent than 10%
Amp	chr19:31000002-59128983	SUPT5H	chr19:39936185-39967308	Less frequent than 10%
Amp	chr19:31000002-59128983	DLL3	chr19:39989556-39999121	Less frequent than 10%
Amp	chr19:31000002-59128983	SELV	chr19:40005752-40011326	Less frequent than 10%
Amp	chr19:31000002-59128983	CLC	chr19:40221892-40228669	Less frequent than 10%
Amp	chr19:31000002-59128983	LGALS17A	chr19:40170013-40177013	Less frequent than 10%
Amp	chr19:31000002-59128983	DYRK1B	chr19:40315989-40324841	Less frequent than 10%
Amp	chr19:31000002-59128983	LEUTX	chr19:40267233-40276775	Less frequent than 10%
Amp	chr19:31000002-59128983	PSMC4	chr19:40476911-40487671	Less frequent than 10%
Amp	chr19:31000002-59128983	ZNF546	chr19:40502942-40523514	Less frequent than 10%
Amp	chr19:31000002-59128983	ZNF780A	chr19:40575058-40596845	Less frequent than 10%
Amp	chr19:31000002-59128983	ZNF780B	chr19:40534166-40562115	Less frequent than 10%
Amp	chr19:31000002-59128983	CNTD2	chr19:40728114-40732597	Less frequent than 10%
Amp	chr19:31000002-59128983	MAP3K10	chr19:40697650-40721482	Less frequent than 10%
Amp	chr19:31000002-59128983	C19orf47	chr19:40826966-40854434	Less frequent than 10%
Amp	chr19:31000002-59128983	PLD3	chr19:40854331-40884390	Less frequent than 10%
Amp	chr19:31000002-59128983	BLVRB	chr19:40953690-40971725	Less frequent than 10%
Amp	chr19:31000002-59128983	PRX	chr19:40899670-40919271	Less frequent than 10%
Amp	chr19:31000002-59128983	LTBP4	chr19:41099071-41135725	Less frequent than 10%
Amp	chr19:31000002-59128983	SHKBP1	chr19:41082756-41097305	Less frequent than 10%
Amp	chr19:31000002-59128983	ADCK4	chr19:41197433-41222790	Less frequent than 10%
Amp	chr19:31000002-59128983	C19orf54	chr19:41246760-41255828	Less frequent than 10%
Amp	chr19:31000002-59128983	ITPKC	chr19:41223007-41246765	Less frequent than 10%
Amp	chr19:31000002-59128983	NUMBL	chr19:41171811-41196556	Less frequent than 10%
Amp	chr19:31000002-59128983	SNRPA	chr19:41256758-41271297	Less frequent than 10%
Amp	chr19:31000002-59128983	CYP2A6	chr19:41349442-41356352	Less frequent than 10%
Amp	chr19:31000002-59128983	CYP2A7	chr19:41381343-41388657	Less frequent than 10%
Amp	chr19:31000002-59128983	CYP2G1P	chr19:41396730-41406413	Less frequent than 10%
Amp	chr19:31000002-59128983	CYP2B6	chr19:41497203-41524301	Less frequent than 10%
Amp	chr19:31000002-59128983	CYP2B7P1	chr19:41430169-41456565	Less frequent than 10%
Amp	chr19:31000002-59128983	CYP2A13	chr19:41594355-41602100	Less frequent than 10%
Amp	chr19:31000002-59128983	CYP2F1	chr19:41620352-41634281	Less frequent than 10%
Amp	chr19:31000002-59128983	AXL	chr19:41725103-41767672	Less frequent than 10%
Amp	chr19:31000002-59128983	B9D2	chr19:41860321-41870078	Less frequent than 10%
Amp	chr19:31000002-59128983	BCKDHA	chr19:41903693-41930910	Less frequent than 10%
Amp	chr19:31000002-59128983	CCDC97	chr19:41816093-41830788	Less frequent than 10%
Amp	chr19:31000002-59128983	EXOSC5	chr19:41892275-41903256	Less frequent than 10%
Amp	chr19:31000002-59128983	TGFB1	chr19:41836435-41859838	Less frequent than 10%
Amp	chr19:31000002-59128983	TMEM91	chr19:41869870-41889987	Less frequent than 10%
Amp	chr19:31000002-59128983	LOC100505495	chr19:41960073-42006554	Less frequent than 10%
Amp	chr19:31000002-59128983	CEACAM21	chr19:42082530-42093197	Less frequent than 10%
Amp	chr19:31000002-59128983	CEACAM7	chr19:42177234-42192096	Less frequent than 10%
Amp	chr19:31000002-59128983	CEACAM3	chr19:42300521-42315591	Less frequent than 10%
Amp	chr19:31000002-59128983	CEACAM5	chr19:42212529-42234437	Less frequent than 10%
Amp	chr19:31000002-59128983	CEACAM6	chr19:42259397-42276113	Less frequent than 10%
Amp	chr19:31000002-59128983	ARHGEF1	chr19:42387266-42411604	Less frequent than 10%
Amp	chr19:31000002-59128983	CD79A	chr19:42381189-42385439	Less frequent than 10%
Amp	chr19:31000002-59128983	DMRTC2	chr19:42349085-42356397	Less frequent than 10%
Amp	chr19:31000002-59128983	RPS19	chr19:42363987-42375484	Less frequent than 10%
Amp	chr19:31000002-59128983	ATP1A3	chr19:42470733-42498428	Less frequent than 10%
Amp	chr19:31000002-59128983	GRIK5	chr19:42502467-42569957	Less frequent than 10%
Amp	chr19:31000002-59128983	ZNF574	chr19:42580289-42585720	Less frequent than 10%
Amp	chr19:31000002-59128983	DEDD2	chr19:42702744-42724304	Less frequent than 10%
Amp	chr19:31000002-59128983	CIC	chr19:42788816-42799949	Less frequent than 10%
Amp	chr19:31000002-59128983	GSK3A	chr19:42734337-42746736	Less frequent than 10%
Amp	chr19:31000002-59128983	PRR19	chr19:42806283-42814973	Less frequent than 10%
Amp	chr19:31000002-59128983	TMEM145	chr19:42817476-42829214	Less frequent than 10%
Amp	chr19:31000002-59128983	CNFN	chr19:42891170-42894444	Less frequent than 10%
Amp	chr19:31000002-59128983	CXCL17	chr19:42932694-42947136	Less frequent than 10%
Amp	chr19:31000002-59128983	LIPE	chr19:42905658-42931578	Less frequent than 10%
Amp	chr19:31000002-59128983	CEACAM1	chr19:43011457-43032661	Less frequent than 10%
Amp	chr19:31000002-59128983	CEACAM8	chr19:43084394-43099082	Less frequent than 10%
Amp	chr19:31000002-59128983	PSG3	chr19:43225793-43244668	Less frequent than 10%
Amp	chr19:31000002-59128983	PSG10P	chr19:43341148-43359870	Less frequent than 10%
Amp	chr19:31000002-59128983	PSG6	chr19:43406233-43422076	Less frequent than 10%
Amp	chr19:31000002-59128983	PSG7	chr19:43428283-43441330	Less frequent than 10%
Amp	chr19:31000002-59128983	PSG2	chr19:43568361-43586893	Less frequent than 10%
Amp	chr19:31000002-59128983	LOC284344	chr19:43715942-43752798	Less frequent than 10%
Amp	chr19:31000002-59128983	PSG5	chr19:43671894-43690688	Less frequent than 10%
Amp	chr19:31000002-59128983	PSG9	chr19:43757434-43773682	Less frequent than 10%
Amp	chr19:31000002-59128983	CD177	chr19:43857824-43867480	Less frequent than 10%
Amp	chr19:31000002-59128983	ETHE1	chr19:44010870-44031396	Less frequent than 10%
Amp	chr19:31000002-59128983	PHLDB3	chr19:43979254-44008985	Less frequent than 10%
Amp	chr19:31000002-59128983	CADM4	chr19:44126521-44143991	Less frequent than 10%
Amp	chr19:31000002-59128983	IRGQ	chr19:44088518-44100287	Less frequent than 10%
Amp	chr19:31000002-59128983	XRCC1	chr19:44047463-44079730	Less frequent than 10%
Amp	chr19:31000002-59128983	ZNF428	chr19:44111375-44124014	Less frequent than 10%
Amp	chr19:31000002-59128983	IRGC	chr19:44220213-44224169	Less frequent than 10%
Amp	chr19:31000002-59128983	SMG9	chr19:44235300-44259142	Less frequent than 10%
Amp	chr19:31000002-59128983	LOC100505715	chr19:44395955-44405955	Less frequent than 10%
Amp	chr19:31000002-59128983	ZNF283	chr19:44331472-44353050	Less frequent than 10%
Amp	chr19:31000002-59128983	ZNF404	chr19:44376514-44384288	Less frequent than 10%
Amp	chr19:31000002-59128983	ZNF155	chr19:44488321-44502477	Less frequent than 10%
Amp	chr19:31000002-59128983	ZNF221	chr19:44455396-44471752	Less frequent than 10%
Amp	chr19:31000002-59128983	ZNF222	chr19:44529493-44537262	Less frequent than 10%
Amp	chr19:31000002-59128983	ZNF230	chr19:44507076-44518072	Less frequent than 10%
Amp	chr19:31000002-59128983	LOC100379224	chr19:44609491-44617336	Less frequent than 10%
Amp	chr19:31000002-59128983	ZNF225	chr19:44617547-44637255	Less frequent than 10%
Amp	chr19:31000002-59128983	ZNF226	chr19:44669214-44681838	Less frequent than 10%
Amp	chr19:31000002-59128983	ZNF234	chr19:44645709-44664462	Less frequent than 10%
Amp	chr19:31000002-59128983	ZNF284	chr19:44576296-44591623	Less frequent than 10%
Amp	chr19:31000002-59128983	ZNF227	chr19:44716690-44741421	Less frequent than 10%
Amp	chr19:31000002-59128983	ZNF233	chr19:44764032-44779470	Less frequent than 10%
Amp	chr19:31000002-59128983	ZNF235	chr19:44790500-44809178	Less frequent than 10%
Amp	chr19:31000002-59128983	ZNF112	chr19:44830705-44860856	Less frequent than 10%
Amp	chr19:31000002-59128983	ZNF229	chr19:44930425-44952766	Less frequent than 10%
Amp	chr19:31000002-59128983	ZNF285	chr19:44889807-44905777	Less frequent than 10%
Amp	chr19:31000002-59128983	CEACAM20	chr19:45010210-45033548	Less frequent than 10%
Amp	chr19:31000002-59128983	CEACAM22P	chr19:45041044-45060150	Less frequent than 10%
Amp	chr19:31000002-59128983	ZNF180	chr19:44978644-45004574	Less frequent than 10%
Amp	chr19:31000002-59128983	CEACAM16	chr19:45202420-45213986	Less frequent than 10%
Amp	chr19:31000002-59128983	CEACAM19	chr19:45174723-45187627	Less frequent than 10%
Amp	chr19:31000002-59128983	IGSF23	chr19:45116939-45140081	Less frequent than 10%
Amp	chr19:31000002-59128983	PVR	chr19:45147097-45169428	Less frequent than 10%
Amp	chr19:31000002-59128983	BCAM	chr19:45312315-45324678	Less frequent than 10%
Amp	chr19:31000002-59128983	BCL3	chr19:45251977-45263301	Less frequent than 10%
Amp	chr19:31000002-59128983	CBLC	chr19:45281125-45303903	Less frequent than 10%
Amp	chr19:31000002-59128983	APOC1P1	chr19:45430059-45434643	Less frequent than 10%
Amp	chr19:31000002-59128983	APOC4-APOC2	chr19:45445494-45452822	Less frequent than 10%
Amp	chr19:31000002-59128983	TOMM40	chr19:45394476-45406946	Less frequent than 10%
Amp	chr19:31000002-59128983	CLASRP	chr19:45542297-45574214	Less frequent than 10%
Amp	chr19:31000002-59128983	RELB	chr19:45504706-45541456	Less frequent than 10%
Amp	chr19:31000002-59128983	EXOC3L2	chr19:45715878-45737469	Less frequent than 10%
Amp	chr19:31000002-59128983	NKPD1	chr19:45653007-45663408	Less frequent than 10%
Amp	chr19:31000002-59128983	TRAPPC6A	chr19:45666185-45681501	Less frequent than 10%
Amp	chr19:31000002-59128983	CKM	chr19:45809670-45826235	Less frequent than 10%
Amp	chr19:31000002-59128983	ERCC2	chr19:45854648-45873845	Less frequent than 10%
Amp	chr19:31000002-59128983	MARK4	chr19:45754515-45808541	Less frequent than 10%
Amp	chr19:31000002-59128983	ERCC1	chr19:45910590-45927177	Less frequent than 10%
Amp	chr19:31000002-59128983	FOSB	chr19:45971252-45978437	Less frequent than 10%
Amp	chr19:31000002-59128983	PPP1R13L	chr19:45882891-45909607	Less frequent than 10%
Amp	chr19:31000002-59128983	RTN2	chr19:45988545-46000313	Less frequent than 10%
Amp	chr19:31000002-59128983	GPR4	chr19:46093022-46105466	Less frequent than 10%
Amp	chr19:31000002-59128983	OPA3	chr19:46031024-46088122	Less frequent than 10%
Amp	chr19:31000002-59128983	VASP	chr19:46010687-46030240	Less frequent than 10%
Amp	chr19:31000002-59128983	FBXO46	chr19:46213886-46234151	Less frequent than 10%
Amp	chr19:31000002-59128983	LOC388553	chr19:46242887-46262748	Less frequent than 10%
Amp	chr19:31000002-59128983	QPCTL	chr19:46195740-46207248	Less frequent than 10%
Amp	chr19:31000002-59128983	DMPK	chr19:46272975-46285815	Less frequent than 10%
Amp	chr19:31000002-59128983	RSPH6A	chr19:46298967-46318605	Less frequent than 10%
Amp	chr19:31000002-59128983	SYMPK	chr19:46318699-46366548	Less frequent than 10%
Amp	chr19:31000002-59128983	CCDC61	chr19:46498718-46521874	Less frequent than 10%
Amp	chr19:31000002-59128983	NOVA2	chr19:46442770-46476657	Less frequent than 10%
Amp	chr19:31000002-59128983	HIF3A	chr19:46800302-46846690	Less frequent than 10%
Amp	chr19:31000002-59128983	PPP5C	chr19:46850250-46894232	Less frequent than 10%
Amp	chr19:31000002-59128983	PNMAL1	chr19:46969747-46974820	Less frequent than 10%
Amp	chr19:31000002-59128983	DACT3	chr19:47150868-47164395	Less frequent than 10%
Amp	chr19:31000002-59128983	DACT3-AS1	chr19:47163620-47180713	Less frequent than 10%
Amp	chr19:31000002-59128983	FKRP	chr19:47249302-47261832	Less frequent than 10%
Amp	chr19:31000002-59128983	SLC1A5	chr19:47278139-47291842	Less frequent than 10%
Amp	chr19:31000002-59128983	STRN4	chr19:47222767-47249720	Less frequent than 10%
Amp	chr19:31000002-59128983	AP2S1	chr19:47341422-47354203	Less frequent than 10%
Amp	chr19:31000002-59128983	NPAS1	chr19:47524142-47549017	Less frequent than 10%
Amp	chr19:31000002-59128983	BBC3	chr19:47724078-47736023	Less frequent than 10%
Amp	chr19:31000002-59128983	C5AR1	chr19:47813103-47825327	Less frequent than 10%
Amp	chr19:31000002-59128983	DHX34	chr19:47852537-47885961	Less frequent than 10%
Amp	chr19:31000002-59128983	MEIS3	chr19:47906374-47922785	Less frequent than 10%
Amp	chr19:31000002-59128983	NAPA	chr19:47990890-48018515	Less frequent than 10%
Amp	chr19:31000002-59128983	NAPA-AS1	chr19:47987538-48004854	Less frequent than 10%
Amp	chr19:31000002-59128983	ZNF541	chr19:48023941-48059113	Less frequent than 10%
Amp	chr19:31000002-59128983	GLTSCR1	chr19:48111452-48206534	Less frequent than 10%
Amp	chr19:31000002-59128983	CRX	chr19:48325098-48346586	Less frequent than 10%
Amp	chr19:31000002-59128983	GLTSCR2	chr19:48248792-48260323	Less frequent than 10%
Amp	chr19:31000002-59128983	SEPW1	chr19:48281841-48287943	Less frequent than 10%
Amp	chr19:31000002-59128983	BSPH1	chr19:48471302-48495427	Less frequent than 10%
Amp	chr19:31000002-59128983	SNAR-A1	chr19:48421685-48437559	Less frequent than 10%
Amp	chr19:31000002-59128983	SNAR-A12	chr19:48410934-48448300	Less frequent than 10%
Amp	chr19:31000002-59128983	SNAR-A13	chr19:48410934-48448300	Less frequent than 10%
Amp	chr19:31000002-59128983	SNAR-A2	chr19:48421685-48437559	Less frequent than 10%
Amp	chr19:31000002-59128983	SNAR-C1	chr19:48416307-48459058	Less frequent than 10%
Amp	chr19:31000002-59128983	SNAR-C2	chr19:48416307-48459058	Less frequent than 10%
Amp	chr19:31000002-59128983	SNAR-C5	chr19:48416307-48459058	Less frequent than 10%
Amp	chr19:31000002-59128983	SULT2A1	chr19:48373722-48389654	Less frequent than 10%
Amp	chr19:31000002-59128983	CABP5	chr19:48532639-48547311	Less frequent than 10%
Amp	chr19:31000002-59128983	ELSPBP1	chr19:48497907-48528410	Less frequent than 10%
Amp	chr19:31000002-59128983	PLA2G4C	chr19:48551099-48614109	Less frequent than 10%
Amp	chr19:31000002-59128983	C19orf68	chr19:48673948-48700877	Less frequent than 10%
Amp	chr19:31000002-59128983	CCDC114	chr19:48799708-48823332	Less frequent than 10%
Amp	chr19:31000002-59128983	SYNGR4	chr19:48867650-48879634	Less frequent than 10%
Amp	chr19:31000002-59128983	TMEM143	chr19:48835615-48867186	Less frequent than 10%
Amp	chr19:31000002-59128983	ZNF114	chr19:48774653-48790863	Less frequent than 10%
Amp	chr19:31000002-59128983	GRIN2D	chr19:48898131-48948188	Less frequent than 10%
Amp	chr19:31000002-59128983	GRWD1	chr19:48949029-48957164	Less frequent than 10%
Amp	chr19:31000002-59128983	LMTK3	chr19:48988527-49016446	Less frequent than 10%
Amp	chr19:31000002-59128983	DBP	chr19:49133816-49140639	Less frequent than 10%
Amp	chr19:31000002-59128983	RPL18	chr19:49118583-49122675	Less frequent than 10%
Amp	chr19:31000002-59128983	SULT2B1	chr19:49055428-49102684	Less frequent than 10%
Amp	chr19:31000002-59128983	FUT2	chr19:49199227-49209191	Less frequent than 10%
Amp	chr19:31000002-59128983	MAMSTR	chr19:49216254-49222976	Less frequent than 10%
Amp	chr19:31000002-59128983	NTN5	chr19:49164663-49176264	Less frequent than 10%
Amp	chr19:31000002-59128983	RASIP1	chr19:49223841-49243970	Less frequent than 10%
Amp	chr19:31000002-59128983	BCAT2	chr19:49298318-49314320	Less frequent than 10%
Amp	chr19:31000002-59128983	HSD17B14	chr19:49316273-49339934	Less frequent than 10%
Amp	chr19:31000002-59128983	PLEKHA4	chr19:49340353-49371884	Less frequent than 10%
Amp	chr19:31000002-59128983	TULP2	chr19:49384221-49401996	Less frequent than 10%
Amp	chr19:31000002-59128983	BAX	chr19:49458116-49465055	Less frequent than 10%
Amp	chr19:31000002-59128983	DHDH	chr19:49436938-49448226	Less frequent than 10%
Amp	chr19:31000002-59128983	GYS1	chr19:49471381-49496610	Less frequent than 10%
Amp	chr19:31000002-59128983	RUVBL2	chr19:49497155-49519182	Less frequent than 10%
Amp	chr19:31000002-59128983	PPFIA3	chr19:49622645-49654287	Less frequent than 10%
Amp	chr19:31000002-59128983	SNRNP70	chr19:49588464-49611870	Less frequent than 10%
Amp	chr19:31000002-59128983	CCDC155	chr19:49891474-49921256	Less frequent than 10%
Amp	chr19:31000002-59128983	CD37	chr19:49838676-49843861	Less frequent than 10%
Amp	chr19:31000002-59128983	DKKL1	chr19:49866986-49878373	Less frequent than 10%
Amp	chr19:31000002-59128983	TEAD2	chr19:49843852-49865714	Less frequent than 10%
Amp	chr19:31000002-59128983	ALDH16A1	chr19:49956472-49974305	Less frequent than 10%
Amp	chr19:31000002-59128983	FCGRT	chr19:50015535-50029685	Less frequent than 10%
Amp	chr19:31000002-59128983	FLT3LG	chr19:49977465-49989488	Less frequent than 10%
Amp	chr19:31000002-59128983	PIH1D1	chr19:49949549-49955115	Less frequent than 10%
Amp	chr19:31000002-59128983	RCN3	chr19:50030874-50046890	Less frequent than 10%
Amp	chr19:31000002-59128983	IRF3	chr19:50162825-50169132	Less frequent than 10%
Amp	chr19:31000002-59128983	PRMT1	chr19:50180408-50191707	Less frequent than 10%
Amp	chr19:31000002-59128983	PRR12	chr19:50094911-50129696	Less frequent than 10%
Amp	chr19:31000002-59128983	PRRG2	chr19:50084586-50094265	Less frequent than 10%
Amp	chr19:31000002-59128983	SCAF1	chr19:50145381-50161906	Less frequent than 10%
Amp	chr19:31000002-59128983	AP2A1	chr19:50270179-50310369	Less frequent than 10%
Amp	chr19:31000002-59128983	FUZ	chr19:50310123-50316567	Less frequent than 10%
Amp	chr19:31000002-59128983	TSKS	chr19:50243010-50266515	Less frequent than 10%
Amp	chr19:31000002-59128983	AKT1S1	chr19:50372289-50381613	Less frequent than 10%
Amp	chr19:31000002-59128983	IL4I1	chr19:50392912-50432796	Less frequent than 10%
Amp	chr19:31000002-59128983	NUP62	chr19:50410083-50432988	Less frequent than 10%
Amp	chr19:31000002-59128983	PTOV1-AS1	chr19:50341902-50354933	Less frequent than 10%
Amp	chr19:31000002-59128983	TBC1D17	chr19:50380681-50392007	Less frequent than 10%
Amp	chr19:31000002-59128983	FLJ26850	chr19:50553936-50570052	Less frequent than 10%
Amp	chr19:31000002-59128983	VRK3	chr19:50479723-50528805	Less frequent than 10%
Amp	chr19:31000002-59128983	ZNF473	chr19:50529211-50552031	Less frequent than 10%
Amp	chr19:31000002-59128983	IZUMO2	chr19:50655804-50666538	Less frequent than 10%
Amp	chr19:31000002-59128983	KCNC3	chr19:50818764-50832634	Less frequent than 10%
Amp	chr19:31000002-59128983	NAPSB	chr19:50837056-50848005	Less frequent than 10%
Amp	chr19:31000002-59128983	FAM71E1	chr19:50970044-50980003	Less frequent than 10%
Amp	chr19:31000002-59128983	MYBPC2	chr19:50936159-50969583	Less frequent than 10%
Amp	chr19:31000002-59128983	POLD1	chr19:50887579-50921275	Less frequent than 10%
Amp	chr19:31000002-59128983	LRRC4B	chr19:51020149-51071302	Less frequent than 10%
Amp	chr19:31000002-59128983	SHANK1	chr19:51165083-51220195	Less frequent than 10%
Amp	chr19:31000002-59128983	SYT3	chr19:51125233-51143092	Less frequent than 10%
Amp	chr19:31000002-59128983	ACPT	chr19:51293671-51298481	Less frequent than 10%
Amp	chr19:31000002-59128983	KLK15	chr19:51328544-51334779	Less frequent than 10%
Amp	chr19:31000002-59128983	KLK3	chr19:51358170-51364020	Less frequent than 10%
Amp	chr19:31000002-59128983	KLK4	chr19:51409607-51413994	Less frequent than 10%
Amp	chr19:31000002-59128983	KLK6	chr19:51461886-51472929	Less frequent than 10%
Amp	chr19:31000002-59128983	KLKP1	chr19:51385351-51399654	Less frequent than 10%
Amp	chr19:31000002-59128983	CTU1	chr19:51600862-51611647	Less frequent than 10%
Amp	chr19:31000002-59128983	KLK11	chr19:51525486-51531290	Less frequent than 10%
Amp	chr19:31000002-59128983	KLK13	chr19:51559462-51568367	Less frequent than 10%
Amp	chr19:31000002-59128983	CD33	chr19:51728334-51743274	Less frequent than 10%
Amp	chr19:31000002-59128983	SIGLEC17P	chr19:51670584-51676780	Less frequent than 10%
Amp	chr19:31000002-59128983	SIGLECL1	chr19:51754331-51772582	Less frequent than 10%
Amp	chr19:31000002-59128983	CLDND2	chr19:51870351-51872257	Less frequent than 10%
Amp	chr19:31000002-59128983	ETFB	chr19:51848408-51869672	Less frequent than 10%
Amp	chr19:31000002-59128983	IGLON5	chr19:51815101-51834102	Less frequent than 10%
Amp	chr19:31000002-59128983	LIM2	chr19:51883162-51891210	Less frequent than 10%
Amp	chr19:31000002-59128983	VSIG10L	chr19:51834794-51845378	Less frequent than 10%
Amp	chr19:31000002-59128983	CEACAM18	chr19:51981896-51993859	Less frequent than 10%
Amp	chr19:31000002-59128983	SIGLEC10	chr19:51913274-51921057	Less frequent than 10%
Amp	chr19:31000002-59128983	SIGLEC12	chr19:51994480-52005043	Less frequent than 10%
Amp	chr19:31000002-59128983	SIGLEC5	chr19:52114755-52133727	Less frequent than 10%
Amp	chr19:31000002-59128983	ZNF175	chr19:52074530-52092991	Less frequent than 10%
Amp	chr19:31000002-59128983	FPR2	chr19:52264452-52273779	Less frequent than 10%
Amp	chr19:31000002-59128983	SPACA6P	chr19:52196592-52208443	Less frequent than 10%
Amp	chr19:31000002-59128983	FPR3	chr19:52298410-52329334	Less frequent than 10%
Amp	chr19:31000002-59128983	ZNF577	chr19:52359055-52391229	Less frequent than 10%
Amp	chr19:31000002-59128983	ZNF649	chr19:52392487-52408305	Less frequent than 10%
Amp	chr19:31000002-59128983	HCCAT3	chr19:52452386-52484620	Less frequent than 10%
Amp	chr19:31000002-59128983	ZNF350	chr19:52467592-52490079	Less frequent than 10%
Amp	chr19:31000002-59128983	ZNF432	chr19:52536676-52552073	Less frequent than 10%
Amp	chr19:31000002-59128983	ZNF613	chr19:52430687-52449011	Less frequent than 10%
Amp	chr19:31000002-59128983	ZNF614	chr19:52516576-52531680	Less frequent than 10%
Amp	chr19:31000002-59128983	ZNF615	chr19:52494586-52511483	Less frequent than 10%
Amp	chr19:31000002-59128983	ZNF616	chr19:52617652-52643191	Less frequent than 10%
Amp	chr19:31000002-59128983	ZNF836	chr19:52658124-52674896	Less frequent than 10%
Amp	chr19:31000002-59128983	ZNF841	chr19:52567718-52599018	Less frequent than 10%
Amp	chr19:31000002-59128983	PPP2R1A	chr19:52693054-52729678	Less frequent than 10%
Amp	chr19:31000002-59128983	ZNF766	chr19:52772823-52795976	Less frequent than 10%
Amp	chr19:31000002-59128983	ZNF528	chr19:52901120-52921657	Less frequent than 10%
Amp	chr19:31000002-59128983	ZNF534	chr19:52934666-52942699	Less frequent than 10%
Amp	chr19:31000002-59128983	ZNF610	chr19:52839497-52870376	Less frequent than 10%
Amp	chr19:31000002-59128983	ZNF880	chr19:52873169-52889046	Less frequent than 10%
Amp	chr19:31000002-59128983	ZNF578	chr19:52956828-53020131	Less frequent than 10%
Amp	chr19:31000002-59128983	ZNF808	chr19:53030908-53059303	Less frequent than 10%
Amp	chr19:31000002-59128983	ZNF137P	chr19:53099936-53103405	Less frequent than 10%
Amp	chr19:31000002-59128983	ZNF83	chr19:53115617-53193834	Less frequent than 10%
Amp	chr19:31000002-59128983	ZNF28	chr19:53300660-53324922	Less frequent than 10%
Amp	chr19:31000002-59128983	ZNF600	chr19:53268747-53290034	Less frequent than 10%
Amp	chr19:31000002-59128983	ZNF321P	chr19:53430387-53445847	Less frequent than 10%
Amp	chr19:31000002-59128983	ZNF816	chr19:53452631-53466164	Less frequent than 10%
Amp	chr19:31000002-59128983	ZNF816-ZNF321P	chr19:53430387-53466164	Less frequent than 10%
Amp	chr19:31000002-59128983	ZNF160	chr19:53569866-53606687	Less frequent than 10%
Amp	chr19:31000002-59128983	ZNF347	chr19:53641956-53662322	Less frequent than 10%
Amp	chr19:31000002-59128983	ZNF415	chr19:53611131-53636173	Less frequent than 10%
Amp	chr19:31000002-59128983	ZNF665	chr19:53666551-53696619	Less frequent than 10%
Amp	chr19:31000002-59128983	ZNF845	chr19:53837001-53858122	Less frequent than 10%
Amp	chr19:31000002-59128983	TPM3P9	chr19:53935226-53947925	Less frequent than 10%
Amp	chr19:31000002-59128983	ZNF761	chr19:53935226-53961515	Less frequent than 10%
Amp	chr19:31000002-59128983	ZNF765	chr19:53898396-53915262	Less frequent than 10%
Amp	chr19:31000002-59128983	ZNF813	chr19:53970988-53997546	Less frequent than 10%
Amp	chr19:31000002-59128983	ZNF331	chr19:54024176-54083523	Less frequent than 10%
Amp	chr19:31000002-59128983	MYADM	chr19:54369610-54379689	Less frequent than 10%
Amp	chr19:31000002-59128983	NLRP12	chr19:54296854-54327657	Less frequent than 10%
Amp	chr19:31000002-59128983	CACNG6	chr19:54494402-54515920	Less frequent than 10%
Amp	chr19:31000002-59128983	CACNG7	chr19:54415990-54446969	Less frequent than 10%
Amp	chr19:31000002-59128983	CACNG8	chr19:54466289-54493469	Less frequent than 10%
Amp	chr19:31000002-59128983	NDUFA3	chr19:54606159-54610281	Less frequent than 10%
Amp	chr19:31000002-59128983	PRPF31	chr19:54618789-54635150	Less frequent than 10%
Amp	chr19:31000002-59128983	TARM1	chr19:54573200-54584634	Less frequent than 10%
Amp	chr19:31000002-59128983	VSTM1	chr19:54544079-54567207	Less frequent than 10%
Amp	chr19:31000002-59128983	LILRB3	chr19:54720146-54726959	Less frequent than 10%
Amp	chr19:31000002-59128983	LILRB5	chr19:54754269-54761167	Less frequent than 10%
Amp	chr19:31000002-59128983	MBOAT7	chr19:54677105-54693733	Less frequent than 10%
Amp	chr19:31000002-59128983	RPS9	chr19:54704725-54711515	Less frequent than 10%
Amp	chr19:31000002-59128983	TMC4	chr19:54663832-54676944	Less frequent than 10%
Amp	chr19:31000002-59128983	LAIR1	chr19:54865234-54876721	Less frequent than 10%
Amp	chr19:31000002-59128983	LILRA5	chr19:54818352-54824409	Less frequent than 10%
Amp	chr19:31000002-59128983	LAIR2	chr19:55014012-55021900	Less frequent than 10%
Amp	chr19:31000002-59128983	LENG8	chr19:54960064-54973196	Less frequent than 10%
Amp	chr19:31000002-59128983	TTYH1	chr19:54926604-54947899	Less frequent than 10%
Amp	chr19:31000002-59128983	LILRB1	chr19:55128383-55149004	Less frequent than 10%
Amp	chr19:31000002-59128983	KIR2DL3	chr19:55249973-55264504	Less frequent than 10%
Amp	chr19:31000002-59128983	KIR3DL3	chr19:55235983-55248003	Less frequent than 10%
Amp	chr19:31000002-59128983	FCAR	chr19:55385548-55401839	Less frequent than 10%
Amp	chr19:31000002-59128983	KIR2DS4	chr19:55344130-55360024	Less frequent than 10%
Amp	chr19:31000002-59128983	KIR3DL1	chr19:55327892-55342233	Less frequent than 10%
Amp	chr19:31000002-59128983	KIR3DL2	chr19:55361897-55378670	Less frequent than 10%
Amp	chr19:31000002-59128983	GP6	chr19:55525074-55549632	Less frequent than 10%
Amp	chr19:31000002-59128983	NLRP2	chr19:55476651-55512510	Less frequent than 10%
Amp	chr19:31000002-59128983	DNAAF3	chr19:55670028-55678090	Less frequent than 10%
Amp	chr19:31000002-59128983	EPS8L1	chr19:55587220-55599291	Less frequent than 10%
Amp	chr19:31000002-59128983	PPP1R12C	chr19:55602280-55628968	Less frequent than 10%
Amp	chr19:31000002-59128983	SYT5	chr19:55684468-55691720	Less frequent than 10%
Amp	chr19:31000002-59128983	TNNT1	chr19:55644160-55660606	Less frequent than 10%
Amp	chr19:31000002-59128983	BRSK1	chr19:55795533-55823903	Less frequent than 10%
Amp	chr19:31000002-59128983	HSPBP1	chr19:55773590-55791751	Less frequent than 10%
Amp	chr19:31000002-59128983	PPP6R1	chr19:55741146-55770038	Less frequent than 10%
Amp	chr19:31000002-59128983	TMEM86B	chr19:55738001-55740632	Less frequent than 10%
Amp	chr19:31000002-59128983	FAM71E2	chr19:55866275-55874620	Less frequent than 10%
Amp	chr19:31000002-59128983	RPL28	chr19:55897299-55903451	Less frequent than 10%
Amp	chr19:31000002-59128983	SHISA7	chr19:55940104-55954230	Less frequent than 10%
Amp	chr19:31000002-59128983	SUV420H2	chr19:55851220-55859489	Less frequent than 10%
Amp	chr19:31000002-59128983	UBE2S	chr19:55912649-55919325	Less frequent than 10%
Amp	chr19:31000002-59128983	SSC5D	chr19:55999869-56030466	Less frequent than 10%
Amp	chr19:31000002-59128983	CCDC106	chr19:56158953-56164526	Less frequent than 10%
Amp	chr19:31000002-59128983	EPN1	chr19:56186560-56207133	Less frequent than 10%
Amp	chr19:31000002-59128983	U2AF2	chr19:56165415-56186082	Less frequent than 10%
Amp	chr19:31000002-59128983	NLRP11	chr19:56296762-56348128	Less frequent than 10%
Amp	chr19:31000002-59128983	NLRP13	chr19:56407310-56443702	Less frequent than 10%
Amp	chr19:31000002-59128983	NLRP5	chr19:56511091-56573174	Less frequent than 10%
Amp	chr19:31000002-59128983	GALP	chr19:56687388-56697144	Less frequent than 10%
Amp	chr19:31000002-59128983	ZNF444	chr19:56652534-56672262	Less frequent than 10%
Amp	chr19:31000002-59128983	ZSCAN5A	chr19:56732678-56739659	Less frequent than 10%
Amp	chr19:31000002-59128983	ZNF582	chr19:56894647-56904889	Less frequent than 10%
Amp	chr19:31000002-59128983	ZNF583	chr19:56915382-56936400	Less frequent than 10%
Amp	chr19:31000002-59128983	ZNF667	chr19:56950692-56988770	Less frequent than 10%
Amp	chr19:31000002-59128983	ZNF667-AS1	chr19:56989242-57006805	Less frequent than 10%
Amp	chr19:31000002-59128983	ZFP28	chr19:57050316-57068170	Less frequent than 10%
Amp	chr19:31000002-59128983	ZNF470	chr19:57078889-57094262	Less frequent than 10%
Amp	chr19:31000002-59128983	ZNF471	chr19:57019211-57040269	Less frequent than 10%
Amp	chr19:31000002-59128983	ZNF71	chr19:57106663-57135544	Less frequent than 10%
Amp	chr19:31000002-59128983	SMIM17	chr19:57154526-57168614	Less frequent than 10%
Amp	chr19:31000002-59128983	ZNF835	chr19:57174019-57183123	Less frequent than 10%
Amp	chr19:31000002-59128983	PEG3	chr19:57321444-57352094	Less frequent than 10%
Amp	chr19:31000002-59128983	ZIM2	chr19:57285922-57352097	Less frequent than 10%
Amp	chr19:31000002-59128983	USP29	chr19:57631508-57643293	Less frequent than 10%
Amp	chr19:31000002-59128983	ZIM3	chr19:57645463-57656570	Less frequent than 10%
Amp	chr19:31000002-59128983	ZNF264	chr19:57702867-57734214	Less frequent than 10%
Amp	chr19:31000002-59128983	ZNF805	chr19:57752052-57774106	Less frequent than 10%
Amp	chr19:31000002-59128983	ZNF304	chr19:57862644-57871265	Less frequent than 10%
Amp	chr19:31000002-59128983	ZNF543	chr19:57831864-57842144	Less frequent than 10%
Amp	chr19:31000002-59128983	ZNF547	chr19:57874890-57890925	Less frequent than 10%
Amp	chr19:31000002-59128983	VN1R1	chr19:57966541-57968107	Less frequent than 10%
Amp	chr19:31000002-59128983	ZNF419	chr19:57999078-58006048	Less frequent than 10%
Amp	chr19:31000002-59128983	ZNF549	chr19:58038692-58052244	Less frequent than 10%
Amp	chr19:31000002-59128983	ZNF749	chr19:57946692-57957191	Less frequent than 10%
Amp	chr19:31000002-59128983	ZNF772	chr19:57980953-57988938	Less frequent than 10%
Amp	chr19:31000002-59128983	ZNF773	chr19:58011308-58019510	Less frequent than 10%
Amp	chr19:31000002-59128983	ZIK1	chr19:58095627-58103758	Less frequent than 10%
Amp	chr19:31000002-59128983	ZNF134	chr19:58125829-58133636	Less frequent than 10%
Amp	chr19:31000002-59128983	ZNF211	chr19:58144534-58154147	Less frequent than 10%
Amp	chr19:31000002-59128983	ZNF530	chr19:58111252-58119637	Less frequent than 10%
Amp	chr19:31000002-59128983	ZNF154	chr19:58211809-58220579	Less frequent than 10%
Amp	chr19:31000002-59128983	ZNF776	chr19:58258163-58269527	Less frequent than 10%
Amp	chr19:31000002-59128983	ZNF417	chr19:58417141-58427978	Less frequent than 10%
Amp	chr19:31000002-59128983	ZNF418	chr19:58433251-58446740	Less frequent than 10%
Amp	chr19:31000002-59128983	ZNF587	chr19:58361180-58376491	Less frequent than 10%
Amp	chr19:31000002-59128983	ZNF587B	chr19:58341661-58357606	Less frequent than 10%
Amp	chr19:31000002-59128983	ZNF814	chr19:58380746-58400442	Less frequent than 10%
Amp	chr19:31000002-59128983	C19orf18	chr19:58469804-58485902	Less frequent than 10%
Amp	chr19:31000002-59128983	ZNF135	chr19:58570606-58581110	Less frequent than 10%
Amp	chr19:31000002-59128983	ZNF606	chr19:58488440-58514714	Less frequent than 10%
Amp	chr19:31000002-59128983	ZSCAN1	chr19:58545433-58565999	Less frequent than 10%
Amp	chr19:31000002-59128983	ZNF329	chr19:58637694-58662148	Less frequent than 10%
Amp	chr19:31000002-59128983	ZSCAN18	chr19:58595208-58629793	Less frequent than 10%
Amp	chr19:31000002-59128983	ZNF544	chr19:58740069-58775008	Less frequent than 10%
Amp	chr19:31000002-59128983	ZNF8	chr19:58790317-58807254	Less frequent than 10%
Amp	chr19:31000002-59128983	RPS5	chr19:58898635-58906171	Less frequent than 10%
Amp	chr19:31000002-59128983	ZNF132	chr19:58944180-58951589	Less frequent than 10%
Amp	chr19:31000002-59128983	ZNF324B	chr19:58962970-58969199	Less frequent than 10%
Amp	chr19:31000002-59128983	ZNF497	chr19:58865722-58874214	Less frequent than 10%
Amp	chr19:31000002-59128983	ZNF837	chr19:58878989-58892389	Less frequent than 10%
Amp	chr19:31000002-59128983	CHMP2A	chr19:59062932-59066486	Less frequent than 10%
Amp	chr19:31000002-59128983	LOC100131691	chr19:59070552-59086164	Less frequent than 10%
Amp	chr19:31000002-59128983	MZF1	chr19:59073283-59084942	Less frequent than 10%
Amp	chr19:31000002-59128983	SLC27A5	chr19:59009699-59023432	Less frequent than 10%
Amp	chr19:31000002-59128983	ZNF536	chr19:30863327-31048965	Less frequent than 10%
Amp	chr19:31000002-59128983	ANKRD27	chr19:33087906-33166102	Less frequent than 10%
Amp	chr19:31000002-59128983	CEP89	chr19:33369903-33462869	Less frequent than 10%
Amp	chr19:31000002-59128983	DPY19L3	chr19:32896654-32976799	Less frequent than 10%
Amp	chr19:31000002-59128983	CHST8	chr19:34112860-34264414	Less frequent than 10%
Amp	chr19:31000002-59128983	PEPD	chr19:33877854-34012799	Less frequent than 10%
Amp	chr19:31000002-59128983	GPI	chr19:34855644-34893318	Less frequent than 10%
Amp	chr19:31000002-59128983	LINC00904	chr19:35382932-35389847	Less frequent than 10%
Amp	chr19:31000002-59128983	ZNF599	chr19:35248978-35264134	Less frequent than 10%
Amp	chr19:31000002-59128983	ATP4A	chr19:36041094-36054560	Less frequent than 10%
Amp	chr19:31000002-59128983	WDR62	chr19:36545782-36596012	Less frequent than 10%
Amp	chr19:31000002-59128983	ZFP14	chr19:36825354-36870105	Less frequent than 10%
Amp	chr19:31000002-59128983	ZNF345	chr19:37341259-37384120	Less frequent than 10%
Amp	chr19:31000002-59128983	ZNF420	chr19:37569381-37620651	Less frequent than 10%
Amp	chr19:31000002-59128983	ZNF529	chr19:37034516-37096178	Less frequent than 10%
Amp	chr19:31000002-59128983	ZNF566	chr19:36936020-36980463	Less frequent than 10%
Amp	chr19:31000002-59128983	ZNF568	chr19:37407230-37488834	Less frequent than 10%
Amp	chr19:31000002-59128983	SIPA1L3	chr19:38397867-38699008	Less frequent than 10%
Amp	chr19:31000002-59128983	ZFP30	chr19:38123388-38146313	Less frequent than 10%
Amp	chr19:31000002-59128983	ZNF527	chr19:37862058-37883966	Less frequent than 10%
Amp	chr19:31000002-59128983	ZNF793	chr19:37997840-38034239	Less frequent than 10%
Amp	chr19:31000002-59128983	ACTN4	chr19:39138266-39221171	Less frequent than 10%
Amp	chr19:31000002-59128983	ECH1	chr19:39306061-39322497	Less frequent than 10%
Amp	chr19:31000002-59128983	FBXO17	chr19:39432040-39466453	Less frequent than 10%
Amp	chr19:31000002-59128983	PAPL	chr19:39574944-39602128	Less frequent than 10%
Amp	chr19:31000002-59128983	RYR1	chr19:38924339-39078204	Less frequent than 10%
Amp	chr19:31000002-59128983	AKT2	chr19:40736223-40791302	Less frequent than 10%
Amp	chr19:31000002-59128983	FCGBP	chr19:40353962-40440533	Less frequent than 10%
Amp	chr19:31000002-59128983	TIMM50	chr19:39971051-39981528	Less frequent than 10%
Amp	chr19:31000002-59128983	HNRNPUL1	chr19:41768390-41813811	Less frequent than 10%
Amp	chr19:31000002-59128983	MIA-RAB4B	chr19:41281441-41302849	Less frequent than 10%
Amp	chr19:31000002-59128983	RAB4B	chr19:41284123-41302849	Less frequent than 10%
Amp	chr19:31000002-59128983	RAB4B-EGLN2	chr19:41284123-41314346	Less frequent than 10%
Amp	chr19:31000002-59128983	SPTBN4	chr19:40973125-41082365	Less frequent than 10%
Amp	chr19:31000002-59128983	MEGF8	chr19:42829760-42882921	Less frequent than 10%
Amp	chr19:31000002-59128983	POU2F2	chr19:42590261-42636625	Less frequent than 10%
Amp	chr19:31000002-59128983	ZNF526	chr19:42724491-42732353	Less frequent than 10%
Amp	chr19:31000002-59128983	PSG11	chr19:43511808-43530631	Less frequent than 10%
Amp	chr19:31000002-59128983	TEX101	chr19:43892762-43922767	Less frequent than 10%
Amp	chr19:31000002-59128983	LYPD5	chr19:44300078-44324808	Less frequent than 10%
Amp	chr19:31000002-59128983	PLAUR	chr19:44150246-44174498	Less frequent than 10%
Amp	chr19:31000002-59128983	ZNF223	chr19:44556163-44572142	Less frequent than 10%
Amp	chr19:31000002-59128983	ZNF45	chr19:44416775-44439411	Less frequent than 10%
Amp	chr19:31000002-59128983	CLPTM1	chr19:45457841-45496604	Less frequent than 10%
Amp	chr19:31000002-59128983	PPP1R37	chr19:45596430-45650543	Less frequent than 10%
Amp	chr19:31000002-59128983	PVRL2	chr19:45349392-45392485	Less frequent than 10%
Amp	chr19:31000002-59128983	IGFL2	chr19:46651038-46664561	Less frequent than 10%
Amp	chr19:31000002-59128983	MYPOP	chr19:46393280-46405862	Less frequent than 10%
Amp	chr19:31000002-59128983	PPP5D1	chr19:46984044-47104457	Less frequent than 10%
Amp	chr19:31000002-59128983	RNU6-66P	chr19:46720994-46809806	Less frequent than 10%
Amp	chr19:31000002-59128983	SIX5	chr19:46268042-46272497	Less frequent than 10%
Amp	chr19:31000002-59128983	ARHGAP35	chr19:47421932-47508333	Less frequent than 10%
Amp	chr19:31000002-59128983	C5AR2	chr19:47835403-47845272	Less frequent than 10%
Amp	chr19:31000002-59128983	SAE1	chr19:47634079-47713893	Less frequent than 10%
Amp	chr19:31000002-59128983	SLC8A2	chr19:47931278-47975307	Less frequent than 10%
Amp	chr19:31000002-59128983	ZC3H4	chr19:47567446-47617009	Less frequent than 10%
Amp	chr19:31000002-59128983	CARD8	chr19:48711342-48759203	Less frequent than 10%
Amp	chr19:31000002-59128983	KDELR1	chr19:48885826-48894810	Less frequent than 10%
Amp	chr19:31000002-59128983	LIG1	chr19:48618702-48673560	Less frequent than 10%
Amp	chr19:31000002-59128983	SEC1P	chr19:49141295-49185502	Less frequent than 10%
Amp	chr19:31000002-59128983	CPT1C	chr19:50194364-50216988	Less frequent than 10%
Amp	chr19:31000002-59128983	NOSIP	chr19:50058724-50083829	Less frequent than 10%
Amp	chr19:31000002-59128983	NUCB1	chr19:49403306-49426540	Less frequent than 10%
Amp	chr19:31000002-59128983	SLC17A7	chr19:49932654-49944808	Less frequent than 10%
Amp	chr19:31000002-59128983	SLC6A16	chr19:49792891-49828474	Less frequent than 10%
Amp	chr19:31000002-59128983	TRPM4	chr19:49661015-49715098	Less frequent than 10%
Amp	chr19:31000002-59128983	MYH14	chr19:50706884-50813801	Less frequent than 10%
Amp	chr19:31000002-59128983	SIGLEC11	chr19:50452249-50464429	Less frequent than 10%
Amp	chr19:31000002-59128983	KLK9	chr19:51505768-51512890	Less frequent than 10%
Amp	chr19:31000002-59128983	ZNF468	chr19:53341784-53360902	Less frequent than 10%
Amp	chr19:31000002-59128983	ZNF480	chr19:52800425-52829174	Less frequent than 10%
Amp	chr19:31000002-59128983	ZNF611	chr19:53206065-53238307	Less frequent than 10%
Amp	chr19:31000002-59128983	ZNF701	chr19:53073525-53090427	Less frequent than 10%
Amp	chr19:31000002-59128983	PRKCG	chr19:54385466-54410901	Less frequent than 10%
Amp	chr19:31000002-59128983	ZNF525	chr19:53868967-53889841	Less frequent than 10%
Amp	chr19:31000002-59128983	ZNF677	chr19:53738637-53758111	Less frequent than 10%
Amp	chr19:31000002-59128983	CNOT3	chr19:54641435-54659446	Less frequent than 10%
Amp	chr19:31000002-59128983	KIR3DX1	chr19:55043908-55057024	Less frequent than 10%
Amp	chr19:31000002-59128983	LILRB4	chr19:55174270-55181810	Less frequent than 10%
Amp	chr19:31000002-59128983	NLRP7	chr19:55434876-55458873	Less frequent than 10%
Amp	chr19:31000002-59128983	ISOC2	chr19:55964345-55973049	Less frequent than 10%
Amp	chr19:31000002-59128983	NLRP4	chr19:56347943-56393220	Less frequent than 10%
Amp	chr19:31000002-59128983	NLRP8	chr19:56459197-56499995	Less frequent than 10%
Amp	chr19:31000002-59128983	NLRP9	chr19:56219797-56249768	Less frequent than 10%
Amp	chr19:31000002-59128983	PTPRH	chr19:55692614-55720874	Less frequent than 10%
Amp	chr19:31000002-59128983	TMEM150B	chr19:55824168-55836708	Less frequent than 10%
Amp	chr19:31000002-59128983	ZNF542	chr19:56879467-56891196	Less frequent than 10%
Amp	chr19:31000002-59128983	ZNF256	chr19:58452200-58459077	Less frequent than 10%
Amp	chr19:31000002-59128983	ZNF460	chr19:57791852-57805436	Less frequent than 10%
Amp	chr19:31000002-59128983	ZNF550	chr19:58053203-58071231	Less frequent than 10%
Amp	chr19:31000002-59128983	ZNF551	chr19:58193336-58201169	Less frequent than 10%
Amp	chr19:31000002-59128983	ZNF324	chr19:58978411-58984945	Less frequent than 10%
Amp	chr19:31000002-59128983	ZSCAN22	chr19:58838384-58853712	Less frequent than 10%
Amp	chr19:31000002-59128983	FXYD5	chr19:35645624-35660788	Less frequent than 10%
Amp	chr19:31000002-59128983	HIPK4	chr19:40885177-40896094	Less frequent than 10%
Amp	chr19:31000002-59128983	SAMD4B	chr19:39833107-39875537	Less frequent than 10%
Amp	chr19:31000002-59128983	YIF1B	chr19:38794199-38806606	Less frequent than 10%
Amp	chr19:31000002-59128983	ZNF565	chr19:36673186-36705986	Less frequent than 10%
Amp	chr19:31000002-59128983	EHD2	chr19:48216600-48246391	Less frequent than 10%
Amp	chr19:31000002-59128983	EML2	chr19:46112657-46148775	Less frequent than 10%
Amp	chr19:31000002-59128983	LIPE-AS1	chr19:42901299-43156507	Less frequent than 10%
Amp	chr19:31000002-59128983	PRKD2	chr19:47177572-47220384	Less frequent than 10%
Amp	chr19:31000002-59128983	ZNF575	chr19:44037339-44040284	Less frequent than 10%
Amp	chr19:31000002-59128983	DUXA	chr19:57663093-57678856	Less frequent than 10%
Amp	chr19:31000002-59128983	KLK2	chr19:51376688-51383823	Less frequent than 10%
Amp	chr19:31000002-59128983	RDH13	chr19:55555691-55580914	Less frequent than 10%
Amp	chr19:31000002-59128983	ZNF702P	chr19:53471503-53496784	Less frequent than 10%
Amp	chr19:31000002-59128983	ZNF787	chr19:56598731-56632649	Less frequent than 10%
Amp	chr19:31000002-59128983	ATP5SL	chr19:41937222-41945843	Less frequent than 10%
Amp	chr19:31000002-59128983	KIR2DL4	chr19:57208-55325972	Less frequent than 10%
Amp	chr19:31000002-59128983	LOC100287534	chr19:46645-55325972	Less frequent than 10%
Amp	chr19:31000002-59128983	MED25	chr19:50321535-50340237	Less frequent than 10%
Amp	chr19:31000002-59128983	RHPN2	chr19:33469497-33555824	Less frequent than 10%
Amp	chr19:31000002-59128983	SNAR-A10	chr19:48427035-50631779	Less frequent than 10%
Amp	chr19:31000002-59128983	SNAR-A11	chr19:48427035-50631779	Less frequent than 10%
Amp	chr19:31000002-59128983	SNAR-A14	chr19:48427035-50631779	Less frequent than 10%
Amp	chr19:31000002-59128983	SNAR-A3	chr19:48427035-50631779	Less frequent than 10%
Amp	chr19:31000002-59128983	SNAR-A4	chr19:48427035-50631779	Less frequent than 10%
Amp	chr19:31000002-59128983	SNAR-A5	chr19:48427035-50631779	Less frequent than 10%
Amp	chr19:31000002-59128983	SNAR-A6	chr19:48427035-50631779	Less frequent than 10%
Amp	chr19:31000002-59128983	SNAR-A7	chr19:48427035-50631779	Less frequent than 10%
Amp	chr19:31000002-59128983	SNAR-A8	chr19:48427035-50631779	Less frequent than 10%
Amp	chr19:31000002-59128983	SNAR-A9	chr19:48427035-50631779	Less frequent than 10%
Amp	chr19:31000002-59128983	ZNF274	chr19:58694355-58724928	Less frequent than 10%
Del	chr8:1-27000000	OR4F21	chr8:116085-117024	Less frequent than 10%
Del	chr8:1-27000000	MIR596	chr8:1765396-1765473	Less frequent than 10%
Del	chr8:1-27000000	LOC100287015	chr8:6261076-6264069	Less frequent than 10%
Del	chr8:1-27000000	LOC100652791	chr8:6693075-6699975	Less frequent than 10%
Del	chr8:1-27000000	DEFA4	chr8:6793344-6795786	Less frequent than 10%
Del	chr8:1-27000000	DEFA8P	chr8:6808247-6809121	Less frequent than 10%
Del	chr8:1-27000000	DEFA10P	chr8:6825662-6826635	Less frequent than 10%
Del	chr8:1-27000000	DEFA9P	chr8:6816810-6817683	Less frequent than 10%
Del	chr8:1-27000000	DEFA3	chr8:6873390-6875816	Less frequent than 10%
Del	chr8:1-27000000	DEFA11P	chr8:6886122-6887011	Less frequent than 10%
Del	chr8:1-27000000	USP17L1P	chr8:7189908-7191501	Less frequent than 10%
Del	chr8:1-27000000	USP17L4	chr8:7194636-7196229	Less frequent than 10%
Del	chr8:1-27000000	ZNF705G	chr8:7215497-7220490	Less frequent than 10%
Del	chr8:1-27000000	DEFB4B	chr8:7272384-7274354	Less frequent than 10%
Del	chr8:1-27000000	FAM90A10P	chr8:7627105-7628835	Less frequent than 10%
Del	chr8:1-27000000	DEFB4A	chr8:7752198-7754237	Less frequent than 10%
Del	chr8:1-27000000	USP17L8	chr8:7829182-7830775	Less frequent than 10%
Del	chr8:1-27000000	USP17L3	chr8:7833914-7835507	Less frequent than 10%
Del	chr8:1-27000000	MIR548I3	chr8:7946462-7946611	Less frequent than 10%
Del	chr8:1-27000000	CLDN23	chr8:8559665-8561617	Less frequent than 10%
Del	chr8:1-27000000	MIR4660	chr8:8905954-8906028	Less frequent than 10%
Del	chr8:1-27000000	MIR597	chr8:9599181-9599278	Less frequent than 10%
Del	chr8:1-27000000	LINC00599	chr8:9757573-9760839	Less frequent than 10%
Del	chr8:1-27000000	MIR124-1	chr8:9760897-9760982	Less frequent than 10%
Del	chr8:1-27000000	MIR1322	chr8:10682882-10682953	Less frequent than 10%
Del	chr8:1-27000000	MIR598	chr8:10892715-10892812	Less frequent than 10%
Del	chr8:1-27000000	SLC35G5	chr8:11188494-11189695	Less frequent than 10%
Del	chr8:1-27000000	C8orf49	chr8:11618764-11620732	Less frequent than 10%
Del	chr8:1-27000000	DEFB135	chr8:11839829-11842099	Less frequent than 10%
Del	chr8:1-27000000	DEFB136	chr8:11831445-11832108	Less frequent than 10%
Del	chr8:1-27000000	DEFB134	chr8:11851488-11853760	Less frequent than 10%
Del	chr8:1-27000000	LOC392196	chr8:11985366-11986806	Less frequent than 10%
Del	chr8:1-27000000	USP17L7	chr8:11989925-11991518	Less frequent than 10%
Del	chr8:1-27000000	USP17L2	chr8:11994676-11996269	Less frequent than 10%
Del	chr8:1-27000000	FAM90A2P	chr8:12030962-12034776	Less frequent than 10%
Del	chr8:1-27000000	LOC649352	chr8:12236775-12237298	Less frequent than 10%
Del	chr8:1-27000000	FAM90A25P	chr8:12272029-12275541	Less frequent than 10%
Del	chr8:1-27000000	MIR3926-1	chr8:12584740-12584813	Less frequent than 10%
Del	chr8:1-27000000	MIR3926-2	chr8:12584745-12584808	Less frequent than 10%
Del	chr8:1-27000000	C8orf48	chr8:13424351-13425797	Less frequent than 10%
Del	chr8:1-27000000	MIR383	chr8:14710946-14711019	Less frequent than 10%
Del	chr8:1-27000000	LZTS1	chr8:20103675-20112803	Less frequent than 10%
Del	chr8:1-27000000	DOK2	chr8:21766383-21771205	Less frequent than 10%
Del	chr8:1-27000000	NUDT18	chr8:21964382-21966932	Less frequent than 10%
Del	chr8:1-27000000	REEP4	chr8:21995532-21999448	Less frequent than 10%
Del	chr8:1-27000000	LGI3	chr8:22004342-22014344	Less frequent than 10%
Del	chr8:1-27000000	MIR320A	chr8:22102474-22102556	Less frequent than 10%
Del	chr8:1-27000000	POLR3D	chr8:22102618-22108680	Less frequent than 10%
Del	chr8:1-27000000	C8orf58	chr8:22457113-22461662	Less frequent than 10%
Del	chr8:1-27000000	BIN3-IT1	chr8:22497883-22499722	Less frequent than 10%
Del	chr8:1-27000000	EGR3	chr8:22545173-22550815	Less frequent than 10%
Del	chr8:1-27000000	NKX3-1	chr8:23536205-23540450	Less frequent than 10%
Del	chr8:1-27000000	NEFL	chr8:24808468-24814383	Less frequent than 10%
Del	chr8:1-27000000	PNMA2	chr8:26362195-26371483	Less frequent than 10%
Del	chr8:1-27000000	RPL23AP53	chr8:158344-182318	Less frequent than 10%
Del	chr8:1-27000000	ZNF596	chr8:182199-197339	Less frequent than 10%
Del	chr8:1-27000000	FAM87A	chr8:325930-333174	Less frequent than 10%
Del	chr8:1-27000000	TDRP	chr8:439789-495781	Less frequent than 10%
Del	chr8:1-27000000	LOC286083	chr8:1244293-1250827	Less frequent than 10%
Del	chr8:1-27000000	LOC100507435	chr8:1513675-1569830	Less frequent than 10%
Del	chr8:1-27000000	CLN8	chr8:1711869-1734736	Less frequent than 10%
Del	chr8:1-27000000	KBTBD11	chr8:1922043-1955109	Less frequent than 10%
Del	chr8:1-27000000	MYOM2	chr8:1993157-2093380	Less frequent than 10%
Del	chr8:1-27000000	ANGPT2	chr8:6357174-6420784	Less frequent than 10%
Del	chr8:1-27000000	AGPAT5	chr8:6565877-6619021	Less frequent than 10%
Del	chr8:1-27000000	MIR4659A	chr8:6602684-6602765	Less frequent than 10%
Del	chr8:1-27000000	MIR4659B	chr8:6602688-6602761	Less frequent than 10%
Del	chr8:1-27000000	DEFA6	chr8:6782215-6783598	Less frequent than 10%
Del	chr8:1-27000000	DEFB1	chr8:6728096-6735529	Less frequent than 10%
Del	chr8:1-27000000	DEFA1	chr8:6835170-6875823	Less frequent than 10%
Del	chr8:1-27000000	DEFA1B	chr8:6835170-6875823	Less frequent than 10%
Del	chr8:1-27000000	DEFA5	chr8:6912828-6914259	Less frequent than 10%
Del	chr8:1-27000000	DEFT1P	chr8:6844699-6866346	Less frequent than 10%
Del	chr8:1-27000000	DEFT1P2	chr8:6844699-6866346	Less frequent than 10%
Del	chr8:1-27000000	LINC00965	chr8:7118140-7143880	Less frequent than 10%
Del	chr8:1-27000000	FAM90A7P	chr8:7413659-7431920	Less frequent than 10%
Del	chr8:1-27000000	SPAG11A	chr8:7705401-7721319	Less frequent than 10%
Del	chr8:1-27000000	ZNF705B	chr8:7783858-7809935	Less frequent than 10%
Del	chr8:1-27000000	FAM86B3P	chr8:8086091-8102387	Less frequent than 10%
Del	chr8:1-27000000	SGK223	chr8:8175257-8239257	Less frequent than 10%
Del	chr8:1-27000000	ERI1	chr8:8860313-8890849	Less frequent than 10%
Del	chr8:1-27000000	PPP1R3B	chr8:8993763-9009152	Less frequent than 10%
Del	chr8:1-27000000	LOC157273	chr8:9182560-9192590	Less frequent than 10%
Del	chr8:1-27000000	PRSS55	chr8:10383055-10411676	Less frequent than 10%
Del	chr8:1-27000000	C8orf74	chr8:10530146-10558103	Less frequent than 10%
Del	chr8:1-27000000	SOX7	chr8:10581277-10588084	Less frequent than 10%
Del	chr8:1-27000000	PINX1	chr8:10622470-10697409	Less frequent than 10%
Del	chr8:1-27000000	MTMR9	chr8:11141999-11185654	Less frequent than 10%
Del	chr8:1-27000000	TDH	chr8:11197145-11225961	Less frequent than 10%
Del	chr8:1-27000000	FAM167A	chr8:11278972-11324276	Less frequent than 10%
Del	chr8:1-27000000	LINC00208	chr8:11434043-11438850	Less frequent than 10%
Del	chr8:1-27000000	GATA4	chr8:11561716-11617509	Less frequent than 10%
Del	chr8:1-27000000	NEIL2	chr8:11627171-11644854	Less frequent than 10%
Del	chr8:1-27000000	CTSB	chr8:11700033-11725646	Less frequent than 10%
Del	chr8:1-27000000	FAM66D	chr8:11973290-12008698	Less frequent than 10%
Del	chr8:1-27000000	FAM86B1	chr8:12039612-12051624	Less frequent than 10%
Del	chr8:1-27000000	ZNF705D	chr8:11946846-11973025	Less frequent than 10%
Del	chr8:1-27000000	DEFB109P1	chr8:12250792-12257874	Less frequent than 10%
Del	chr8:1-27000000	FAM66A	chr8:12219527-12268510	Less frequent than 10%
Del	chr8:1-27000000	FAM86B2	chr8:12283123-12293852	Less frequent than 10%
Del	chr8:1-27000000	LINC00681	chr8:12651751-12675800	Less frequent than 10%
Del	chr8:1-27000000	LOC340357	chr8:12623570-12668910	Less frequent than 10%
Del	chr8:1-27000000	FGF20	chr8:16850333-16859674	Less frequent than 10%
Del	chr8:1-27000000	CNOT7	chr8:17086739-17104387	Less frequent than 10%
Del	chr8:1-27000000	VPS37A	chr8:17104400-17155533	Less frequent than 10%
Del	chr8:1-27000000	SLC7A2	chr8:17354596-17428077	Less frequent than 10%
Del	chr8:1-27000000	PDGFRL	chr8:17433941-17500642	Less frequent than 10%
Del	chr8:1-27000000	FGL1	chr8:17721899-17753047	Less frequent than 10%
Del	chr8:1-27000000	ASAH1	chr8:17913924-17942507	Less frequent than 10%
Del	chr8:1-27000000	NAT1	chr8:18027970-18081198	Less frequent than 10%
Del	chr8:1-27000000	NAT2	chr8:18248754-18258723	Less frequent than 10%
Del	chr8:1-27000000	LOC100128993	chr8:19041185-19103032	Less frequent than 10%
Del	chr8:1-27000000	SH2D4A	chr8:19171080-19253729	Less frequent than 10%
Del	chr8:1-27000000	INTS10	chr8:19674917-19709586	Less frequent than 10%
Del	chr8:1-27000000	LPL	chr8:19796581-19824770	Less frequent than 10%
Del	chr8:1-27000000	SLC18A1	chr8:20002365-20040717	Less frequent than 10%
Del	chr8:1-27000000	ATP6V1B2	chr8:20054703-20079207	Less frequent than 10%
Del	chr8:1-27000000	LZTS1-AS1	chr8:20133283-20147969	Less frequent than 10%
Del	chr8:1-27000000	XPO7	chr8:21777179-21864096	Less frequent than 10%
Del	chr8:1-27000000	DMTN	chr8:21911080-21940036	Less frequent than 10%
Del	chr8:1-27000000	FAM160B2	chr8:21946713-21961891	Less frequent than 10%
Del	chr8:1-27000000	FGF17	chr8:21900427-21906319	Less frequent than 10%
Del	chr8:1-27000000	HR	chr8:21971931-21988565	Less frequent than 10%
Del	chr8:1-27000000	BMP1	chr8:22022652-22069840	Less frequent than 10%
Del	chr8:1-27000000	PHYHIP	chr8:22077215-22089851	Less frequent than 10%
Del	chr8:1-27000000	PPP3CC	chr8:22298482-22398657	Less frequent than 10%
Del	chr8:1-27000000	BIN3	chr8:22477946-22526661	Less frequent than 10%
Del	chr8:1-27000000	CCAR2	chr8:22462144-22477983	Less frequent than 10%
Del	chr8:1-27000000	PDLIM2	chr8:22436253-22455538	Less frequent than 10%
Del	chr8:1-27000000	RHOBTB2	chr8:22844929-22877710	Less frequent than 10%
Del	chr8:1-27000000	TNFRSF10B	chr8:22877647-22926700	Less frequent than 10%
Del	chr8:1-27000000	LOC254896	chr8:22941867-22961070	Less frequent than 10%
Del	chr8:1-27000000	TNFRSF10C	chr8:22960326-22974950	Less frequent than 10%
Del	chr8:1-27000000	TNFRSF10D	chr8:22993100-23021543	Less frequent than 10%
Del	chr8:1-27000000	CHMP7	chr8:23101149-23119512	Less frequent than 10%
Del	chr8:1-27000000	LOC389641	chr8:23082733-23088439	Less frequent than 10%
Del	chr8:1-27000000	R3HCC1	chr8:23145611-23153792	Less frequent than 10%
Del	chr8:1-27000000	ENTPD4	chr8:23286664-23315244	Less frequent than 10%
Del	chr8:1-27000000	SLC25A37	chr8:23386362-23430063	Less frequent than 10%
Del	chr8:1-27000000	NKX2-6	chr8:23559963-23564111	Less frequent than 10%
Del	chr8:1-27000000	STC1	chr8:23699433-23712320	Less frequent than 10%
Del	chr8:1-27000000	ADAM28	chr8:24151579-24212726	Less frequent than 10%
Del	chr8:1-27000000	ADAM7	chr8:24298508-24367077	Less frequent than 10%
Del	chr8:1-27000000	GNRH1	chr8:25276773-25282556	Less frequent than 10%
Del	chr8:1-27000000	CDCA2	chr8:25316512-25365425	Less frequent than 10%
Del	chr8:1-27000000	BNIP3L	chr8:26240522-26270644	Less frequent than 10%
Del	chr8:1-27000000	ERICH1	chr8:614199-681226	Less frequent than 10%
Del	chr8:1-27000000	FBXO25	chr8:356807-419875	Less frequent than 10%
Del	chr8:1-27000000	ARHGEF10	chr8:1772148-1906807	Less frequent than 10%
Del	chr8:1-27000000	DLGAP2	chr8:1449531-1656642	Less frequent than 10%
Del	chr8:1-27000000	FAM66B	chr8:7159132-7212876	Less frequent than 10%
Del	chr8:1-27000000	XKR5	chr8:6666040-6693166	Less frequent than 10%
Del	chr8:1-27000000	DEFB105A	chr8:7345242-7681360	Less frequent than 10%
Del	chr8:1-27000000	DEFB105B	chr8:7345242-7681360	Less frequent than 10%
Del	chr8:1-27000000	DEFB107A	chr8:7353367-7673238	Less frequent than 10%
Del	chr8:1-27000000	DEFB107B	chr8:7353367-7673238	Less frequent than 10%
Del	chr8:1-27000000	FAM66E	chr8:7812534-7866277	Less frequent than 10%
Del	chr8:1-27000000	LOC100131608	chr8:7397148-7638936	Less frequent than 10%
Del	chr8:1-27000000	LOC100133251	chr8:7397149-7638935	Less frequent than 10%
Del	chr8:1-27000000	MFHAS1	chr8:8641998-8751131	Less frequent than 10%
Del	chr8:1-27000000	MSRA	chr8:9911829-10286401	Less frequent than 10%
Del	chr8:1-27000000	BLK	chr8:11351520-11422108	Less frequent than 10%
Del	chr8:1-27000000	C8orf12	chr8:11225910-11296166	Less frequent than 10%
Del	chr8:1-27000000	XKR6	chr8:10753656-11058875	Less frequent than 10%
Del	chr8:1-27000000	DEFB130	chr8:11921897-12175825	Less frequent than 10%
Del	chr8:1-27000000	FDFT1	chr8:11660189-11696818	Less frequent than 10%
Del	chr8:1-27000000	LOC100133267	chr8:11921897-12175825	Less frequent than 10%
Del	chr8:1-27000000	LOC100506990	chr8:12294521-12424354	Less frequent than 10%
Del	chr8:1-27000000	LOC729732	chr8:12394587-12523120	Less frequent than 10%
Del	chr8:1-27000000	DLC1	chr8:12940871-13372429	Less frequent than 10%
Del	chr8:1-27000000	KIAA1456	chr8:12803182-12887284	Less frequent than 10%
Del	chr8:1-27000000	TUSC3	chr8:15397595-15624158	Less frequent than 10%
Del	chr8:1-27000000	MSR1	chr8:15965386-16050300	Less frequent than 10%
Del	chr8:1-27000000	MICU3	chr8:16884746-16980148	Less frequent than 10%
Del	chr8:1-27000000	MTMR7	chr8:17154305-17271040	Less frequent than 10%
Del	chr8:1-27000000	MTUS1	chr8:17501302-17658426	Less frequent than 10%
Del	chr8:1-27000000	ZDHHC2	chr8:17013835-17080241	Less frequent than 10%
Del	chr8:1-27000000	PSD3	chr8:18384812-18871196	Less frequent than 10%
Del	chr8:1-27000000	CSGALNACT1	chr8:19261671-19540261	Less frequent than 10%
Del	chr8:1-27000000	LOC286114	chr8:20831496-20852630	Less frequent than 10%
Del	chr8:1-27000000	GFRA2	chr8:21549529-21646346	Less frequent than 10%
Del	chr8:1-27000000	NPM2	chr8:21882353-21894408	Less frequent than 10%
Del	chr8:1-27000000	LOC286059	chr8:22925741-22941132	Less frequent than 10%
Del	chr8:1-27000000	PEBP4	chr8:22570764-22785421	Less frequent than 10%
Del	chr8:1-27000000	PIWIL2	chr8:22132809-22213584	Less frequent than 10%
Del	chr8:1-27000000	SLC39A14	chr8:22224761-22291640	Less frequent than 10%
Del	chr8:1-27000000	SORBS3	chr8:22409250-22433008	Less frequent than 10%
Del	chr8:1-27000000	LOC100507156	chr8:23193720-23223638	Less frequent than 10%
Del	chr8:1-27000000	LOXL2	chr8:23154409-23261722	Less frequent than 10%
Del	chr8:1-27000000	ADAMDEC1	chr8:24241797-24263526	Less frequent than 10%
Del	chr8:1-27000000	NEFM	chr8:24771273-24776606	Less frequent than 10%
Del	chr8:1-27000000	EBF2	chr8:25699245-25902640	Less frequent than 10%
Del	chr8:1-27000000	KCTD9	chr8:25285363-25315984	Less frequent than 10%
Del	chr8:1-27000000	ADRA1A	chr8:26605666-26722922	Less frequent than 10%
Del	chr8:1-27000000	DPYSL2	chr8:26371708-26515693	Less frequent than 10%
Del	chr8:1-27000000	CSMD1	chr8:2792874-4852328	Less frequent than 10%
Del	chr8:1-27000000	DEFB103A	chr8:7286490-7740105	Less frequent than 10%
Del	chr8:1-27000000	DEFB103B	chr8:7286415-7740180	Less frequent than 10%
Del	chr8:1-27000000	DEFB104A	chr8:7327829-7698764	Less frequent than 10%
Del	chr8:1-27000000	DEFB104B	chr8:7327829-7698764	Less frequent than 10%
Del	chr8:1-27000000	DEFB106A	chr8:7340025-7686575	Less frequent than 10%
Del	chr8:1-27000000	DEFB106B	chr8:7340025-7686575	Less frequent than 10%
Del	chr8:1-27000000	DEFB109P1B	chr8:7170367-7855043	Less frequent than 10%
Del	chr8:1-27000000	ERICH1-AS1	chr8:687586-1087777	Less frequent than 10%
Del	chr8:1-27000000	MCPH1	chr8:6264112-6501140	Less frequent than 10%
Del	chr8:1-27000000	SPAG11B	chr8:7305275-7707807	Less frequent than 10%
Del	chr8:1-27000000	LONRF1	chr8:12579405-12612992	Less frequent than 10%
Del	chr8:1-27000000	RP1L1	chr8:10463859-10512617	Less frequent than 10%
Del	chr8:1-27000000	SGCZ	chr8:13947372-15095792	Less frequent than 10%
Del	chr8:1-27000000	TNKS	chr8:9413444-9639856	Less frequent than 10%
Del	chr8:1-27000000	PCM1	chr8:17780365-17887457	Less frequent than 10%
Del	chr8:1-27000000	SFTPC	chr8:22019183-22021991	Less frequent than 10%
Del	chr8:1-27000000	TNFRSF10A	chr8:23048969-23082680	Less frequent than 10%
Del	chr8:1-27000000	PPP2R2A	chr8:26149006-26230195	Less frequent than 10%
Del	chr8:1-27000000	DOCK5	chr8:25042286-25270619	Less frequent than 10%
Del	chr9:1-27000000	DDX11L5	chr9:11986-14525	Less frequent than 10%
Del	chr9:1-27000000	FAM138C	chr9:34393-35864	Less frequent than 10%
Del	chr9:1-27000000	FOXD4	chr9:116230-118417	Less frequent than 10%
Del	chr9:1-27000000	C9orf66	chr9:213107-215893	Less frequent than 10%
Del	chr9:1-27000000	DMRT2	chr9:1050345-1057554	Less frequent than 10%
Del	chr9:1-27000000	PPAPDC2	chr9:4662293-4665272	Less frequent than 10%
Del	chr9:1-27000000	MIR101-2	chr9:4850296-4850375	Less frequent than 10%
Del	chr9:1-27000000	INSL4	chr9:5231418-5233967	Less frequent than 10%
Del	chr9:1-27000000	RLN2	chr9:5299865-5304611	Less frequent than 10%
Del	chr9:1-27000000	RLN1	chr9:5334931-5339873	Less frequent than 10%
Del	chr9:1-27000000	MIR4665	chr9:6007825-6007904	Less frequent than 10%
Del	chr9:1-27000000	TPD52L3	chr9:6328348-6331900	Less frequent than 10%
Del	chr9:1-27000000	CER1	chr9:14719731-14722715	Less frequent than 10%
Del	chr9:1-27000000	MIR3152	chr9:18573303-18573377	Less frequent than 10%
Del	chr9:1-27000000	RRAGA	chr9:19049371-19051021	Less frequent than 10%
Del	chr9:1-27000000	SCARNA8	chr9:19063653-19063784	Less frequent than 10%
Del	chr9:1-27000000	RPS6	chr9:19376253-19380235	Less frequent than 10%
Del	chr9:1-27000000	MIR4473	chr9:20411145-20411236	Less frequent than 10%
Del	chr9:1-27000000	MIR4474	chr9:20502262-20502340	Less frequent than 10%
Del	chr9:1-27000000	MIR491	chr9:20716103-20716187	Less frequent than 10%
Del	chr9:1-27000000	IFNB1	chr9:21077103-21077943	Less frequent than 10%
Del	chr9:1-27000000	IFNW1	chr9:21140630-21142144	Less frequent than 10%
Del	chr9:1-27000000	MIR31	chr9:21512113-21512184	Less frequent than 10%
Del	chr9:1-27000000	C9orf53	chr9:21967137-21967753	Less frequent than 10%
Del	chr9:1-27000000	TUSC1	chr9:25676386-25678856	Less frequent than 10%
Del	chr9:1-27000000	WASH1	chr9:14510-29739	Less frequent than 10%
Del	chr9:1-27000000	DMRT3	chr9:976967-991732	Less frequent than 10%
Del	chr9:1-27000000	KCNV2	chr9:2717525-2730037	Less frequent than 10%
Del	chr9:1-27000000	VLDLR	chr9:2621792-2654485	Less frequent than 10%
Del	chr9:1-27000000	KIAA0020	chr9:2804154-2844130	Less frequent than 10%
Del	chr9:1-27000000	GLIS3-AS1	chr9:3898645-3901248	Less frequent than 10%
Del	chr9:1-27000000	SLC1A1	chr9:4490426-4587469	Less frequent than 10%
Del	chr9:1-27000000	CDC37L1	chr9:4679565-4706594	Less frequent than 10%
Del	chr9:1-27000000	SPATA6L	chr9:4598315-4666674	Less frequent than 10%
Del	chr9:1-27000000	INSL6	chr9:5163862-5185618	Less frequent than 10%
Del	chr9:1-27000000	CD274	chr9:5450502-5470567	Less frequent than 10%
Del	chr9:1-27000000	PDCD1LG2	chr9:5510544-5571282	Less frequent than 10%
Del	chr9:1-27000000	ERMP1	chr9:5784571-5833081	Less frequent than 10%
Del	chr9:1-27000000	KIAA2026	chr9:5919007-6008003	Less frequent than 10%
Del	chr9:1-27000000	RANBP6	chr9:6011018-6015640	Less frequent than 10%
Del	chr9:1-27000000	IL33	chr9:6215785-6257983	Less frequent than 10%
Del	chr9:1-27000000	TMEM261	chr9:7796490-7799799	Less frequent than 10%
Del	chr9:1-27000000	TYRP1	chr9:12693385-12710266	Less frequent than 10%
Del	chr9:1-27000000	LURAP1L	chr9:12775011-12823059	Less frequent than 10%
Del	chr9:1-27000000	FLJ41200	chr9:13406378-13431328	Less frequent than 10%
Del	chr9:1-27000000	LINC00583	chr9:13927969-13945606	Less frequent than 10%
Del	chr9:1-27000000	LOC389705	chr9:14993324-15019722	Less frequent than 10%
Del	chr9:1-27000000	SNAPC3	chr9:15422781-15461627	Less frequent than 10%
Del	chr9:1-27000000	HAUS6	chr9:19053134-19102940	Less frequent than 10%
Del	chr9:1-27000000	PLIN2	chr9:19115758-19127604	Less frequent than 10%
Del	chr9:1-27000000	ACER2	chr9:19408924-19452500	Less frequent than 10%
Del	chr9:1-27000000	PTPLAD2	chr9:21006364-21031635	Less frequent than 10%
Del	chr9:1-27000000	IZUMO3	chr9:24543212-24545674	Less frequent than 10%
Del	chr9:1-27000000	PLAA	chr9:26903367-26947468	Less frequent than 10%
Del	chr9:1-27000000	CBWD1	chr9:121037-179075	Less frequent than 10%
Del	chr9:1-27000000	DMRT1	chr9:841689-969090	Less frequent than 10%
Del	chr9:1-27000000	DOCK8	chr9:214864-465259	Less frequent than 10%
Del	chr9:1-27000000	KANK1	chr9:470293-746106	Less frequent than 10%
Del	chr9:1-27000000	FLJ35024	chr9:2535654-2622373	Less frequent than 10%
Del	chr9:1-27000000	RFX3	chr9:3218296-3526001	Less frequent than 10%
Del	chr9:1-27000000	AK3	chr9:4709556-4742043	Less frequent than 10%
Del	chr9:1-27000000	JAK2	chr9:4985244-5128183	Less frequent than 10%
Del	chr9:1-27000000	RCL1	chr9:4792833-4861064	Less frequent than 10%
[truncated: 65 more rows]

## Sheet: Table S6
Supplementary Table S6. Top N most significant genes showing prognostic impact on overall survival
Cross-validation Set	Gene Index	Chr	Start	End	Gene	CNA Type	Optimal Cutoff
Cross-validation_1	1	chr12	23685230	24715383	SOX5	Amp	High: > 6 Low: <=6
Cross-validation_1	2	chr12	25261222	25348094	CASC1	Amp
Cross-validation_1	3	chr12	24962957	25102393	BCAT1	Amp
Cross-validation_1	4	chr12	26488284	26986131	ITPR2	Amp
Cross-validation_1	5	chr12	24719897	24737102	LINC00477	Amp
Cross-validation_1	6	chr3	176738541	176915048	TBL1XR1	Amp
Cross-validation_1	7	chr12	25205180	25261269	LRMP	Amp
Cross-validation_1	8	chr12	26111963	26232825	RASSF8	Amp
Cross-validation_1	9	chr8	6264112	6501140	MCPH1	Del
Cross-validation_1	10	chr9	470293	746106	KANK1	Del
Cross-validation_1	11	chr8	133787603	133861052	PHF20L1	Amp
Cross-validation_1	12	chr8	130851838	131028897	FAM49B	Amp
Cross-validation_1	13	chr7	7680341	7918851	RPA3.AS1	Amp
Cross-validation_1	14	chr8	125323158	125384940	TMEM65	Amp
Cross-validation_1	15	chr8	687586	1087777	ERICH1.AS1	Del
Cross-validation_1	16	chr7	16250110	16310229	ISPD.AS1	Amp
Cross-validation_1	17	chr8	125500734	125551329	TATDN1	Amp
Cross-validation_1	18	chr3	177159708	177470492	LINC00578	Amp
Cross-validation_1	19	chr7	8473584	8792593	NXPH1	Amp
Cross-validation_1	20	chr8	133584200	133687863	LRRC6	Amp
Cross-validation_1	21	chr7	19758937	19812404	TMEM196	Amp
Cross-validation_1	22	chr14	51186480	51297839	NIN	Amp
Cross-validation_1	23	chr3	174577110	175523428	NAALADL2	Amp
Cross-validation_1	24	chr18	57098170	57364644	CCBE1	Del
Cross-validation_1	25	chr3	58223258	58280461	ABHD6	Del
Cross-validation_1	26	chr3	178254085	178562217	KCNMB2	Amp
Cross-validation_1	27	chr8	136469715	136659848	KHDRBS3	Amp
Cross-validation_1	28	chr3	193119865	193272696	ATP13A4	Amp
Cross-validation_1	29	chr9	841689	969090	DMRT1	Del
Cross-validation_1	30	chr12	25629015	25801496	IFLTD1	Amp
Cross-validation_1	31	chr7	11410061	11871824	THSD7A	Amp
Cross-validation_1	32	chr12	25358179	25403854	KRAS	Amp
Cross-validation_1	33	chr8	26371708	26515693	DPYSL2	Del
Cross-validation_1	34	chr8	19261671	19540261	CSGALNACT1	Del
Cross-validation_1	35	chr3	46477495	46506598	LTF	Del
Cross-validation_1	36	chr3	45123765	45187914	CDCP1	Del
Cross-validation_2	1	chr9	470293	746106	KANK1	Del	High: > 7 Low: <=7
Cross-validation_2	2	chr12	25261222	25348094	CASC1	Amp
Cross-validation_2	3	chr8	6264112	6501140	MCPH1	Del
Cross-validation_2	4	chr12	24719897	24737102	LINC00477	Amp
Cross-validation_2	5	chr8	130851838	131028897	FAM49B	Amp
Cross-validation_2	6	chr18	60790578	60986613	BCL2	Del
Cross-validation_2	7	chr8	130760441	130799134	GSDMC	Amp
Cross-validation_2	8	chr9	3824127	4300035	GLIS3	Del
Cross-validation_2	9	chr9	841689	969090	DMRT1	Del
Cross-validation_2	10	chr8	125500734	125551329	TATDN1	Amp
Cross-validation_2	11	chr12	25205180	25261269	LRMP	Amp
Cross-validation_2	12	chr12	23685230	24715383	SOX5	Amp
Cross-validation_2	13	chr9	2015341	2193623	SMARCA2	Del
Cross-validation_2	14	chr3	52937582	53080089	SFMBT1	Del
Cross-validation_2	15	chr12	24962957	25102393	BCAT1	Amp
Cross-validation_2	16	chr8	1772148	1906807	ARHGEF10	Del
Cross-validation_2	17	chr19	38123388	38146313	ZFP30	Amp
Cross-validation_2	18	chr3	58223258	58280461	ABHD6	Del
Cross-validation_2	19	chr8	19041185	19103032	LOC100128993	Del
Cross-validation_2	20	chr3	47892179	48130769	MAP4	Del
Cross-validation_2	21	chr3	177159708	177470492	LINC00578	Amp
Cross-validation_2	22	chr8	133787603	133861052	PHF20L1	Amp
Cross-validation_2	23	chr8	133722191	133772914	TMEM71	Amp
Cross-validation_2	24	chr7	7680341	7918851	RPA3.AS1	Amp
Cross-validation_2	25	chr8	125323158	125384940	TMEM65	Amp
Cross-validation_2	26	chr3	186172769	186211450	LOC253573	Amp
Cross-validation_2	27	chr8	22570764	22785421	PEBP4	Del
Cross-validation_2	28	chr8	124864226	125132302	FER1L6	Amp
Cross-validation_2	29	chr8	18384812	18871196	PSD3	Del
Cross-validation_2	30	chr8	126036502	126104061	KIAA0196	Amp
Cross-validation_2	31	chr12	25358179	25403854	KRAS	Amp
Cross-validation_2	32	chr8	687586	1087777	ERICH1.AS1	Del
Cross-validation_2	33	chr3	38495789	38534633	ACVR2B	Del
Cross-validation_2	34	chr3	193310932	193415600	OPA1	Amp
Cross-validation_2	35	chr18	60382671	60647676	PHLPP1	Del
Cross-validation_3	1	chr12	24719897	24737102	LINC00477	Amp	High: > 2 Low: <=2
Cross-validation_3	2	chr12	25261222	25348094	CASC1	Amp
Cross-validation_3	3	chr9	3824127	4300035	GLIS3	Del
Cross-validation_3	4	chr9	470293	746106	KANK1	Del
Cross-validation_3	5	chr18	61144143	61172318	SERPINB5	Del
Cross-validation_3	6	chr8	6264112	6501140	MCPH1	Del
Cross-validation_3	7	chr12	24962957	25102393	BCAT1	Amp
Cross-validation_3	8	chr8	130851838	131028897	FAM49B	Amp
Cross-validation_3	9	chr12	23685230	24715383	SOX5	Amp
Cross-validation_3	10	chr3	58223258	58280461	ABHD6	Del
Cross-validation_3	11	chr8	126036502	126104061	KIAA0196	Amp
Cross-validation_3	12	chr8	125500734	125551329	TATDN1	Amp
Cross-validation_3	13	chr7	7680341	7918851	RPA3.AS1	Amp
Cross-validation_3	14	chr12	25205180	25261269	LRMP	Amp
Cross-validation_4	1	chr12	25261222	25348094	CASC1	Amp	High: > 7 Low: <=7
Cross-validation_4	2	chr12	24719897	24737102	LINC00477	Amp
Cross-validation_4	3	chr12	24962957	25102393	BCAT1	Amp
Cross-validation_4	4	chr3	52870771	52931597	TMEM110	Del
Cross-validation_4	5	chr9	3824127	4300035	GLIS3	Del
Cross-validation_4	6	chr12	26111963	26232825	RASSF8	Amp
Cross-validation_4	7	chr12	23685230	24715383	SOX5	Amp
Cross-validation_4	8	chr8	6264112	6501140	MCPH1	Del
Cross-validation_4	9	chr9	470293	746106	KANK1	Del
Cross-validation_4	10	chr3	52867130	52931597	TMEM110.MUSTN1	Del
Cross-validation_4	11	chr18	60790578	60986613	BCL2	Del
Cross-validation_4	12	chr3	38495789	38534633	ACVR2B	Del
Cross-validation_4	13	chr8	1772148	1906807	ARHGEF10	Del
Cross-validation_4	14	chr9	16203932	16276311	C9orf92	Del
Cross-validation_4	15	chr8	1449531	1656642	DLGAP2	Del
Cross-validation_4	16	chr3	197687070	197770591	LMLN	Amp
Cross-validation_4	17	chr7	7680341	7918851	RPA3.AS1	Amp
Cross-validation_4	18	chr7	8473584	8792593	NXPH1	Amp
Cross-validation_4	19	chr8	22022652	22069840	BMP1	Del
Cross-validation_4	20	chr12	25205180	25261269	LRMP	Amp
Cross-validation_4	21	chr12	26488284	26986131	ITPR2	Amp
Cross-validation_4	22	chr3	58223258	58280461	ABHD6	Del
Cross-validation_4	23	chr8	11225910	11296166	C8orf12	Del
Cross-validation_4	24	chr1	161736033	161933860	ATF6	Amp
Cross-validation_4	25	chr9	6532463	6645692	GLDC	Del
Cross-validation_4	26	chr18	57098170	57364644	CCBE1	Del
Cross-validation_4	27	chr8	130760441	130799134	GSDMC	Amp
Cross-validation_4	28	chr8	130851838	131028897	FAM49B	Amp
Cross-validation_4	29	chr12	25358179	25403854	KRAS	Amp
Cross-validation_4	30	chr19	37902059	37958339	ZNF569	Amp
Cross-validation_4	31	chr3	47892179	48130769	MAP4	Del
Cross-validation_4	32	chr18	61144143	61172318	SERPINB5	Del
Cross-validation_4	33	chr8	25042286	25270619	DOCK5	Del
Cross-validation_4	34	chr8	11561716	11617509	GATA4	Del
Cross-validation_4	35	chr8	22570764	22785421	PEBP4	Del
Cross-validation_4	36	chr19	52359055	52391229	ZNF577	Amp
Cross-validation_4	37	chr8	139142265	139509065	FAM135B	Amp
Cross-validation_4	38	chr8	18384812	18871196	PSD3	Del
Cross-validation_4	39	chr9	841689	969090	DMRT1	Del
Cross-validation_4	40	chr8	131792546	132052835	ADCY8	Amp
Cross-validation_4	41	chr8	133787603	133861052	PHF20L1	Amp
Cross-validation_4	42	chr8	125500734	125551329	TATDN1	Amp
Cross-validation_4	43	chr3	177159708	177470492	LINC00578	Amp
Cross-validation_5	1	chr12	25261222	25348094	CASC1	Amp	High: > 4 Low: <=4
Cross-validation_5	2	chr12	24719897	24737102	LINC00477	Amp
Cross-validation_5	3	chr8	130851838	131028897	FAM49B	Amp
Cross-validation_5	4	chr3	52937582	53080089	SFMBT1	Del
Cross-validation_5	5	chr8	6264112	6501140	MCPH1	Del
Cross-validation_5	6	chr3	57994126	58157982	FLNB	Del
Cross-validation_5	7	chr3	58223258	58280461	ABHD6	Del
Cross-validation_5	8	chr3	47892179	48130769	MAP4	Del
Cross-validation_5	9	chr18	60790578	60986613	BCL2	Del
Cross-validation_5	10	chr8	18384812	18871196	PSD3	Del
Cross-validation_5	11	chr3	45524186	45551037	LARS2.AS1	Del
Cross-validation_5	12	chr14	51186480	51297839	NIN	Amp
Cross-validation_5	13	chr3	50242691	50258406	SLC38A3	Del
Cross-validation_5	14	chr9	470293	746106	KANK1	Del
Cross-validation_5	15	chr3	177159708	177470492	LINC00578	Amp
Cross-validation_5	16	chr8	125500734	125551329	TATDN1	Amp
Cross-validation_5	17	chr12	23685230	24715383	SOX5	Amp
Cross-validation_5	18	chr3	178254085	178562217	KCNMB2	Amp
Cross-validation_5	19	chr14	39218542	39386086	LINC00639	Amp
Cross-validation_5	20	chr8	8641998	8751131	MFHAS1	Del
Cross-validation_5	21	chr8	126010719	126034525	SQLE	Amp
Cross-validation_5	22	chr12	26111963	26232825	RASSF8	Amp
Cross-validation_5	23	chr8	130760441	130799134	GSDMC	Amp
Cross-validation_5	24	chr8	22022652	22069840	BMP1	Del
Cross-validation_5	25	chr7	8473584	8792593	NXPH1	Amp
Cross-validation_5	26	chr1	161736033	161933860	ATF6	Amp
Cross-validation_5	27	chr8	8175257	8239257	SGK223	Del
Cross-validation_5	28	chr19	52359055	52391229	ZNF577	Amp
Cross-validation_5	29	chr8	125323158	125384940	TMEM65	Amp
Cross-validation_5	30	chr12	26488284	26986131	ITPR2	Amp
Cross-validation_5	31	chr8	11561716	11617509	GATA4	Del
Cross-validation_5	32	chr19	56915382	56936400	ZNF583	Amp
Cross-validation_5	33	chr9	21967750	21994490	CDKN2A	Del
amplification, Amp; deletion, Del; copy number alteration, CNA;

## Sheet: Table S7
Supplementary Table S7. Overlap profile of the top N most significant genes in each cross-validation set
Cross-validation Overlap	# of Genes	Genes	CNA Type
Cross-validation_1, Cross-validation_2, Cross-validation_3, Cross-validation_4, Cross-validation_5	8	KANK1	Del
		ABHD6	Del
		CASC1	Amp
		TATDN1	Amp
		SOX5	Amp
		FAM49B	Amp
		LINC00477	Amp
		MCPH1	Del
Cross-validation_1, Cross-validation_2, Cross-validation_3, Cross-validation_4	3	LRMP	Amp
		BCAT1	Amp
		RPA3.AS1	Amp
Cross-validation_1, Cross-validation_2, Cross-validation_4, Cross-validation_5	1	LINC00578	Amp
Cross-validation_1, Cross-validation_2, Cross-validation_4	3	KRAS	Amp
		DMRT1	Del
		PHF20L1	Amp
Cross-validation_1, Cross-validation_2, Cross-validation_5	1	TMEM65	Amp
Cross-validation_1, Cross-validation_4, Cross-validation_5	3	RASSF8	Amp
		ITPR2	Amp
		NXPH1	Amp
Cross-validation_2, Cross-validation_3, Cross-validation_4	1	GLIS3	Del
Cross-validation_2, Cross-validation_4, Cross-validation_5	4	MAP4	Del
		BCL2	Del
		GSDMC	Amp
		PSD3	Del
Cross-validation_1, Cross-validation_2	1	ERICH1.AS1	Del
Cross-validation_1, Cross-validation_4	1	CCBE1	Del
Cross-validation_1, Cross-validation_5	2	KCNMB2	Amp
		NIN	Amp
Cross-validation_2, Cross-validation_3	1	KIAA0196	Amp
Cross-validation_2, Cross-validation_4	3	ARHGEF10	Del
		ACVR2B	Del
		PEBP4	Del
Cross-validation_2, Cross-validation_5	1	SFMBT1	Del
Cross-validation_3, Cross-validation_4	1	SERPINB5	Del
Cross-validation_4, Cross-validation_5	4	ATF6	Amp
		ZNF577	Amp
		GATA4	Del
		BMP1	Del
Cross-validation_1	13	LTF	Del
		IFLTD1	Amp
		LRRC6	Amp
		ATP13A4	Amp
		CDCP1	Del
		TBL1XR1	Amp
		ISPD.AS1	Amp
		NAALADL2	Amp
		THSD7A	Amp
		KHDRBS3	Amp
		DPYSL2	Del
		CSGALNACT1	Del
		TMEM196	Amp
Cross-validation_2	8	LOC253573	Amp
		LOC100128993	Del
		ZFP30	Amp
		TMEM71	Amp
		SMARCA2	Del
		FER1L6	Amp
		PHLPP1	Del
		OPA1	Amp
Cross-validation_4	11	TMEM110.MUSTN1	Del
		GLDC	Del
		DOCK5	Del
		TMEM110	Del
		ZNF569	Amp
		ADCY8	Amp
		DLGAP2	Del
		C8orf12	Del
		FAM135B	Amp
		C9orf92	Del
		LMLN	Amp
Cross-validation_5	9	SLC38A3	Del
		LARS2.AS1	Del
		SQLE	Amp
		CDKN2A	Del
		MFHAS1	Del
		LINC00639	Amp
		ZNF583	Amp
		FLNB	Del
		SGK223	Del
amplification, Amp; deletion, Del; copy number alteration, CNA;
